# Supplementary material for: Facile synthesis of 1-trifluoromethylalkenes via the decarboxylation of α-trifluoromethyl-β-lactones
Source: Royal Society of Chemistry journal article supplement (doi:10.1039/c5cc03230j), 2015-01-01
Supplement: c5cc03230j1.pdf [file c5cc03230j1.pdf]

# Facile Synthesis of Trifluoromethyl Olefins via the Decarboxylation of $\alpha$ -Trifluoromethyl- $\beta$ -lactones

P. Veeraraghavan Ramachandran\* and Barnabas Otoo

Department of Chemistry, Purdue University

560 Oval Drive, West Lafayette, IN 47907-2084

Fax: (+) 1-765-494-0239

Email: [chandran@purdue.edu](mailto:chandran@purdue.edu)

## Supporting Information

### Contents

|                                    |   |
|------------------------------------|---|
| General information.....           | 1 |
| Characterization of compounds..... | 2 |
| NMR Spectra.....                   | 9 |

### General information:

All reactions were conducted under an inert atmosphere. Dichloromethane and pentane were freshly distilled from calcium hydride. Diethyl ether and tetrahydrofuran (THF) were distilled from sodium/benzophenone. All other chemicals were purchased from Aldrich Chemical Co. and used without further purification, unless otherwise noted. Reaction-flasks were dried in oven at 100 °C for 12 h prior to use.  $^1\text{H}$ ,  $^{13}\text{C}$ , and  $^{19}\text{F}$  NMR spectra were recorded on Varian ASM 300 MHz spectrometer. Chemical shift ( $\delta$ ) values are reported in parts per million, and are referenced to either tetramethylsilane or dimethyl sulfoxide. Data are reported as:  $\delta$  value (multiplicity,  $J$ -value, integration, where s=singlet, d=doublet, t=triplet, m=multiplet, br=broad). 3,3,3-trifluoropropanoic acid was purchased from Oakwood Products, Inc.; All haloboranes<sup>1</sup> were

---

1 . (a) H. C. Brown; P. V. Ramachandran; J. Chandrasekharan. *J. Org. Chem.* 1985, **50**, 5446. (b) H. C. Brown; R.

prepared according to literature procedures. Diastereomeric ratios (*syn:anti* ratios) of  $\beta$ -hydroxy- $\alpha$ -trifluoromethylpropanoic acid were determined by  $^{19}\text{F}$  NMR analysis.

### Characterization of compounds

#### *Anti* - 4-phenyl-3-(trifluoromethyl)oxetan-2-one (2a)

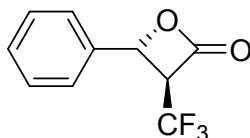

$^1\text{H}$  NMR (300 MHz,  $\text{CDCl}_3$ ):  $\delta$  7.48-7.39 (m, 5H), 5.65 (d,  $J = 4.5$  Hz, 1H), 4.26 (qd,  $J = 4.2$ , 8.7 Hz, 1H);  $^{13}\text{C}$  NMR (75 MHz,  $\text{CDCl}_3$ ):  $\delta$  160.3 (q,  $J = 5.4$ Hz), 134.3, 130.0, 129.3, 125.4, 122.0 (q,  $J = 277.1$ Hz), 71.8, 62.1 (q,  $J = 31.6$  Hz);  $^{19}\text{F}$  NMR (282 MHz,  $\text{CDCl}_3$ ):  $\delta$  -69.2 (d,  $J_{\text{H-F}} = 8.5$  Hz, 3F). LRMS (-ve APCI) calcd(M-H) 215, found 215.

#### *Anti*-4-(4-fluorophenyl)-3-(trifluoromethyl)oxetan-2-one (2c)

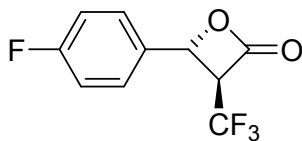

$^1\text{H}$  NMR (300 MHz,  $\text{CDCl}_3$ ):  $\delta$  7.40 (dd,  $J = 5.1$ , 8.7, 2H), 7.17 (t,  $J = 8.6$  Hz, 2H), 5.63 (d,  $J = 4.5$  Hz, 1H), 4.25 (qd,  $J = 4.2$ , 8.7 Hz, 1H);  $^{13}\text{C}$  NMR (75 MHz,  $\text{CDCl}_3$ ):  $\delta$  165.0, 161.7, 159.7, 130.0, 127.3, 126.5, 121.7 (q,  $J_{\text{C-F}} = 274.9$  Hz), 116.5, 116.2, 105.4, 71.2, 62.4 (q,  $J_{\text{C-F}} = 31.8$  Hz);  $^{19}\text{F}$  NMR (282 MHz,  $\text{CDCl}_3$ ):  $\delta$  -69.3 (d,  $J_{\text{H-F}} = 8.5$  Hz, 3F), -111.5 (s, 1H). LRMS (-ve APCI) calcd(M-H) 233, found 233.

#### *Anti*-4-cyclohexyl-3-(trifluoromethyl)oxetan-2-one (2h)

---

K. Dhar; K. Ganesan; B. Singaram, *J. Org. Chem.* 1992, **57**, 499. (c) H. C. Brown; K. Ganesan; R. K. Dhar, *J. Org. Chem.* 1993, **58**, 147.

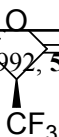

**<sup>1</sup>H NMR (300 MHz, CDCl<sub>3</sub>):** δ 4.34 (dd, *J* = 4.5, 8.4Hz, 1H), 4.02 (qd, *J* = 4.2, 8.7 Hz, 1H), 1.86-1.67 (m, 7H), 1.34-1.22 (m, 4H); **<sup>13</sup>C NMR (75 MHz, CDCl<sub>3</sub>):** δ 160.4, 121.9 (q, *J* = 274.3 Hz), 75.7, 57.4 (q, 31.6Hz), 40.9, 27.9, 26.6, 25.7, 25.1; **<sup>19</sup>F NMR (282 MHz, CDCl<sub>3</sub>):** δ -67.75 (d, *J*<sub>H-F</sub> = 7.1Hz, *syn*-3H), -69.04 (d, *J*<sub>H-F</sub> = 8.5Hz, 3F) **HRMS LCMS** calcd (M+H) 223.0950, found 223.0943

***Anti*-4-isopropyl-3-(trifluoromethyl)oxetan-2-one (2i)**

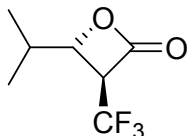

**<sup>1</sup>H NMR (300 MHz, CDCl<sub>3</sub>):** δ 4.34 (dd, *J* = 4.5, 8.4, 1H), 4.00 (qd, *J* = 4.2, 8.7Hz, 1H), 2.109-1.969 (m, 1H), 1.10 (d, *J* = 6.6, 3H), 1.02 (d, *J* = 6.6 Hz, 3H) ; **<sup>13</sup>C NMR (75 MHz, CDCl<sub>3</sub>):** δ 160.1, 121.9 (q, *J* = 274.5), 73.4, 57.2 (q, *J* = 31.1), 31.7, 17.5, 16.3; **<sup>19</sup>F NMR (282 MHz, CDCl<sub>3</sub>):** δ -67.1 (d, *J*<sub>H-F</sub> = 9.0 Hz, *syn*-3F), -69.3 (d, *J*<sub>H-F</sub> = 8.7Hz, 3H) **HRMS LCMS** calcd (M+H)183.0627, found 183.0622

***Anti*-4-(tert-butyl)-3-(trifluoromethyl)oxetan-2-one (2j)**

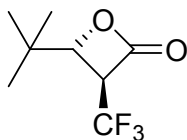

**<sup>1</sup>H NMR (300 MHz, CDCl<sub>3</sub>):** δ 4.37 (d, *J* = 4.5 Hz, 1H), 4.03 (qd, *J* = 4.2, 8.7Hz, 1H), 1.05 (s, 9H) ; **<sup>13</sup>C NMR (75 MHz, CDCl<sub>3</sub>):** δ 160.4, 122.3 (q, *J* = 274.6 Hz), 79.1, 54.9 (q, 31.4 Hz), 32.8, 24.1; **<sup>19</sup>F NMR (282 MHz, CDCl<sub>3</sub>):** δ -69.03 (d, *J*<sub>H-F</sub> = 8.7Hz, 3F) **HRMS LCMS** calcd (M+H)197.0784, found 197.0790

**(E)-(3,3,3-trifluoroprop-1-en-1-yl)benzene (3a)**

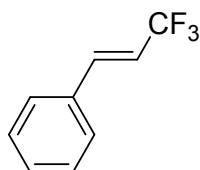

**<sup>1</sup>H NMR (300 MHz, CDCl<sub>3</sub>):** δ 7.44-7.36 (m, 5H), 7.14 (dd, *J* = 2.1, 16.2 Hz, 1H), 6.16 (dq, *J* = 6.6, 15.1, 1H); **<sup>13</sup>C NMR (75 MHz, CDCl<sub>3</sub>):** δ 137.5, 133.2, 129.8, 128.7, 127.3, 123.4 (q, *J* = 266.7Hz), 115.6 (q, *J* = 33.5Hz); **<sup>19</sup>F NMR (282 MHz, CDCl<sub>3</sub>):** δ -64.9 (d, *J*<sub>H-F</sub> = 5.9 Hz, 3F). **LRMS (ESI+)** calcd for [M+Na]<sup>+</sup> 195.0, found 195.2

**(E)-1-methyl-4-(3,3,3-trifluoroprop-1-en-1-yl)benzene (3b)**

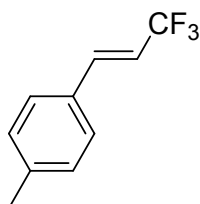

**<sup>1</sup>H NMR (300 MHz, CDCl<sub>3</sub>):** δ 7.36 (d, *J* = 8.1Hz, 2H), 7.19 (d, *J* = 7.8 Hz, 2H) 7.11 (dd, *J* = 1.8, 16.2 Hz, 1H), 6.16 (dq, *J* = 6.6, 13.2 Hz, 1H), 2.37 (s, 3H); **<sup>13</sup>C NMR (75 MHz, CDCl<sub>3</sub>):** δ 140.0, 137.3, 130.4, 129.4, 127.2, 123.6 (q, *J* = 266.7Hz), 114.6 (q, *J* = 33.3Hz), 21.3; **<sup>19</sup>F NMR (282 MHz, CDCl<sub>3</sub>):** δ -64.7 (d, *J*<sub>H-F</sub> = 5.9 Hz, 3F). **LRMS (ESI+)** calcd for [M+Na]<sup>+</sup> 209.2, found 209.2

**(E)-1-fluoro-4-(3,3,3-trifluoroprop-1-en-1-yl)benzene (3c)**

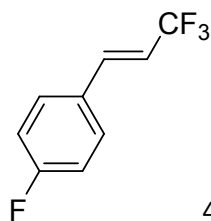

**<sup>1</sup>H NMR (300 MHz, CDCl<sub>3</sub>):** δ 7.45-7.40 (m, 2H), 7.13-7.04 (m, 3H), 6.12 (dq, *J* = 6.6, 16.1 Hz, 1H); **<sup>13</sup>C NMR (75 MHz, CDCl<sub>3</sub>):** δ 165.2, 161.9, 136.3, 129.9, 129.4 (d, *J* = 7.9 Hz), 127.4, 123.4 (q, *J* = 266.2 Hz), 116.1-115.8 (m), 115.3; **<sup>19</sup>F NMR (282 MHz, CDCl<sub>3</sub>):** δ -64.9 (d, *J*<sub>H-F</sub> = 5.6 Hz, 3F), -111.5 (s, 1H). **LRMS (ESI+)** calcd for [M+Na]<sup>+</sup> 213.1, found 213.3

**(*E*)-1-methoxy-4-(3,3,3-trifluoroprop-1-en-1-yl)benzene (3d)**

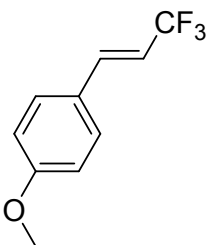

**<sup>1</sup>H NMR (300 MHz, CDCl<sub>3</sub>):** δ 7.32 (d, *J* = 8.7 Hz, 2H), 7.04 (dq, *J* = 16.1, 2.2 Hz, 1H), 6.85 (d, *J* = 8.8 Hz, 1H), 6.01 (dq, *J* = 16.1, 6.6 Hz, 1H), 3.76 (s, 3H); **<sup>13</sup>C NMR (75 MHz, CDCl<sub>3</sub>):** δ 161.1, 137.2, 132.3, 129.0, 126.0, 124.1 (q, *J* = 266.3 Hz), 114.3, 113.2 (q, *J* = 33.4 Hz), 55.3; **<sup>19</sup>F NMR (282 MHz, CDCl<sub>3</sub>):** δ -64.4 (d, *J*<sub>H-F</sub> = 5.9 Hz, 3F) **LRMS (ESI+)** calcd for [M+Na]<sup>+</sup> 225.2, found 225.3

**(*E*)-1-nitro-4-(3,3,3-trifluoroprop-1-en-1-yl)benzene (3e)**

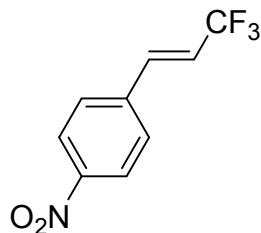

**<sup>1</sup>H NMR (300 MHz, CDCl<sub>3</sub>):** δ 8.22 (d, *J* = 2.1 Hz, 1H), 7.64 (d, *J* = 8.5 Hz, 2H), 7.23 (dq, *J* = 16.1, 2.2 Hz, 1H), 6.40 (dq, *J* = 15.9, 6.3 Hz, 1H); **<sup>13</sup>C NMR (75 MHz, CDCl<sub>3</sub>):** δ 165.9, 148.4, 141.5, 139.4, 135.5 (q, *J* = 6.8 Hz), 128.3, 124.1, 121.2, 119.8 (q, *J* = 34.3 Hz). **<sup>19</sup>F NMR (282 MHz, CDCl<sub>3</sub>)** δ -59.32 (d, *J* = 8.5 Hz Z-3F), -65.54 (d, *J* = 5.4 Hz). **LRMS (ESI+)** calcd for [M+Na]<sup>+</sup> 240.2, found 240.3

**(*E*)-2-(3,3,3-trifluoroprop-1-en-1-yl)thiophene (3f)**

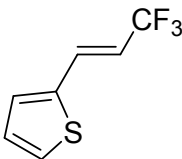

**<sup>1</sup>H NMR (300 MHz, CDCl<sub>3</sub>):** δ 7.34 (d, *J* = 5.1 Hz, 1H), 7.26 (dq, *J* = 2.1, 15.9 Hz, 1H) 7.19 (d, *J* = 3.6 Hz, 1H), 7.03(dd, *J* = 3.8, 5.0Hz, 1H), 6.01 (dq, *J* = 6.6, 15.9 Hz, 1H); **<sup>13</sup>C NMR (75 MHz, CDCl<sub>3</sub>):** δ 137.8, 130.3, 129.7, 127.7, 127.5, 123.2 (q, *J* = 302.3Hz), 114.3(q, *J* = 33.2Hz), 55.3; **<sup>19</sup>F NMR (282 MHz, CDCl<sub>3</sub>):** δ -64.6 (d, *J*<sub>H-F</sub> = 6.3 Hz, 3F). **LRMS (ESI+)** calcd for [M+Na]<sup>+</sup> 201.4, found 201.1

**((1*E*,3*E*)-5,5,5-trifluoropenta-1,3-dien-1-yl)benzene (3g)**

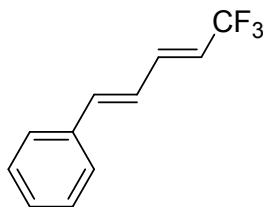

**<sup>1</sup>H NMR (300 MHz, CDCl<sub>3</sub>):** δ 7.44-7.29 (m, 5H), 6.94-6.70 (m, 3H), 5.78 (dq, *J* = 7.2, 14.1 Hz, 1H); **<sup>13</sup>C NMR (75 MHz, CDCl<sub>3</sub>):** δ 139.1, 137.3, 135.6, 128.7, 127.7, 124.7, 123.3 (q, *J* = 266.3 Hz), 118.1 (q, *J* = 32.9 Hz), 55.3; **<sup>19</sup>F NMR (282 MHz, CDCl<sub>3</sub>):** δ -64.7 (d, *J*<sub>H-F</sub> = 6.8 Hz, 3F). **LRMS (ESI+)** calcd for [M+Na]<sup>+</sup> 221.2, found 221.2

**(*E*)-(3,3,3-trifluoroprop-1-en-1-yl)cyclohexane (3h)**

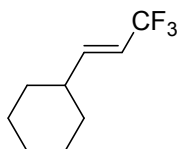

**<sup>1</sup>H NMR (300 MHz, CDCl<sub>3</sub>):** δ 6.31 (ddq, *J* = 15.9, 6.5, 2.1 Hz, 1H), 5.53 (dq, *J* = 16.1, 6.4, .5 Hz, 1H), 2.18 – 1.95 (m, 1H), 1.86 – 1.59 (m, 5H), 1.36 – 1.05 (m, 5H); **<sup>13</sup>C NMR (75 MHz, CDCl<sub>3</sub>)** δ 145.49 (q, *J* = 6.5 Hz), 123.37 (d, *J* = 268.5 Hz), 116.03 (q, *J* = 33.1 Hz), 39.71, 31.71, 25.93, 25.72, 22.4 (*Z*), 14.0 (*Z*); **<sup>19</sup>F NMR (282 MHz, CDCl<sub>3</sub>)** δ -59.63 (d, *J* = 8.4 Hz, *Z*-3F), -65.58 (d, *J* = 5.9 Hz, 3F). **LRMS (ESI+)** calcd for [M+Na]<sup>+</sup> 201.3, found 201.3

**(*E*)-1,1,1-trifluoro-4-methylpent-2-ene (3i)**

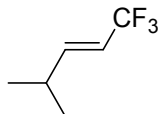

**<sup>1</sup>H NMR (300 MHz, CDCl<sub>3</sub>):** δ 6.35 (ddq, *J* = 15.8, 6.5, 2.1 Hz, 1H), 5.545 (dq, *J* = 15.9, 6.3, 1.2 Hz, 1H), 2.48-2.33 (m, 1H), 1.13 (d, *J* = 7.5 Hz, *syn*-6H), 1.06 (d, *J* = 6.6 Hz, 6H); **<sup>13</sup>C NMR (75 MHz, CDCl<sub>3</sub>):** δ 146.7, 123.3 (q, *J*<sub>C-F</sub> = 266.9 Hz), 115.7 (q, *J*<sub>C-F</sub> = 33 Hz), 30.3, 21.2; **<sup>19</sup>F NMR (282 MHz, CDCl<sub>3</sub>):** δ -56.6 (d, *J*<sub>H-F</sub> = 8.5 Hz, *Z*-3F), -65.4 (d, *J*<sub>H-F</sub> = 5.6 Hz, 3F). **LRMS (ESI+)** calcd for [M+Na]<sup>+</sup> 161.0, found 161.1

**(*E*)-1,1,1-trifluoro-4,4-dimethylpent-2-ene (3j)**

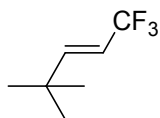

**<sup>1</sup>H NMR (300 MHz, CDCl<sub>3</sub>):** δ 6.37 (dq, *J* = 17.0, 2.1 Hz, 1H), 5.5 (dq, *J* = 16.1, 6.2 Hz, 1H), 1.07 (s, 9H); **<sup>13</sup>C NMR (75 MHz, CDCl<sub>3</sub>):** δ 150.4 (q, *J*<sub>C-F</sub> = 5.9 Hz), 123.7 (q, *J*<sub>C-F</sub> = 266.9 Hz),

114.07 (q,  $J_{C-F} = 33$  Hz), 33.1, 28.6;  **$^{19}\text{F}$  NMR (282 MHz,  $\text{CDCl}_3$ ):**  $\delta$  -65.3 (d,  $J_{H-F} = 5.6$  Hz, 3F)  
. **LRMS** (ESI+) calcd for  $[\text{M}+\text{Na}]^+$  175.2, found 175.4



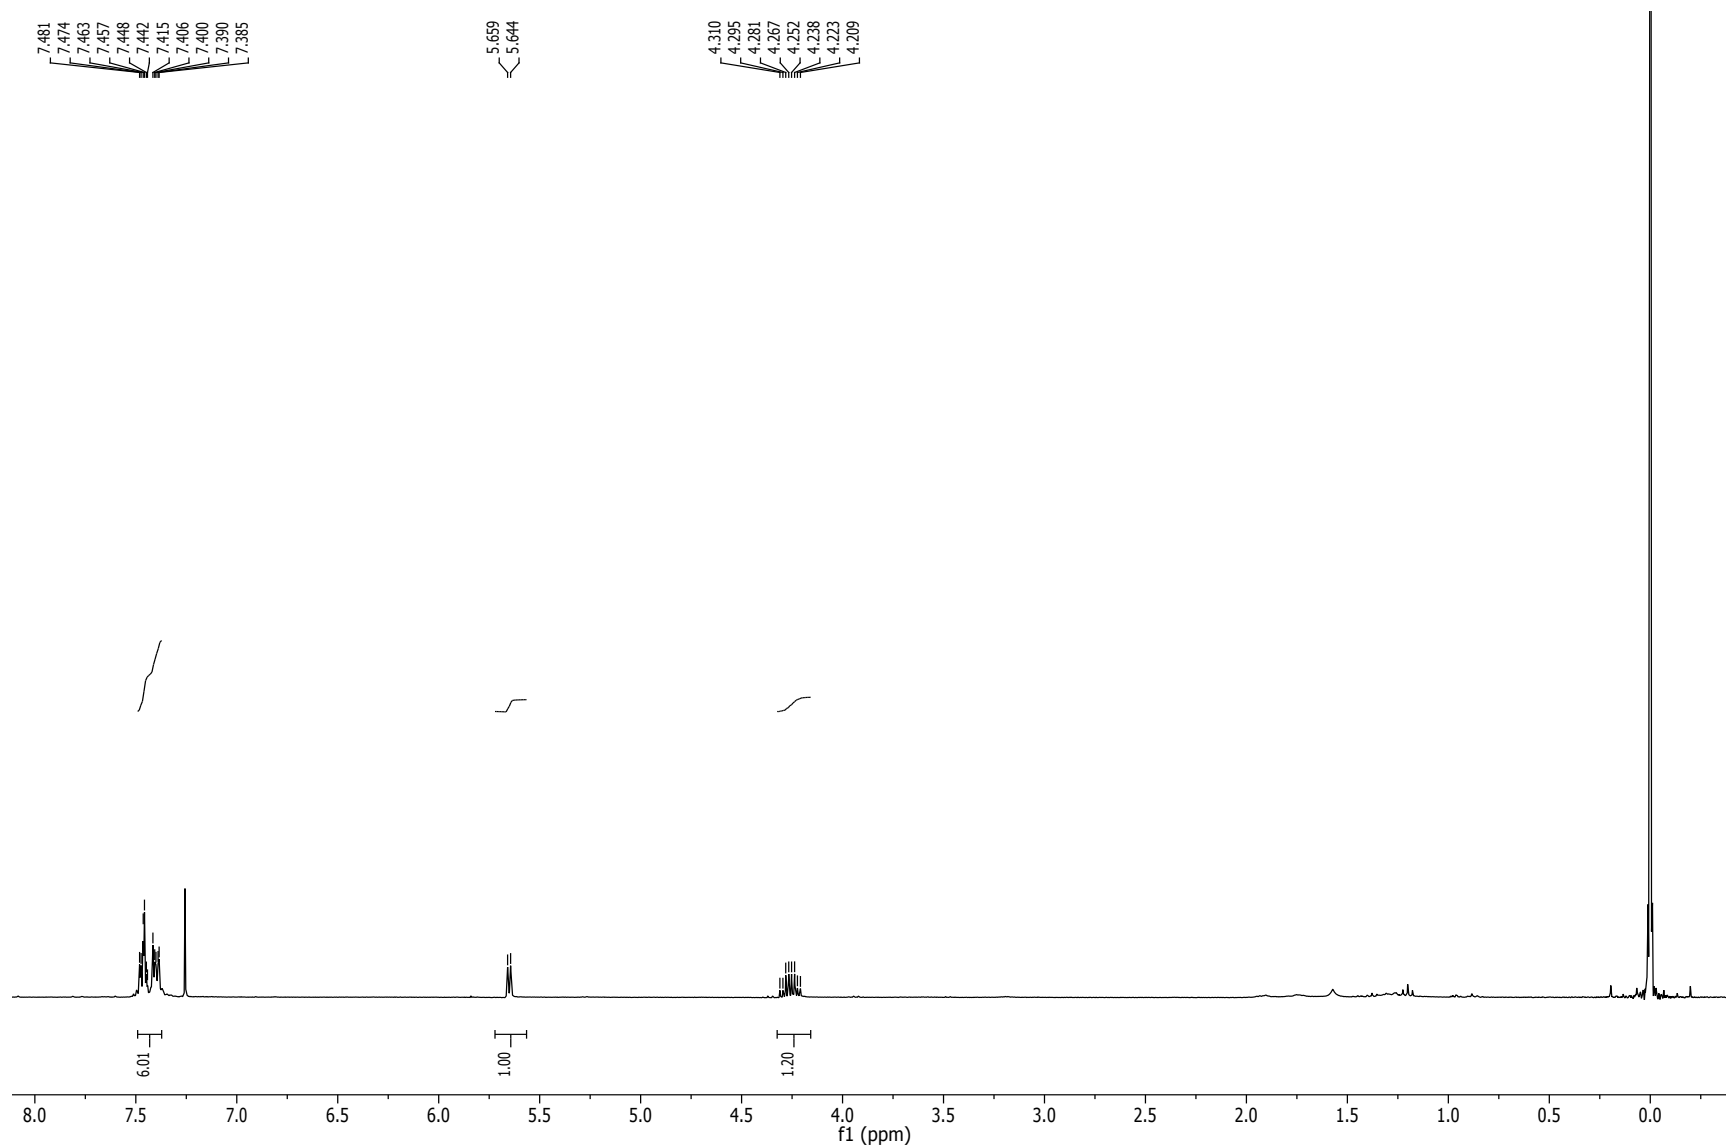

<sup>1</sup>H NMR Spectrum of *anti*-4-phenyl-3-(trifluoromethyl)oxetan-2-one (**2a**)

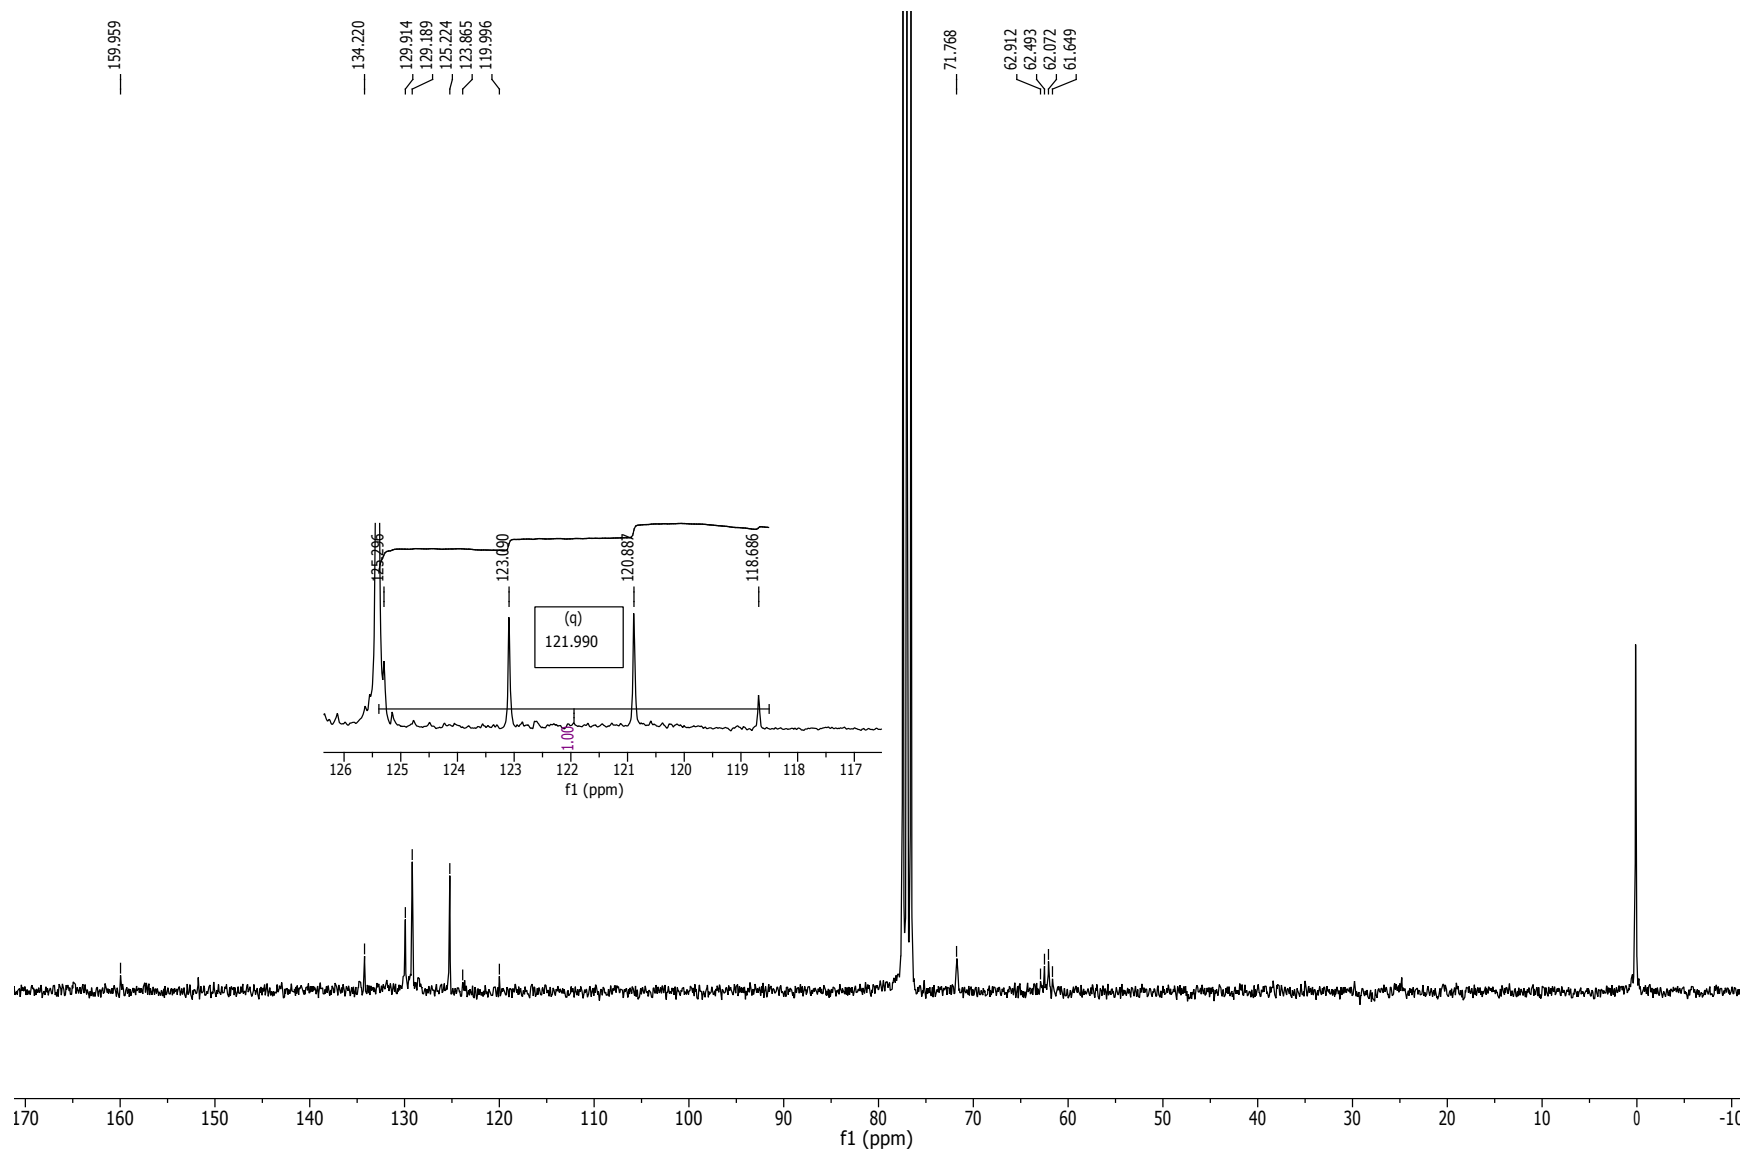

<sup>13</sup>C NMR Spectrum of *anti*-4-phenyl-3-(trifluoromethyl)oxetan-2-one (**2a**)

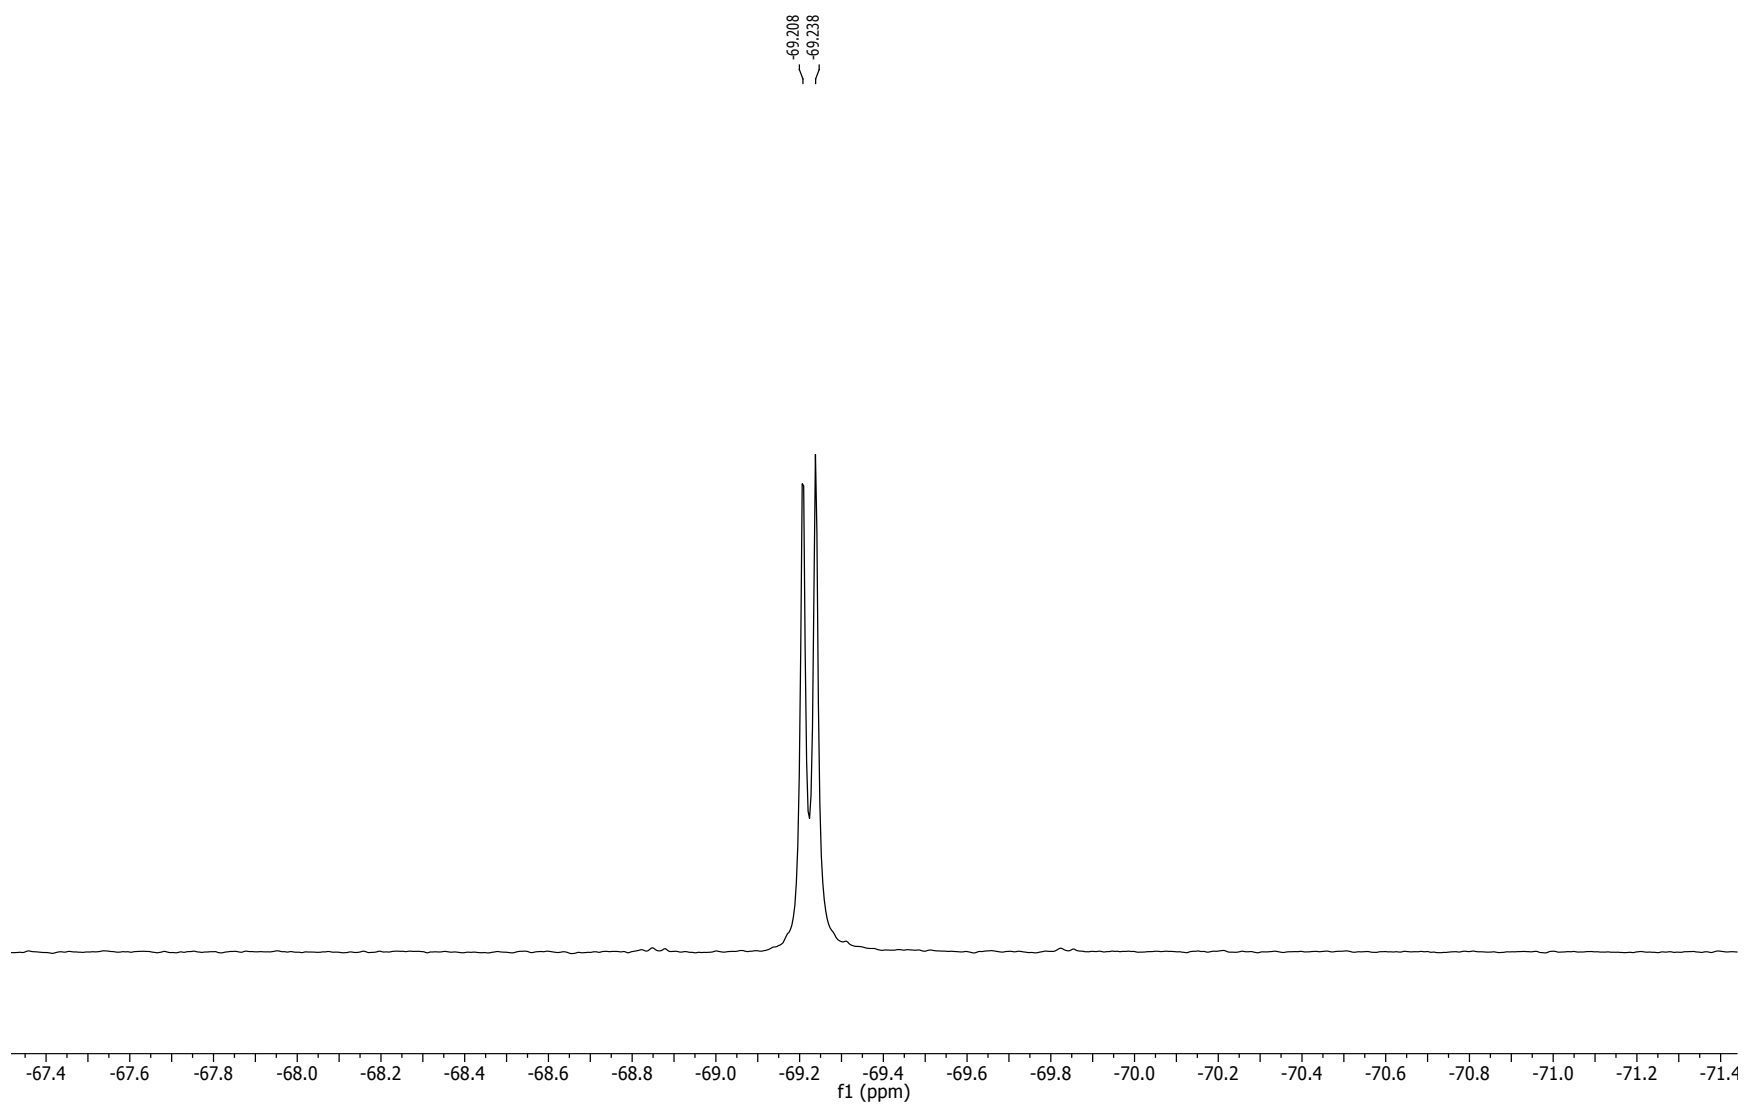

$^{19}\text{F}$  NMR Spectrum of *anti*-4-phenyl-3-(trifluoromethyl)oxetan-2-one (**2a**)

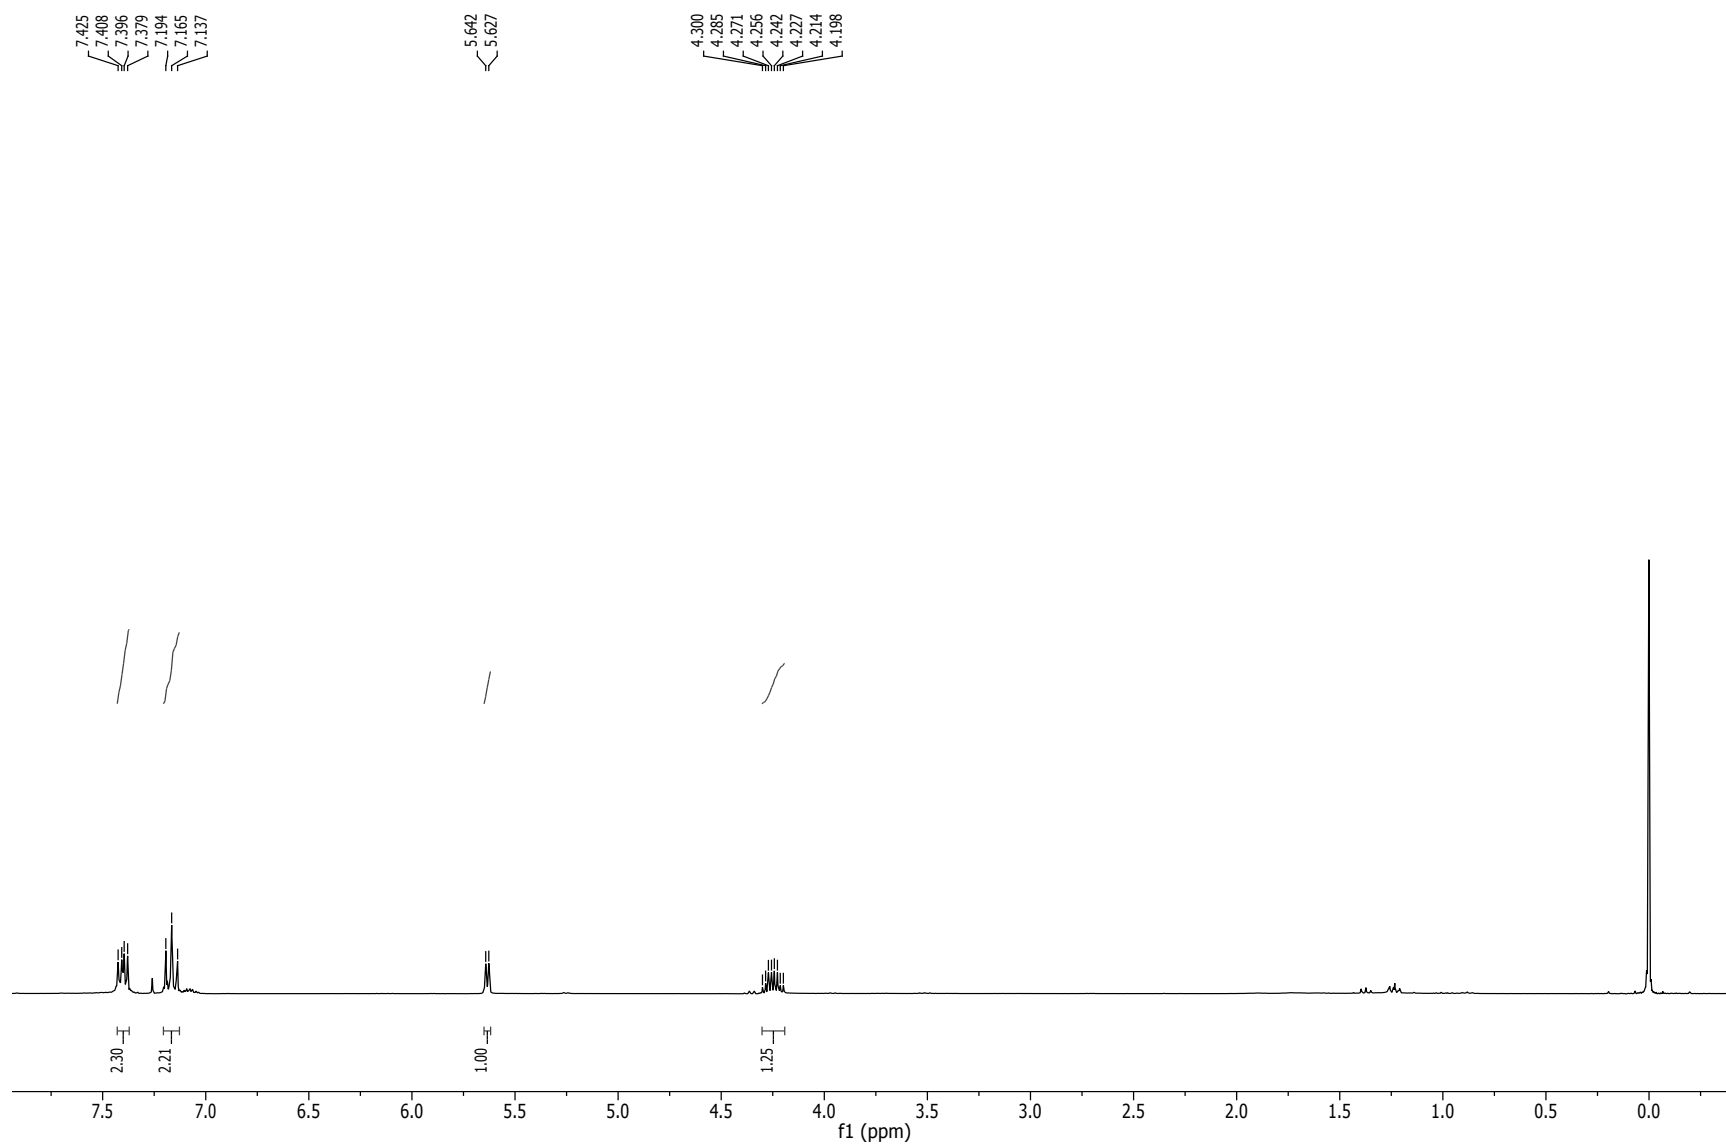

$^1\text{H}$  NMR Spectrum of *anti*-4-(4-fluorophenyl)-3-(trifluoromethyl)oxetan-2-one (**2c**)

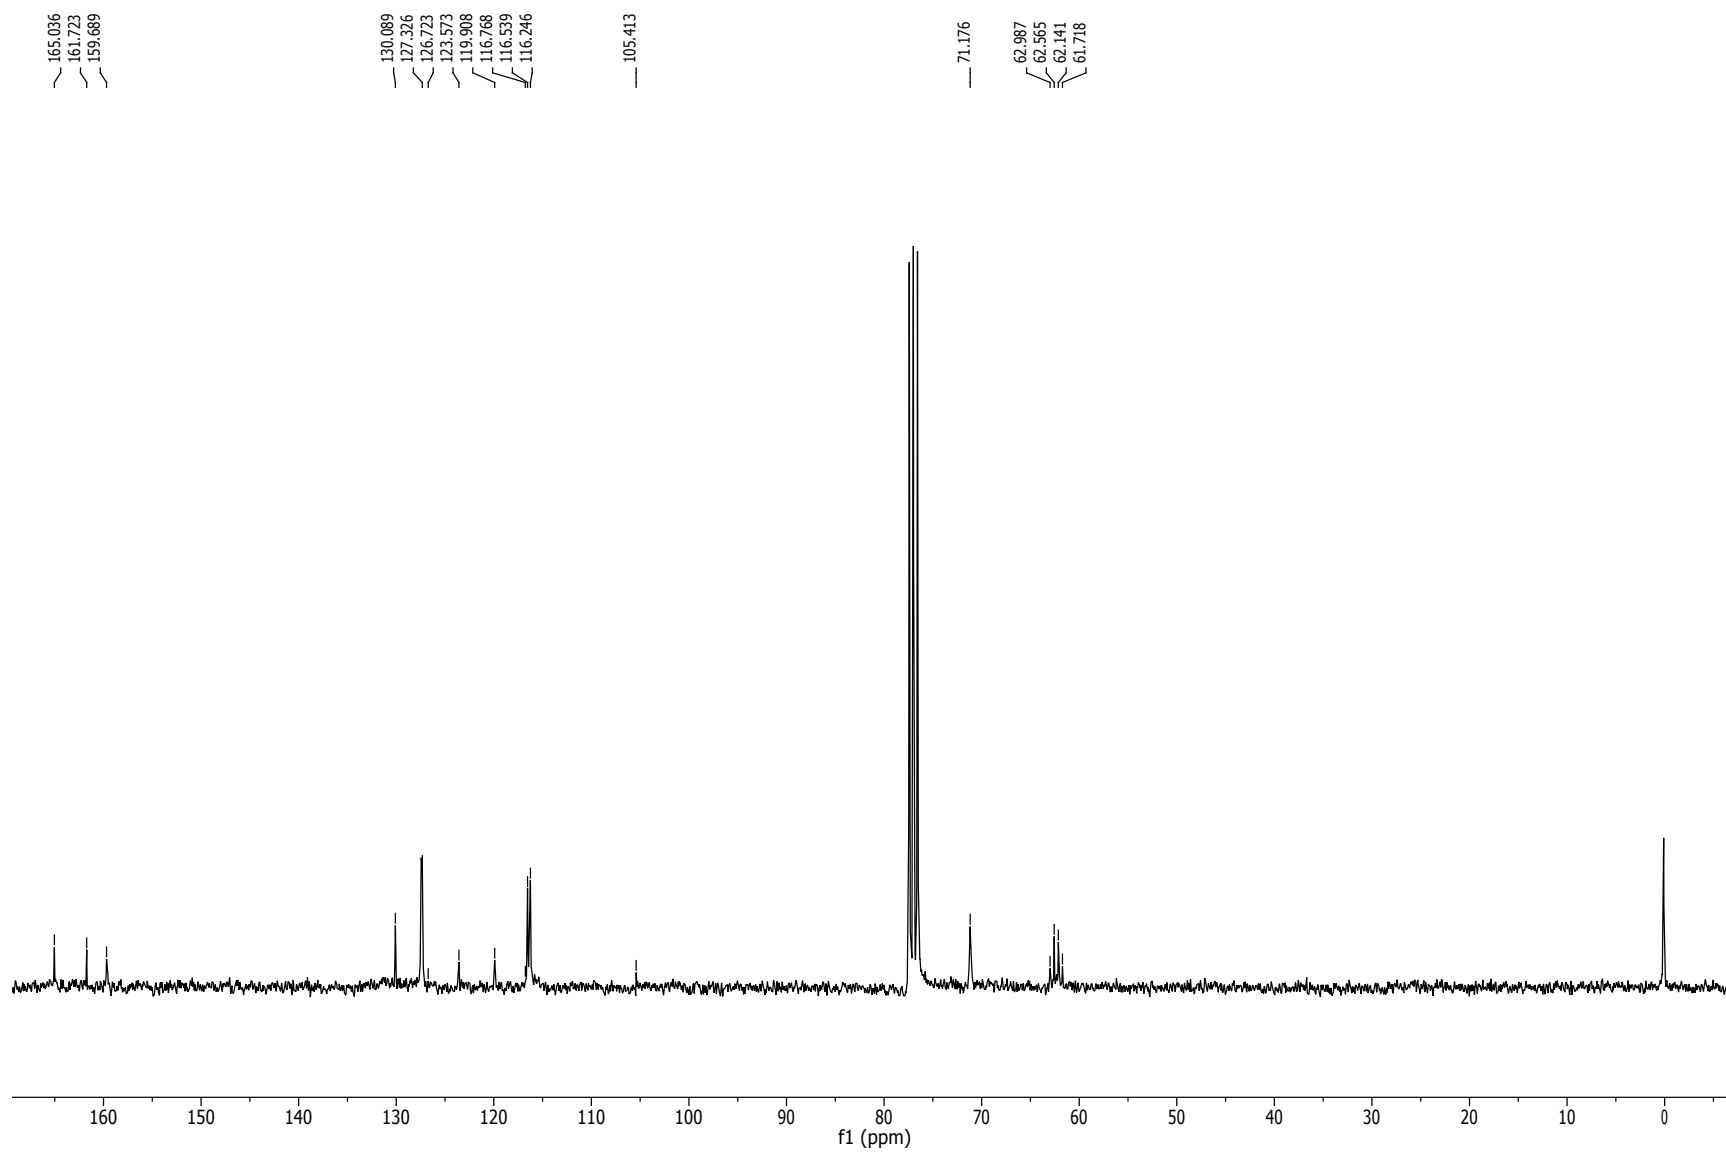

$^{13}\text{C}$  NMR Spectrum of *anti*-4-(4-fluorophenyl)-3-(trifluoromethyl)oxetan-2-one (**2c**)

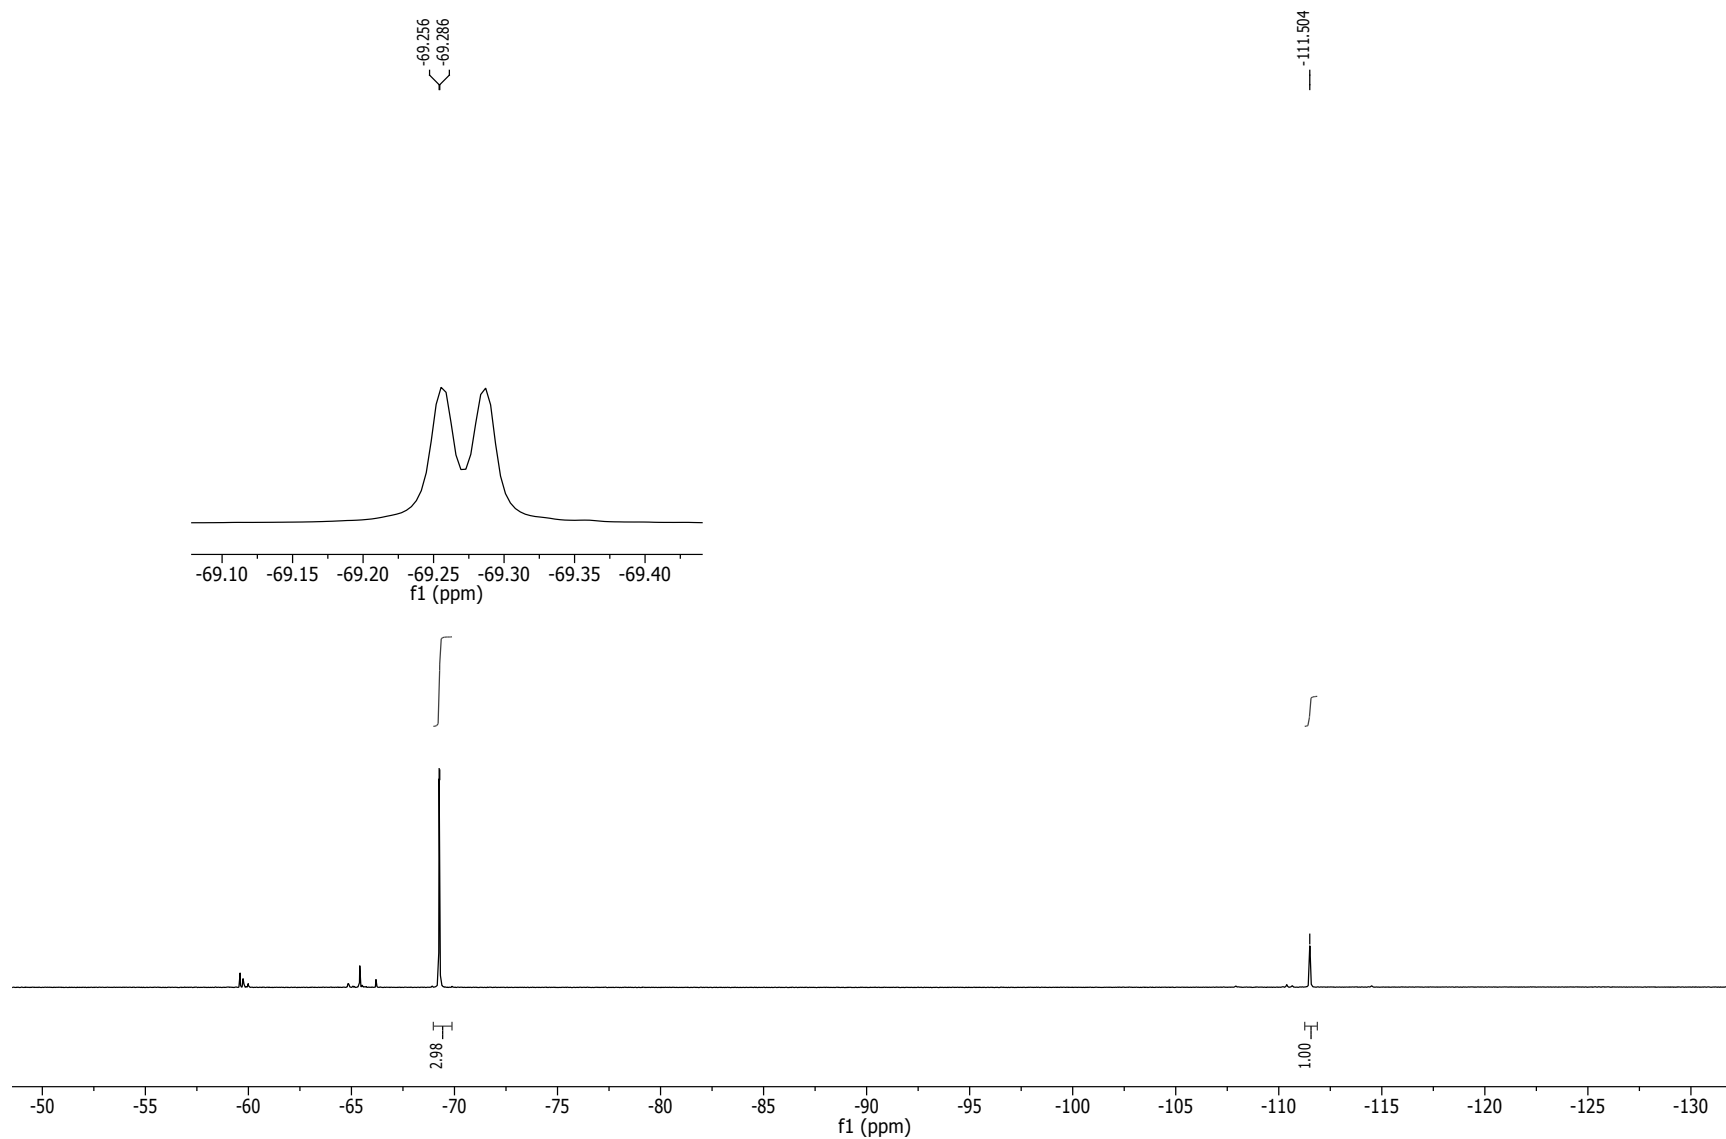

$^{19}\text{F}$  NMR Spectrum of *anti*-4-(4-fluorophenyl)-3-(trifluoromethyl)oxetan-2-one (**2c**)

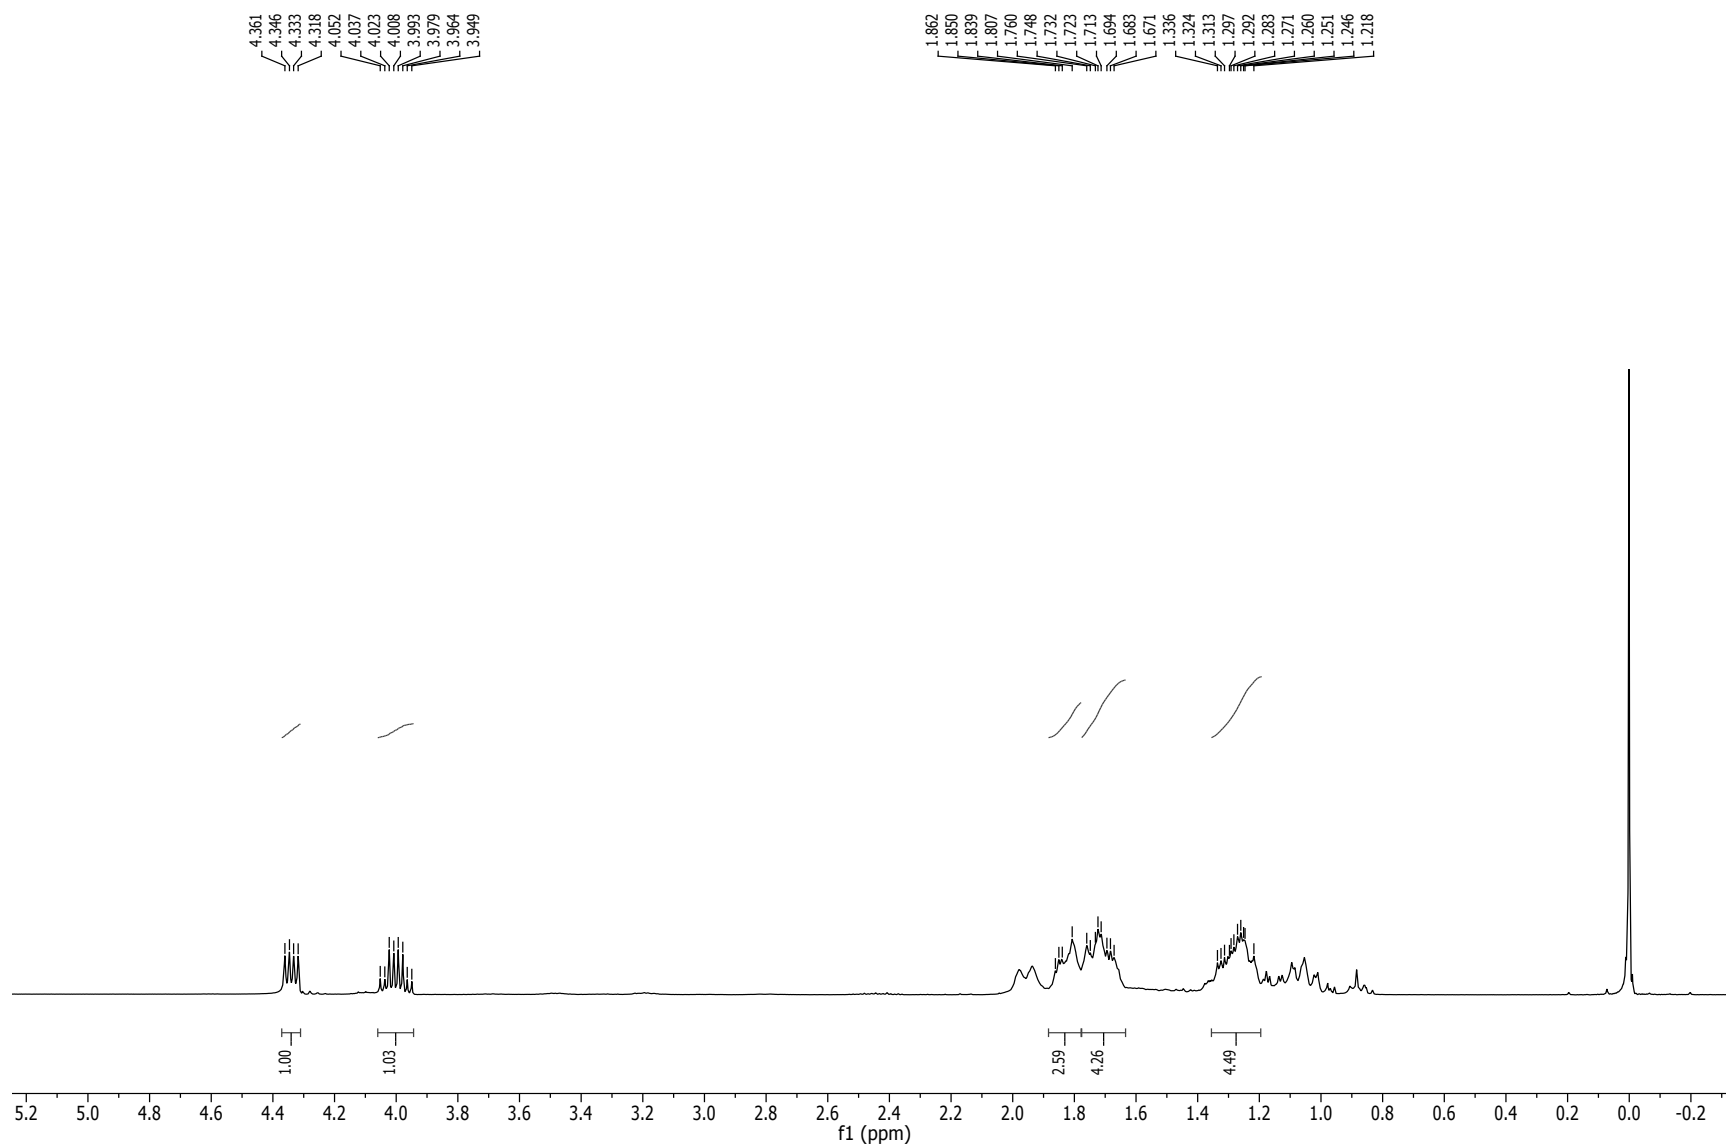

$^1\text{H}$  NMR Spectrum of *anti*-4-cyclohexyl-3-(trifluoromethyl)oxetan-2-one (**2h**)

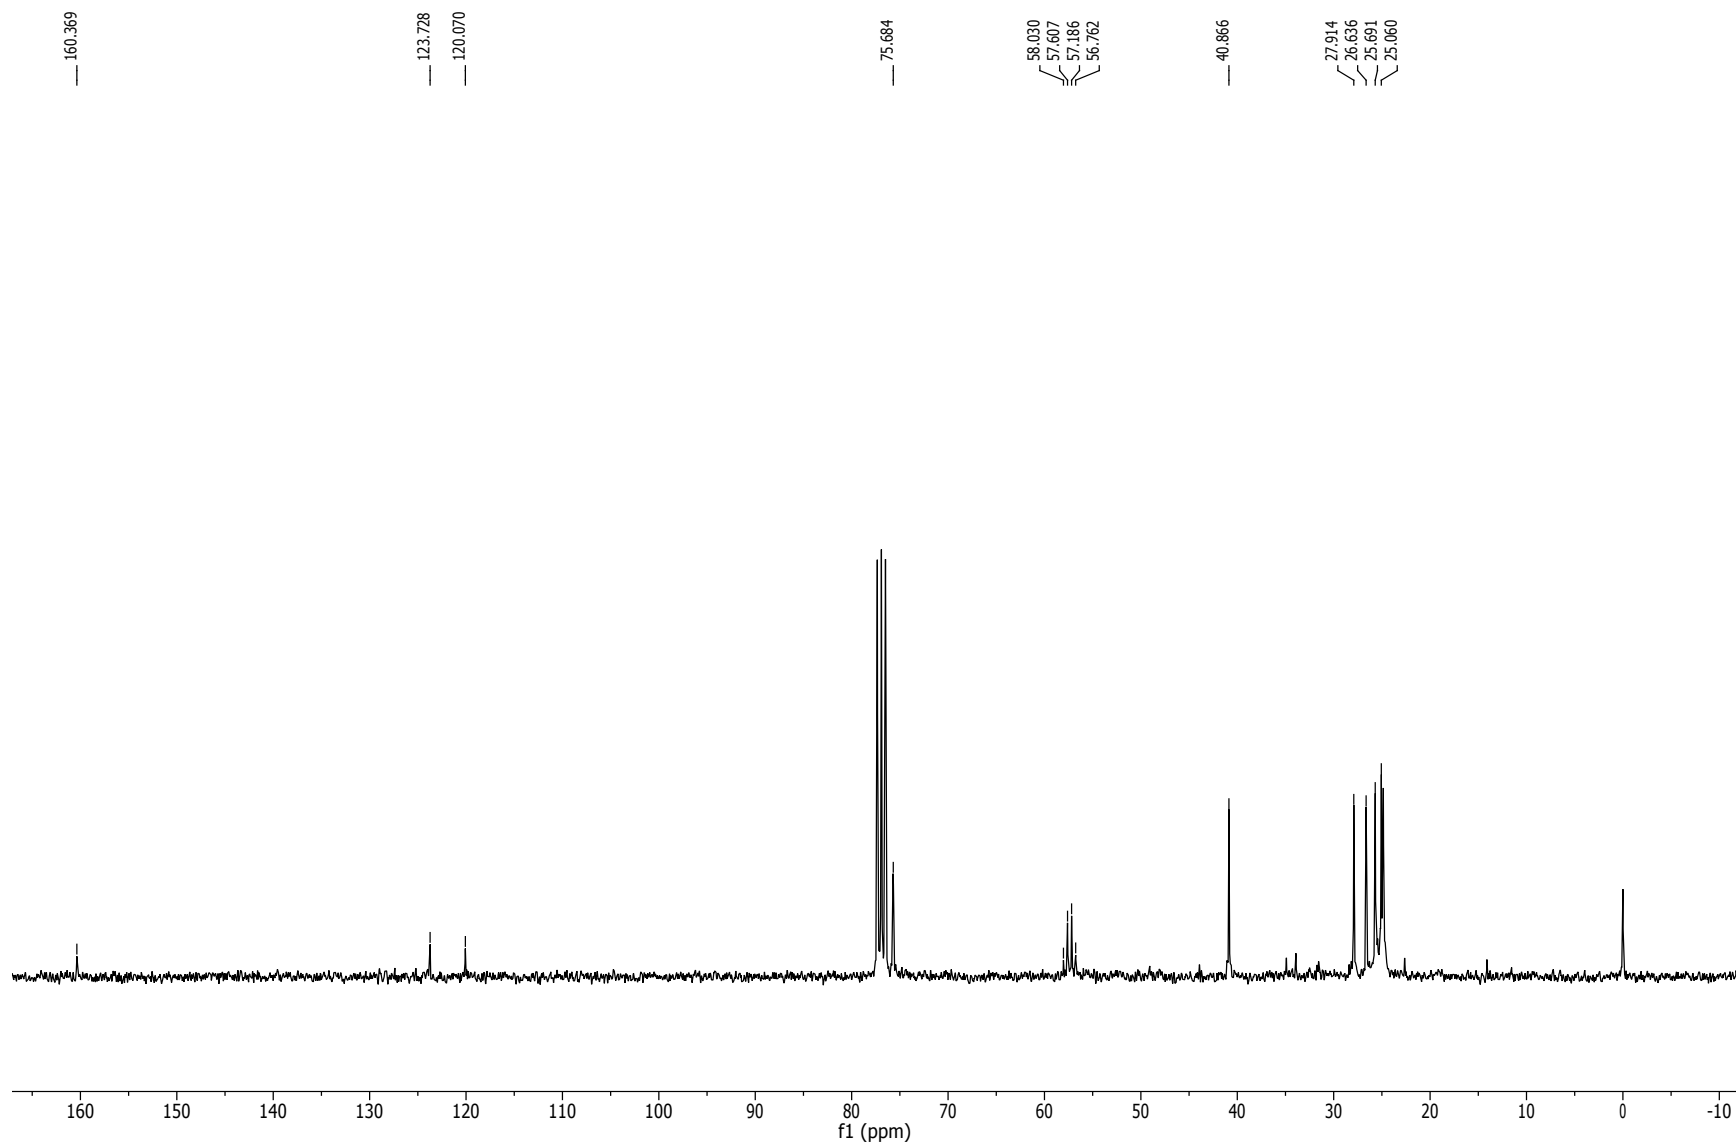

$^{13}\text{C}$  NMR Spectrum of *anti*-4-cyclohexyl-3-(trifluoromethyl)oxetan-2-one (**2h**)



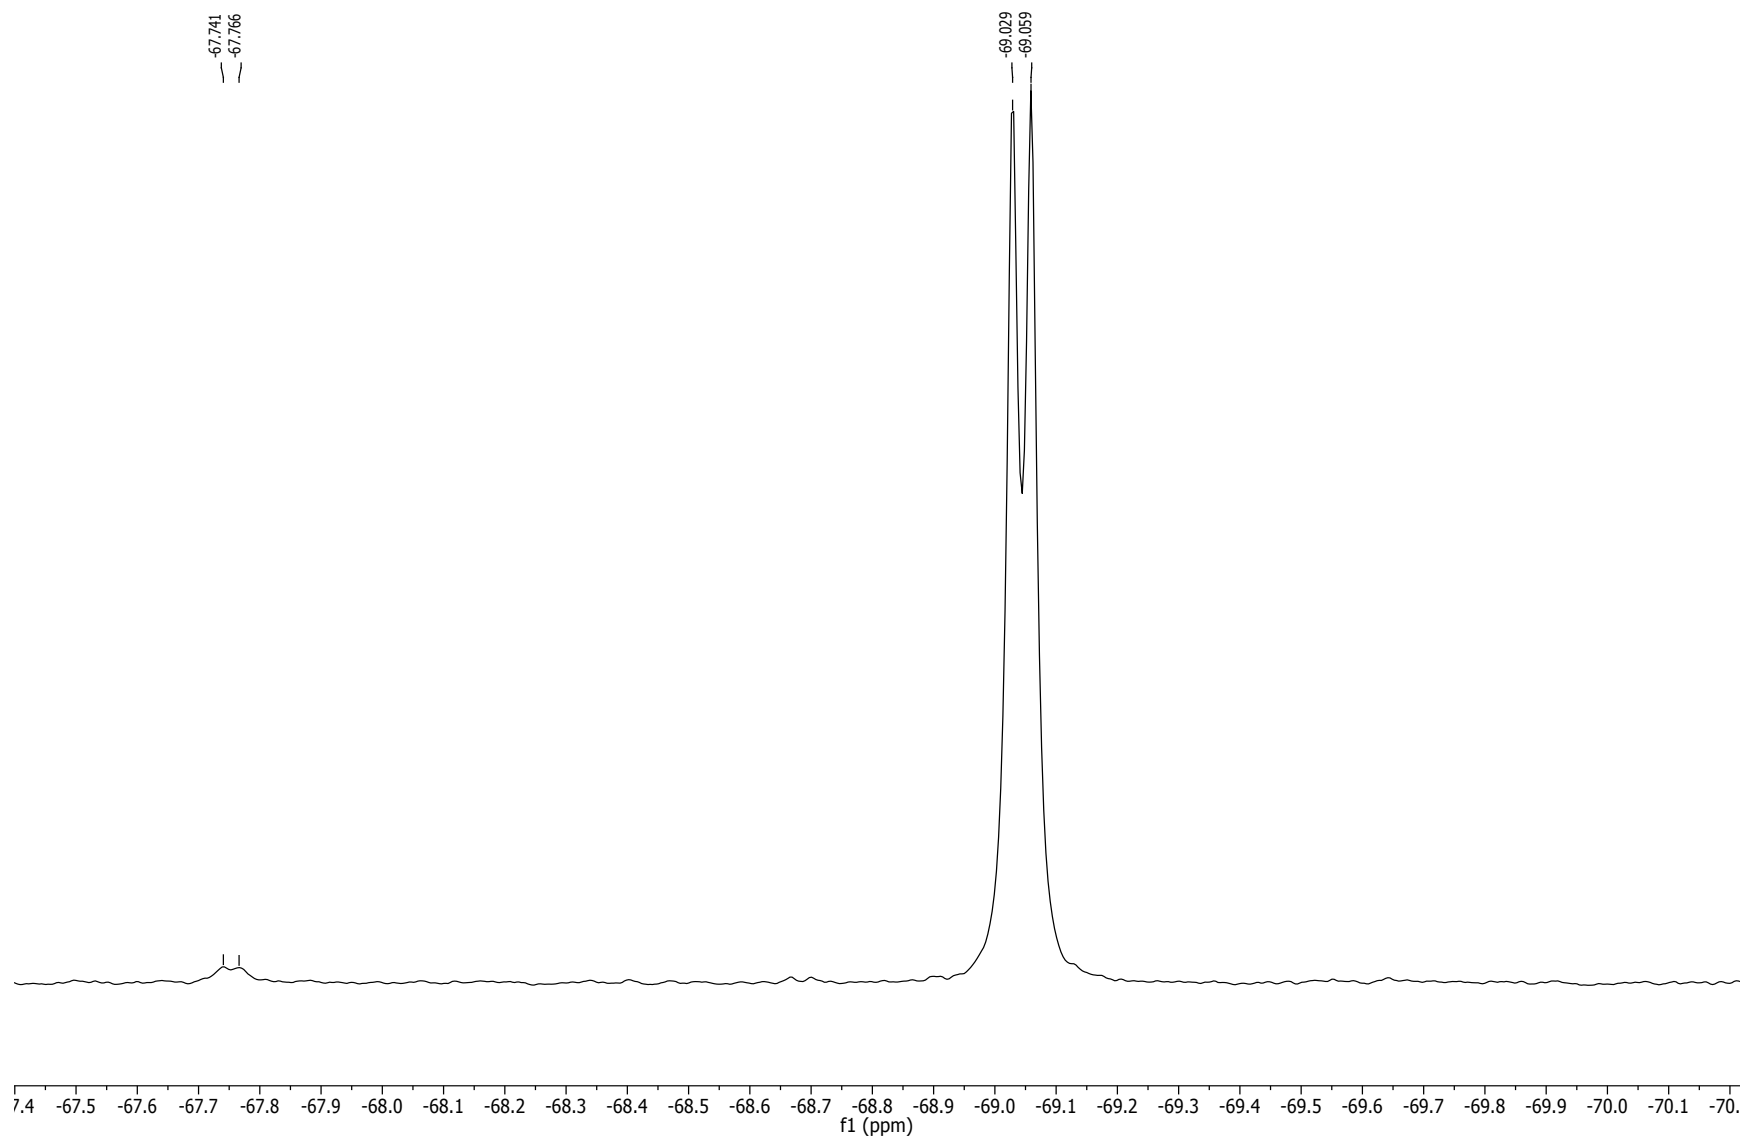

$^{19}\text{F}$  NMR Spectrum of *anti*-4-cyclohexyl-3-(trifluoromethyl)oxetan-2-one (**2h**)

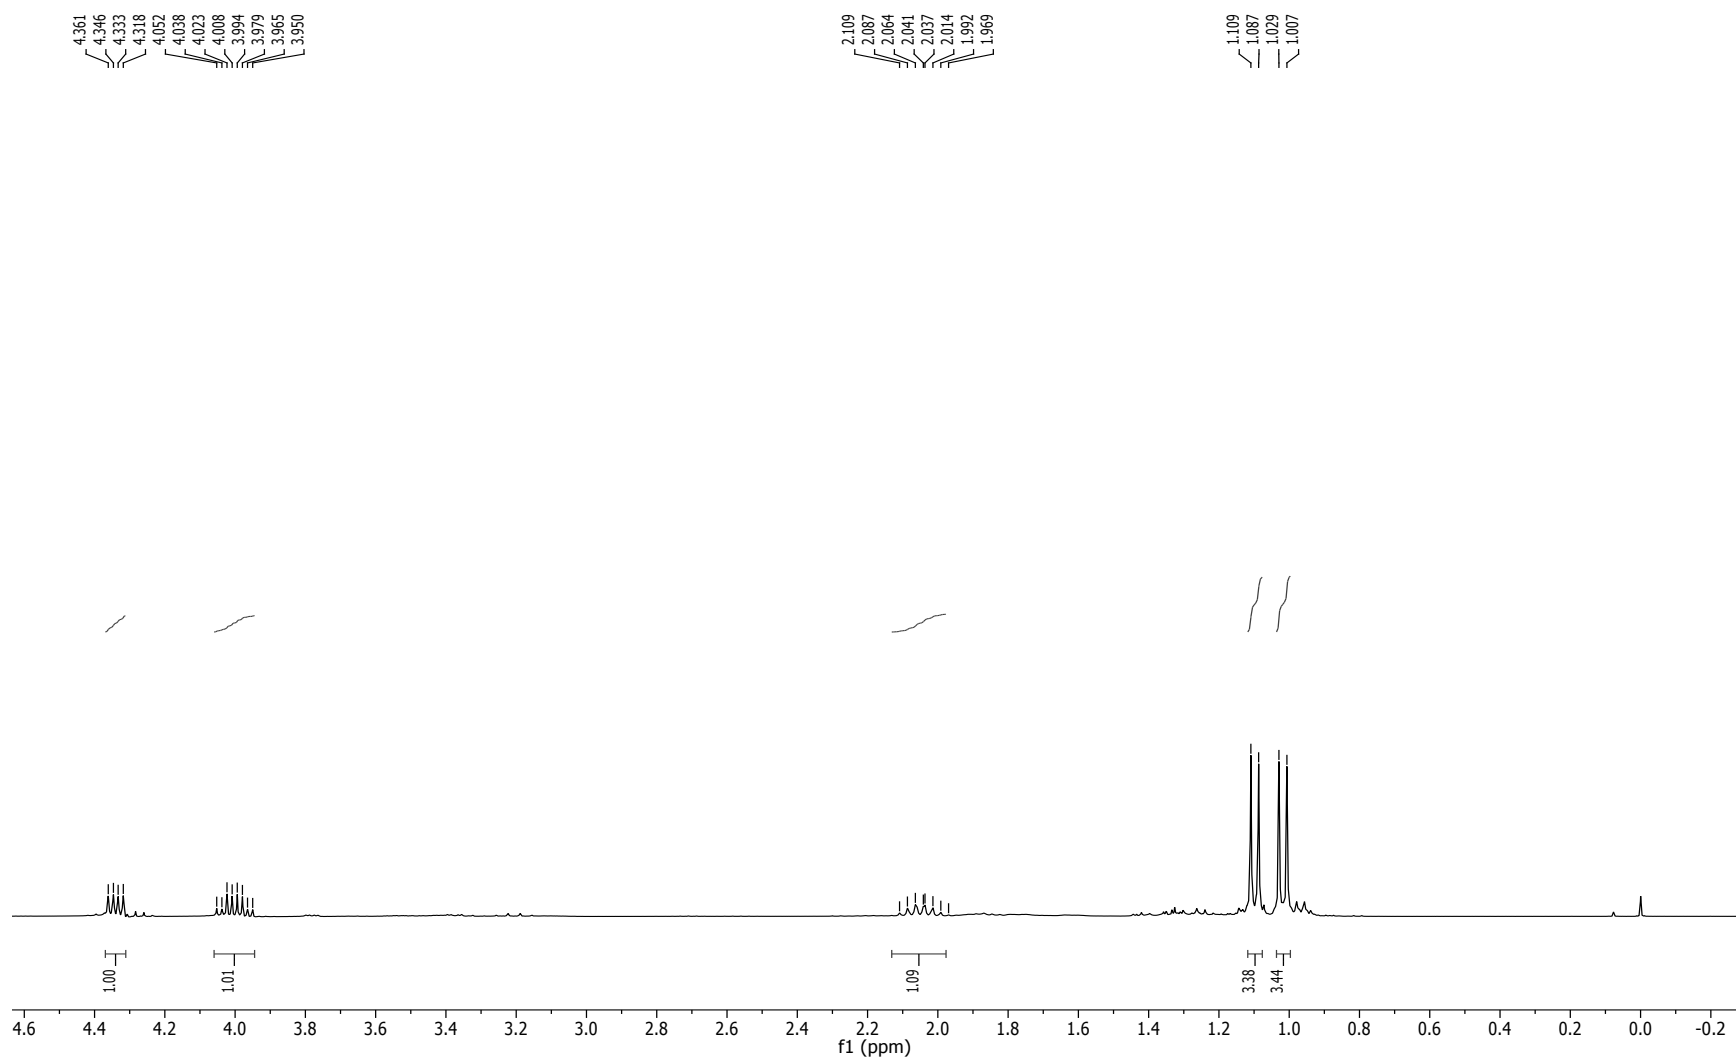

$^1\text{H}$  NMR Spectrum of *anti*-4-isopropyl-3-(trifluoromethyl)oxetan-2-one (**2i**)

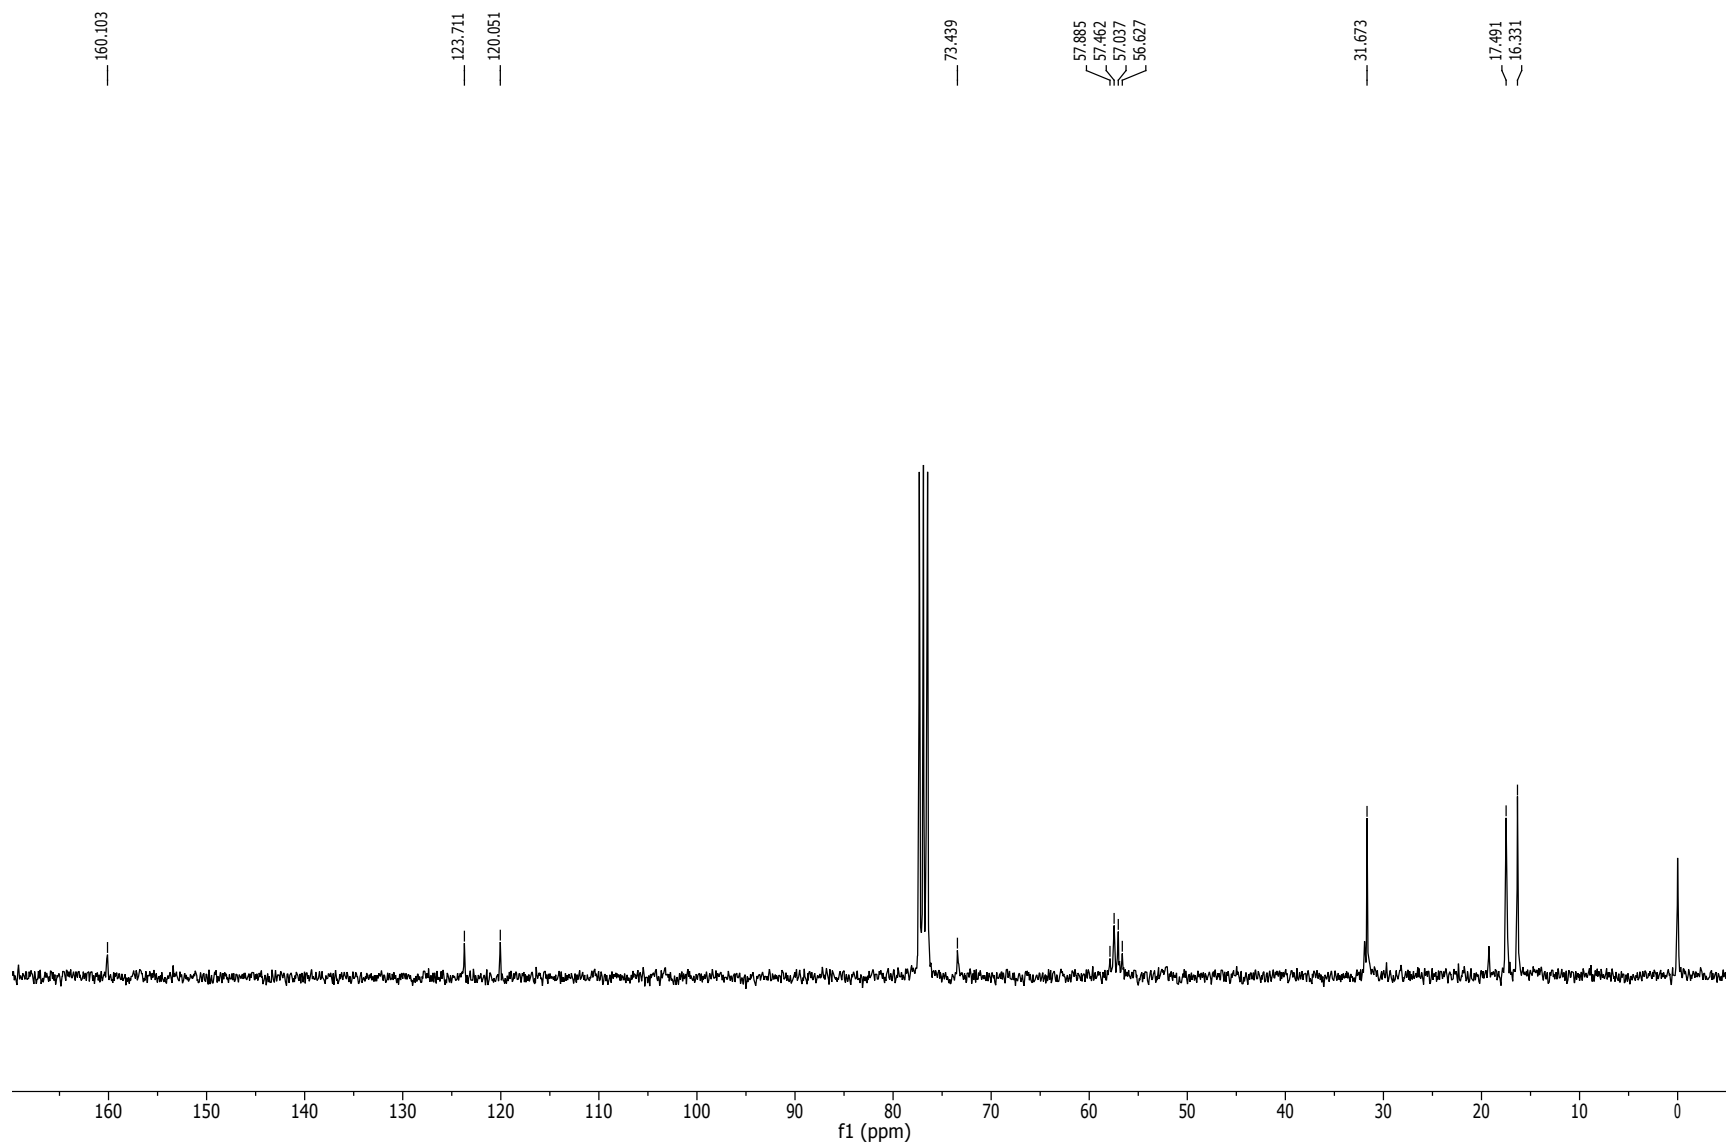

<sup>13</sup>C NMR Spectrum of *anti*-4-isopropyl-3-(trifluoromethyl)oxetan-2-one (**2i**)

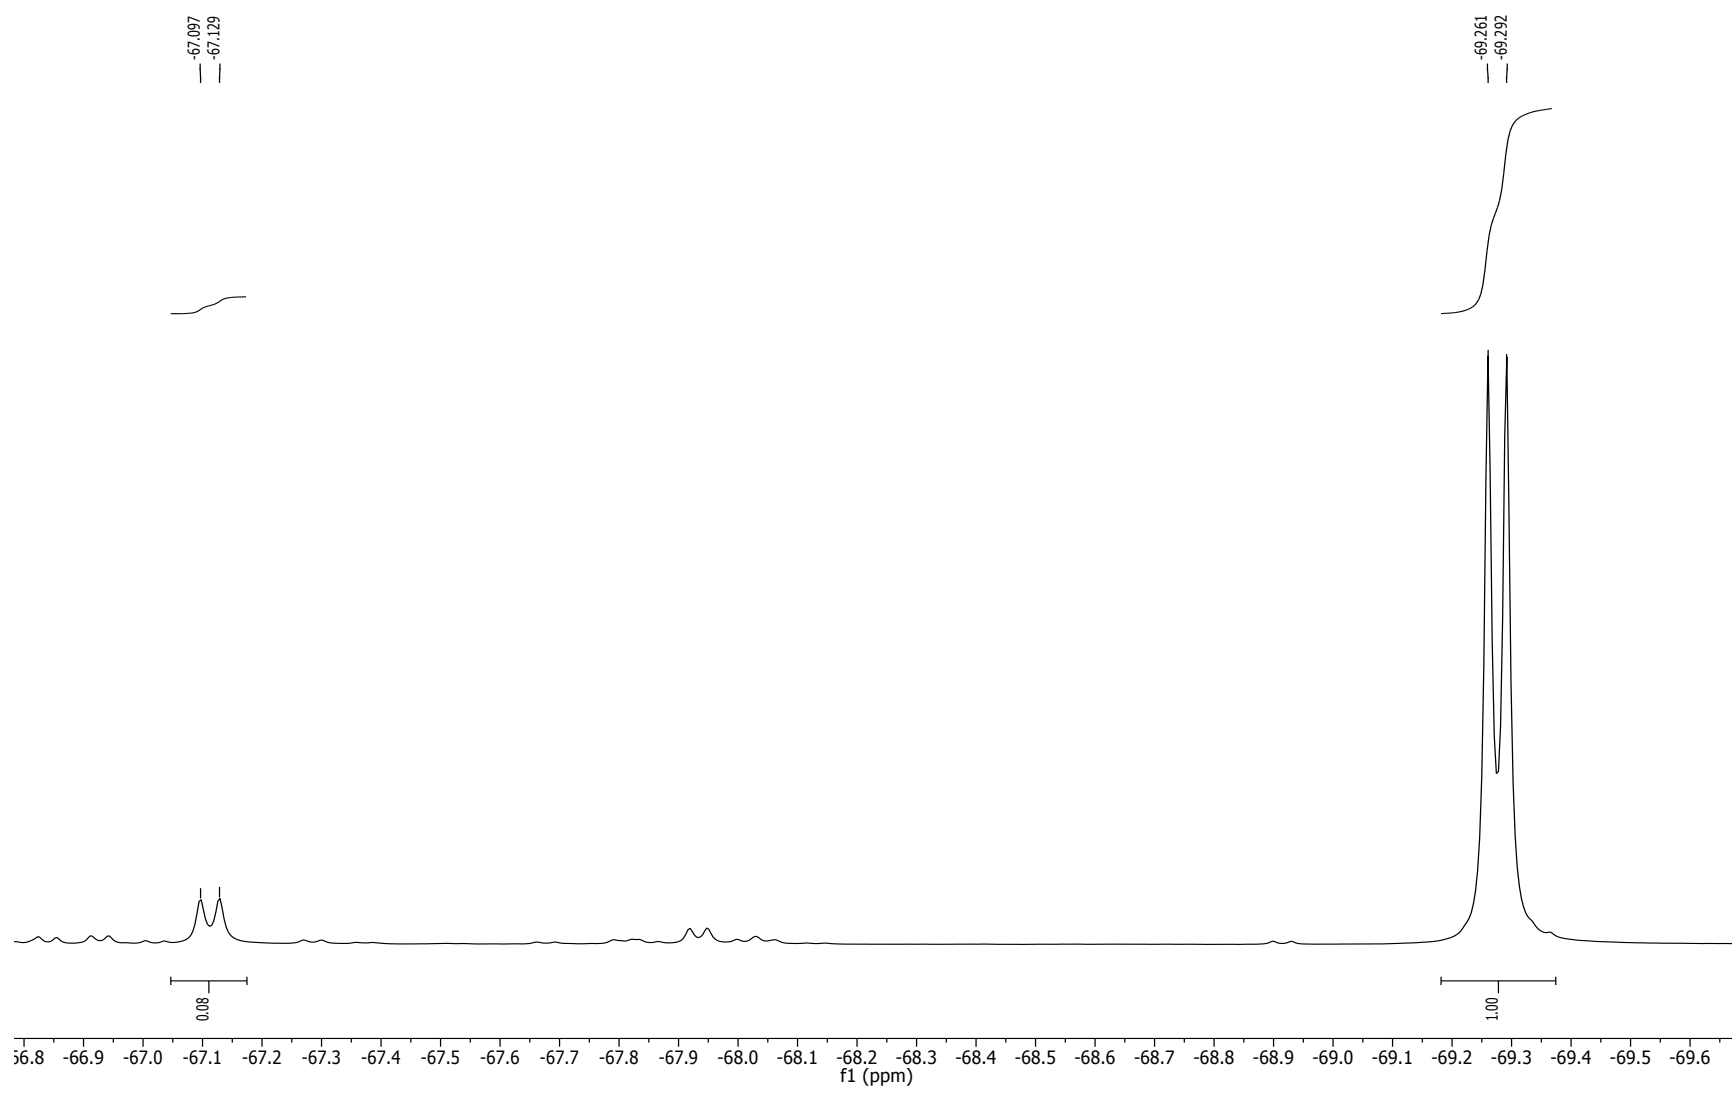

<sup>19</sup>F NMR Spectrum of *anti*-4-isopropyl-3-(trifluoromethyl)oxetan-2-one (**2i**)

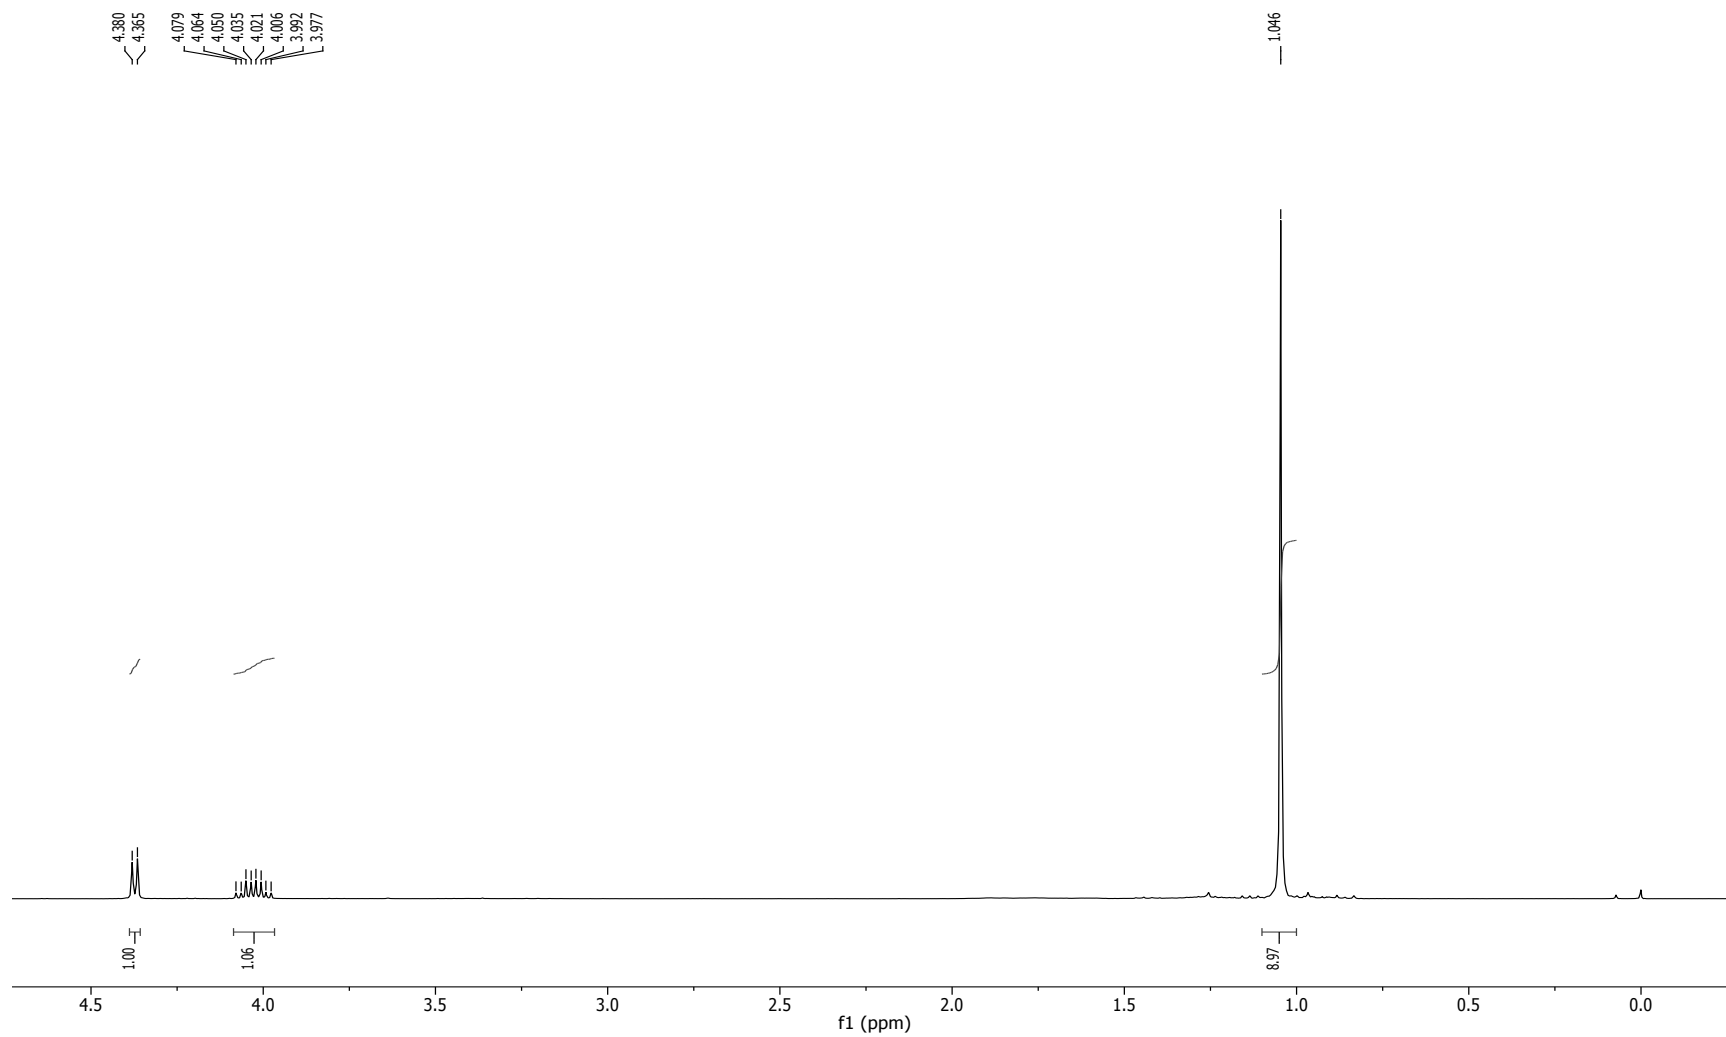

$^1\text{H}$  NMR Spectrum of *anti*-4-(tert-butyl)-3-(trifluoromethyl)oxetan-2-one (**2j**)

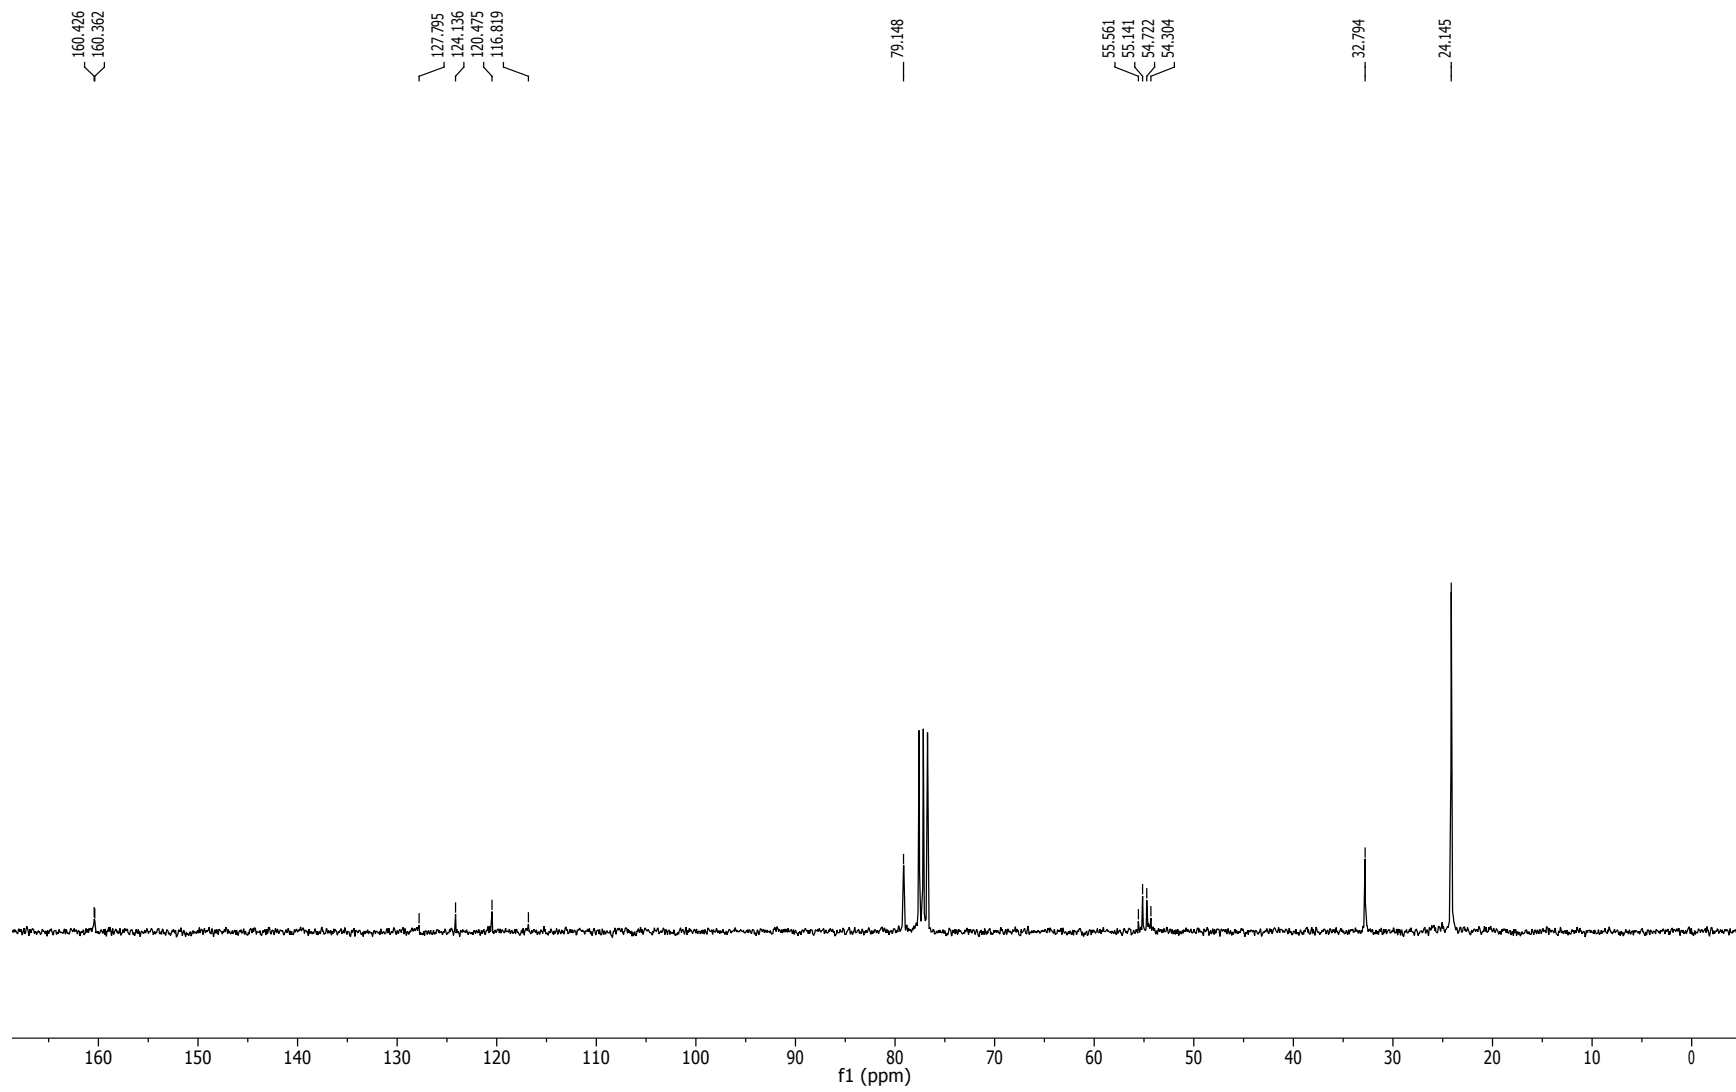

$^{13}\text{C}$  NMR Spectrum of *anti*-4-(tert-butyl)-3-(trifluoromethyl)oxetan-2-one (**2j**)

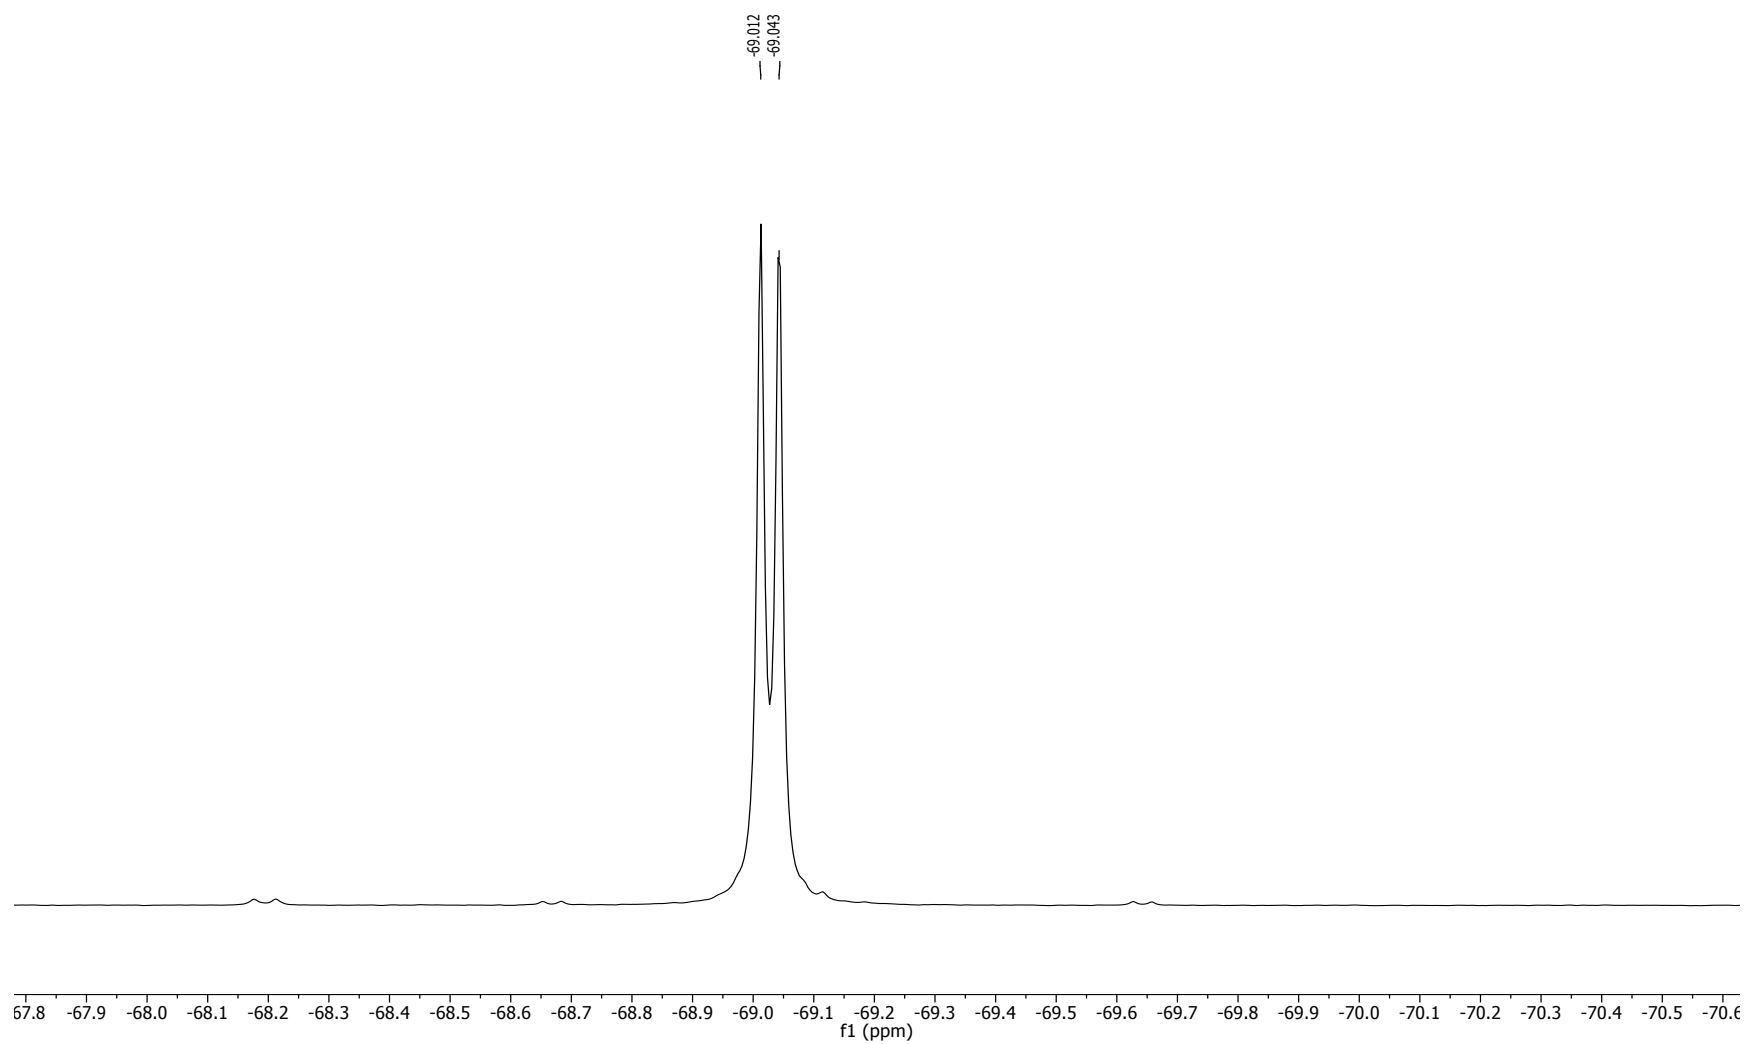

$^{19}\text{F}$  NMR Spectrum of *anti*-4-(tert-butyl)-3-(trifluoromethyl)oxetan-2-one (**2j**)

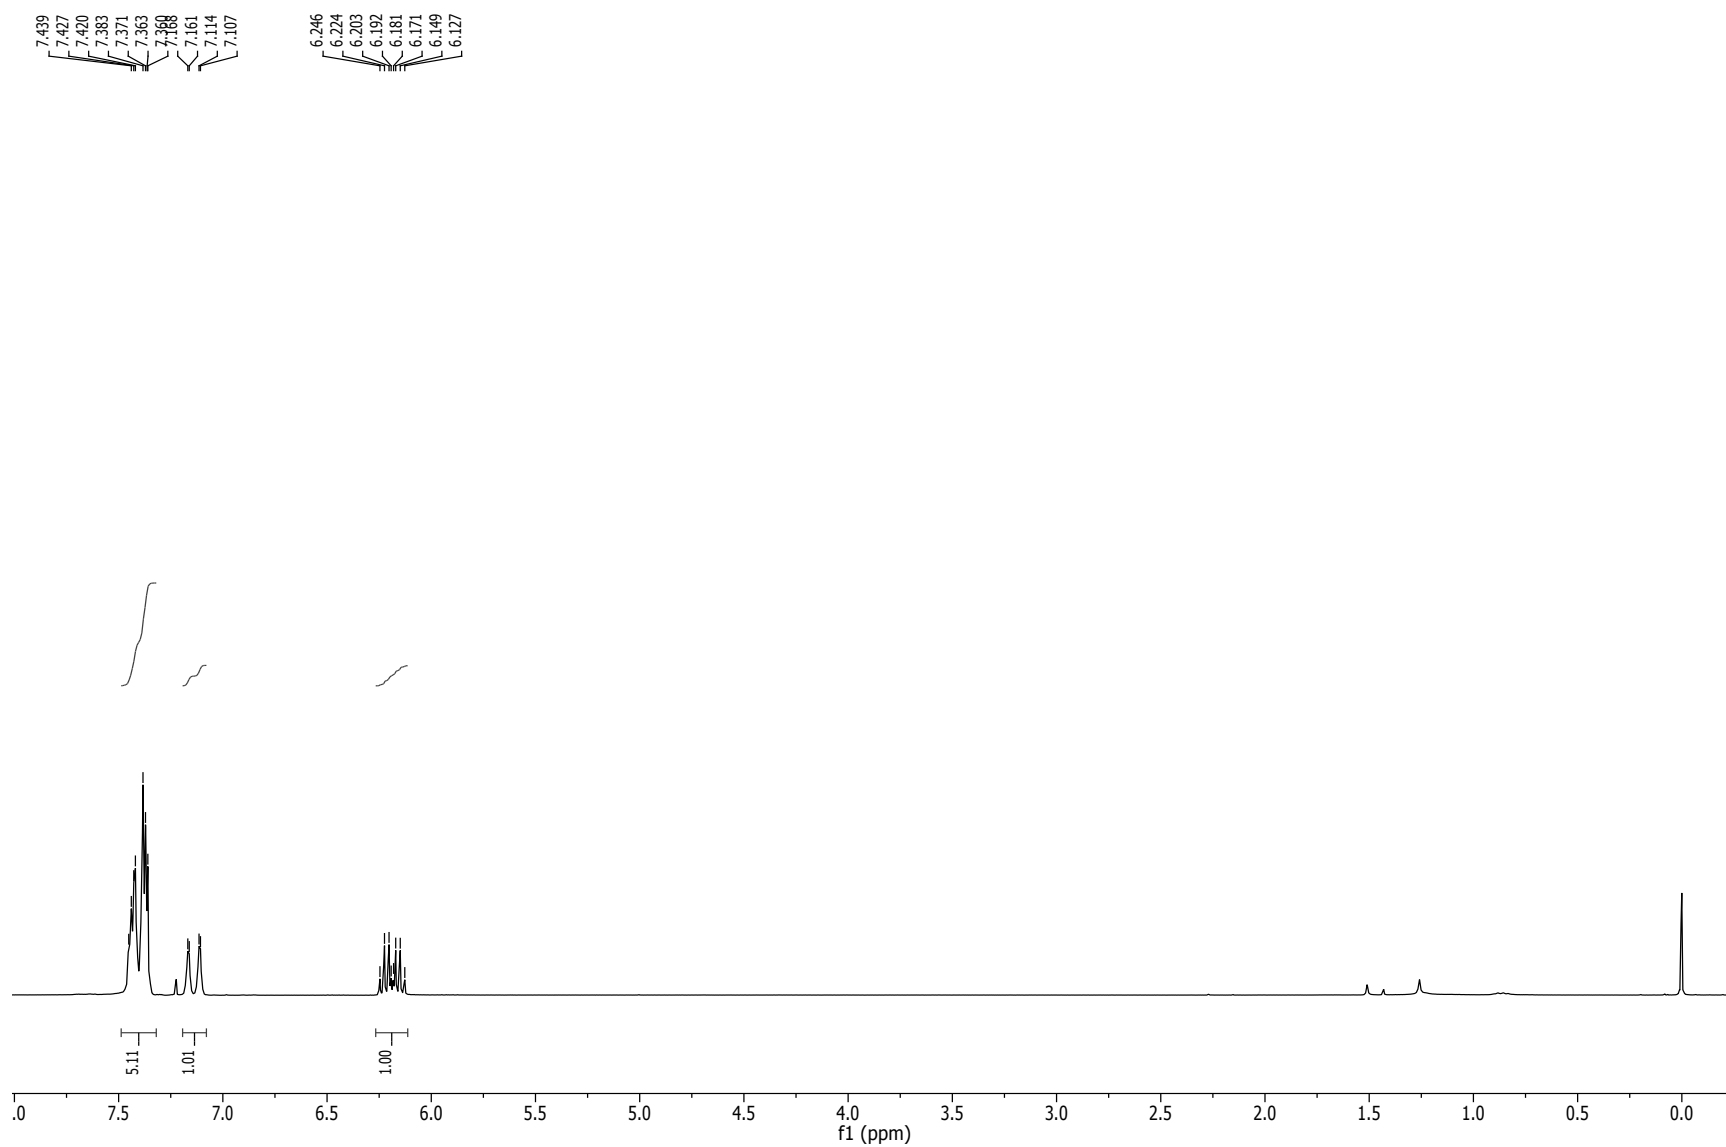

$^1\text{H}$  NMR Spectrum of (*E*)-(3,3,3-trifluoroprop-1-en-1-yl)benzene (**3a**)



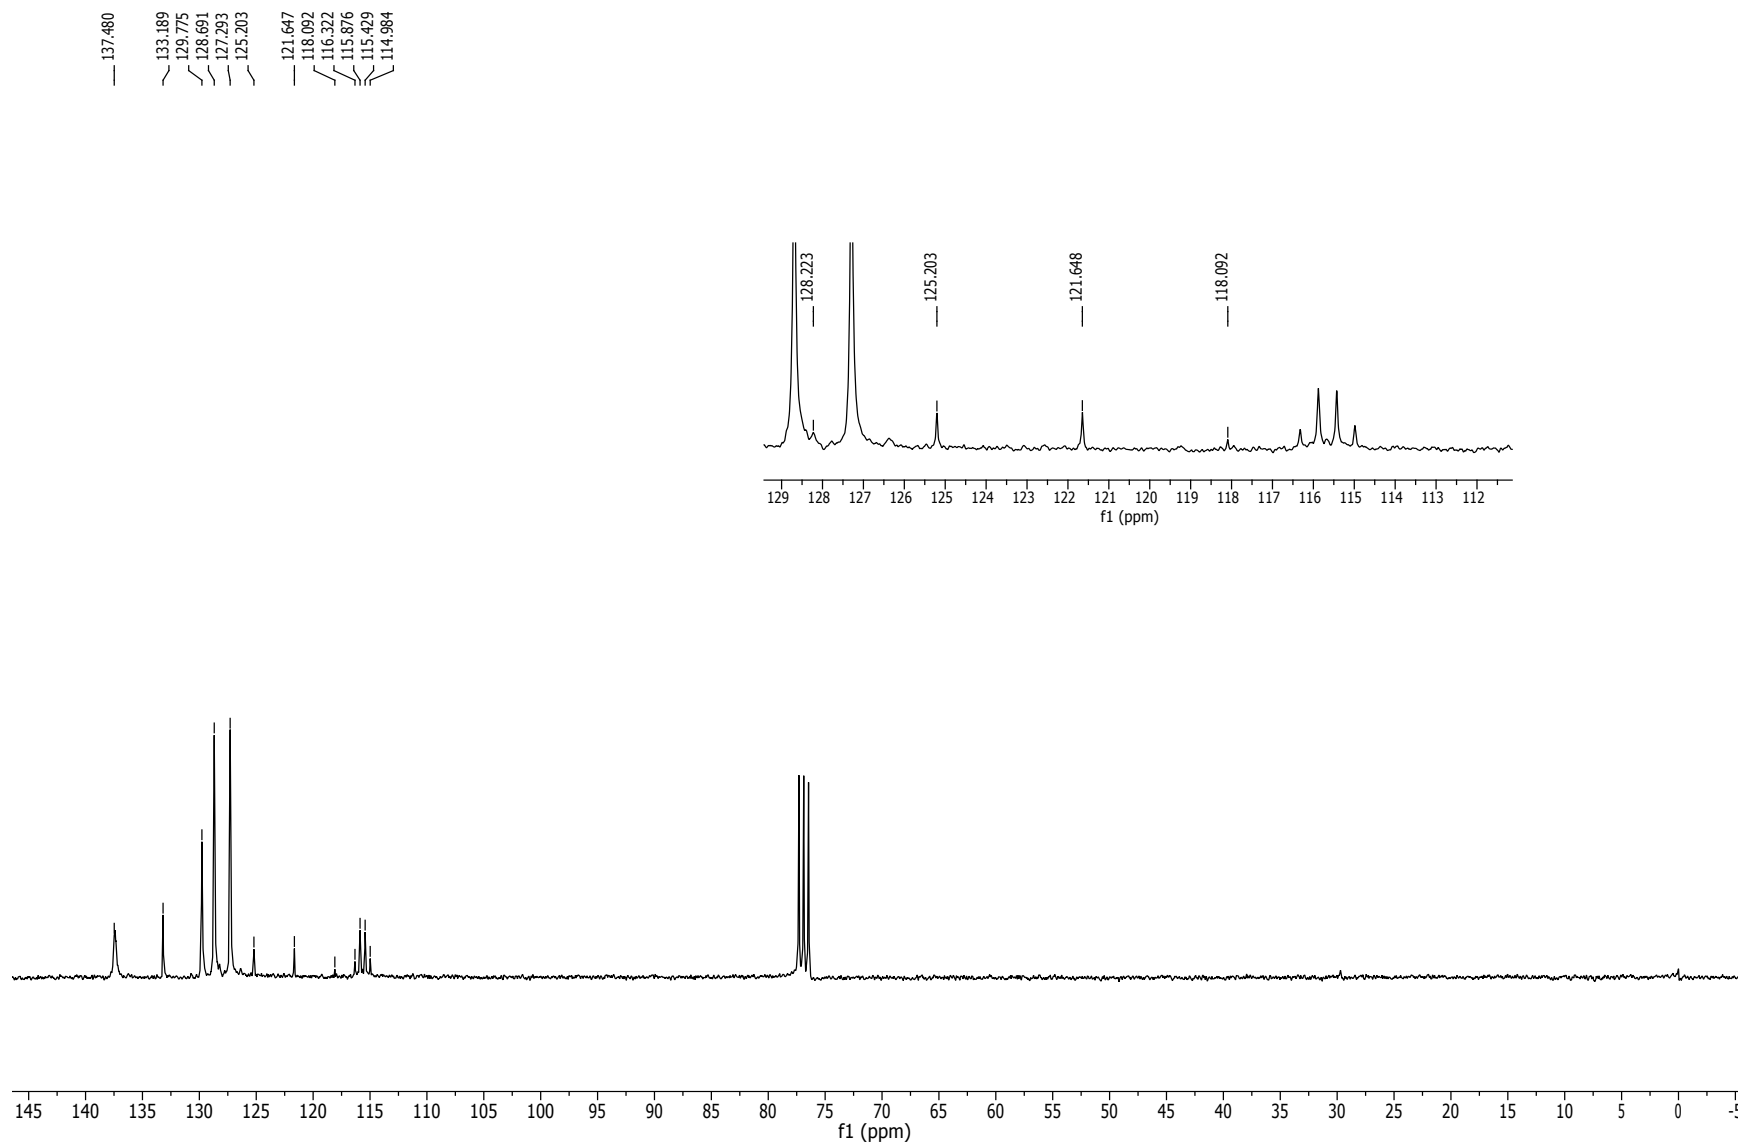

<sup>13</sup>C NMR Spectrum of (*E*)-(3,3,3-trifluoroprop-1-en-1-yl)benzene (**3a**)

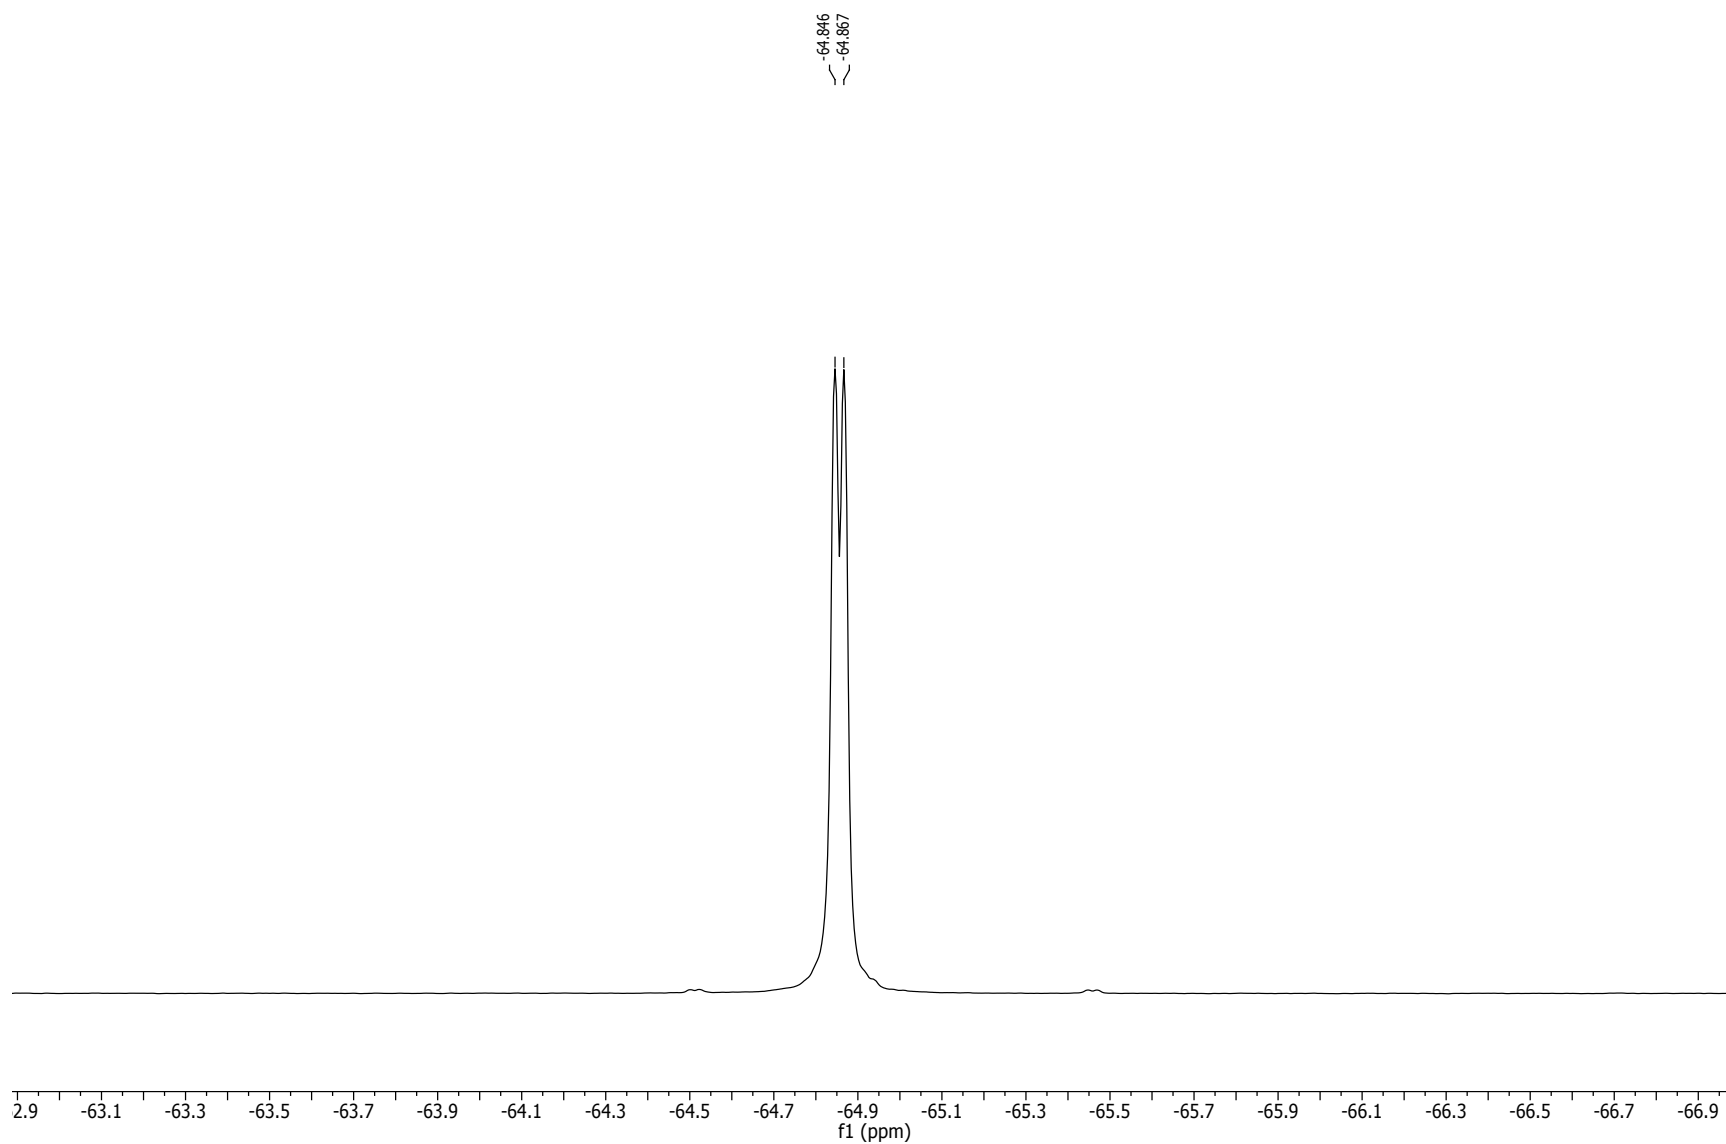

$^{19}\text{F}$  NMR Spectrum of (*E*)-(3,3,3-trifluoroprop-1-en-1-yl)benzene (**3a**)

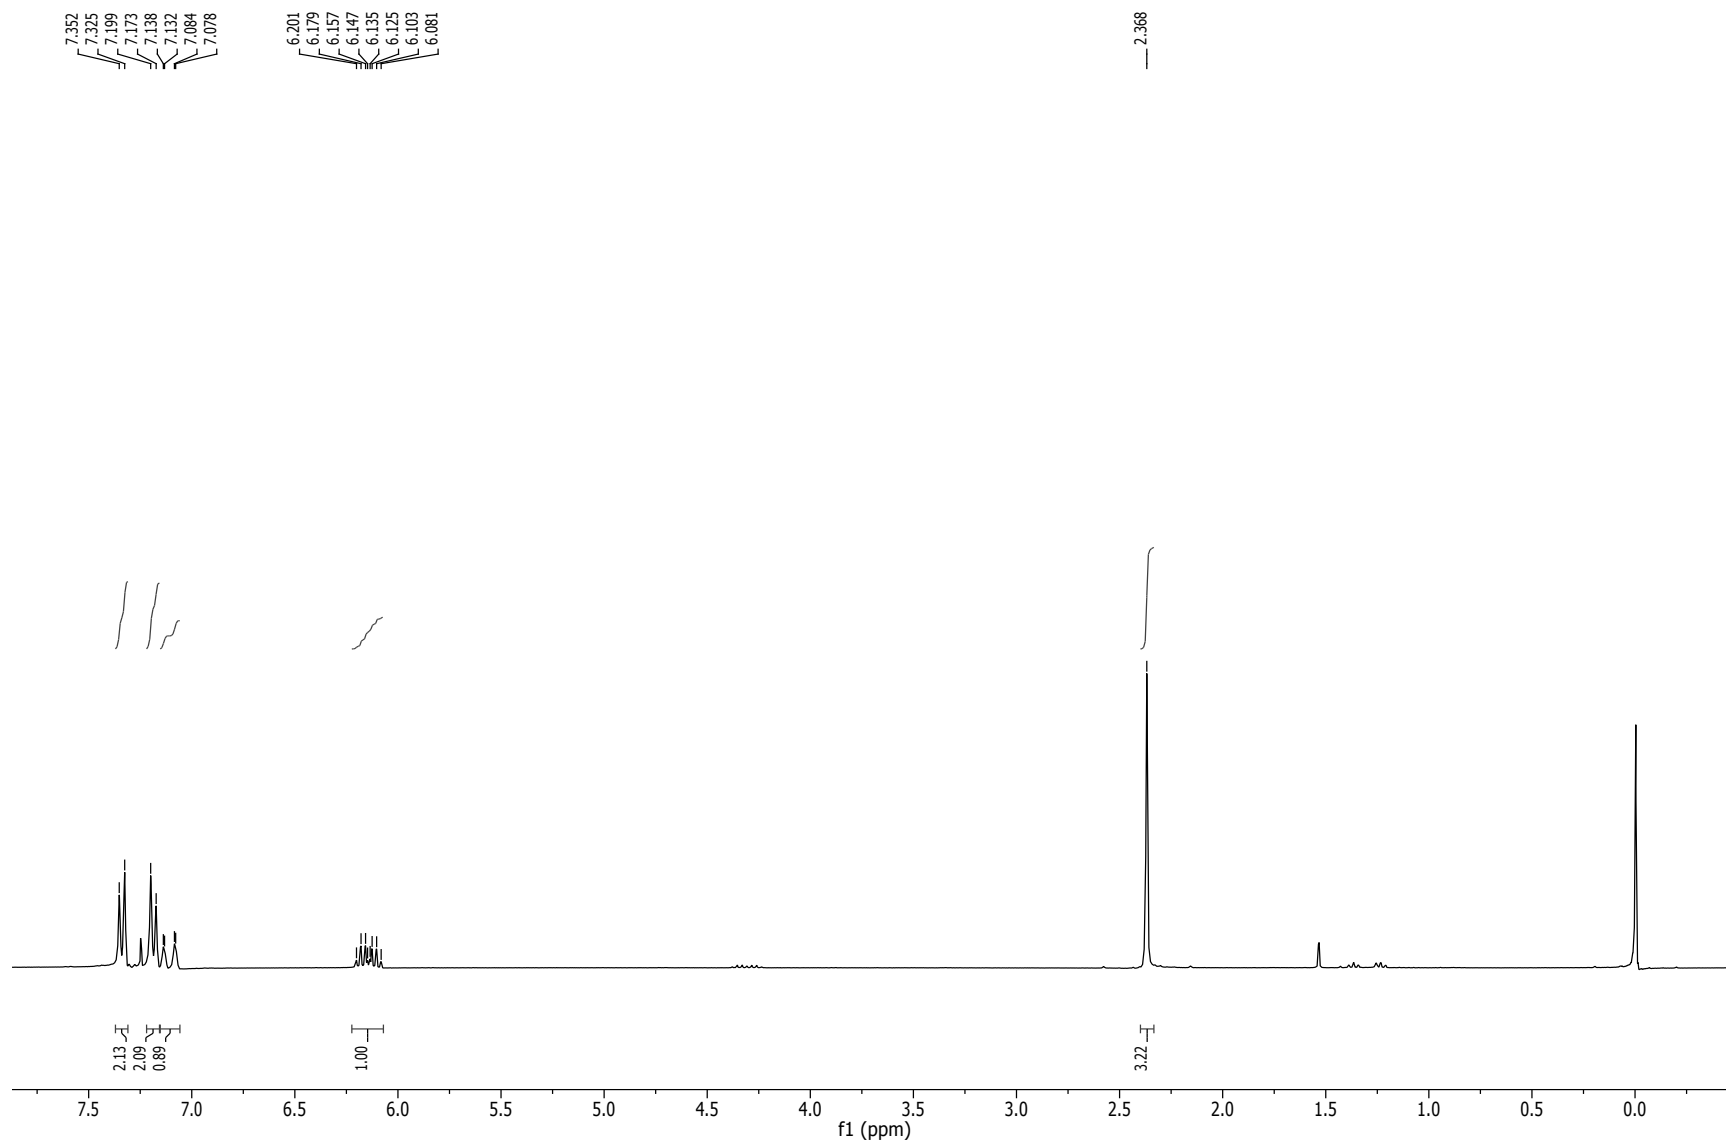

$^1\text{H}$  NMR Spectrum of (*E*)-1-methyl-4-(3,3,3-trifluoroprop-1-en-1-yl)benzene (**3b**)

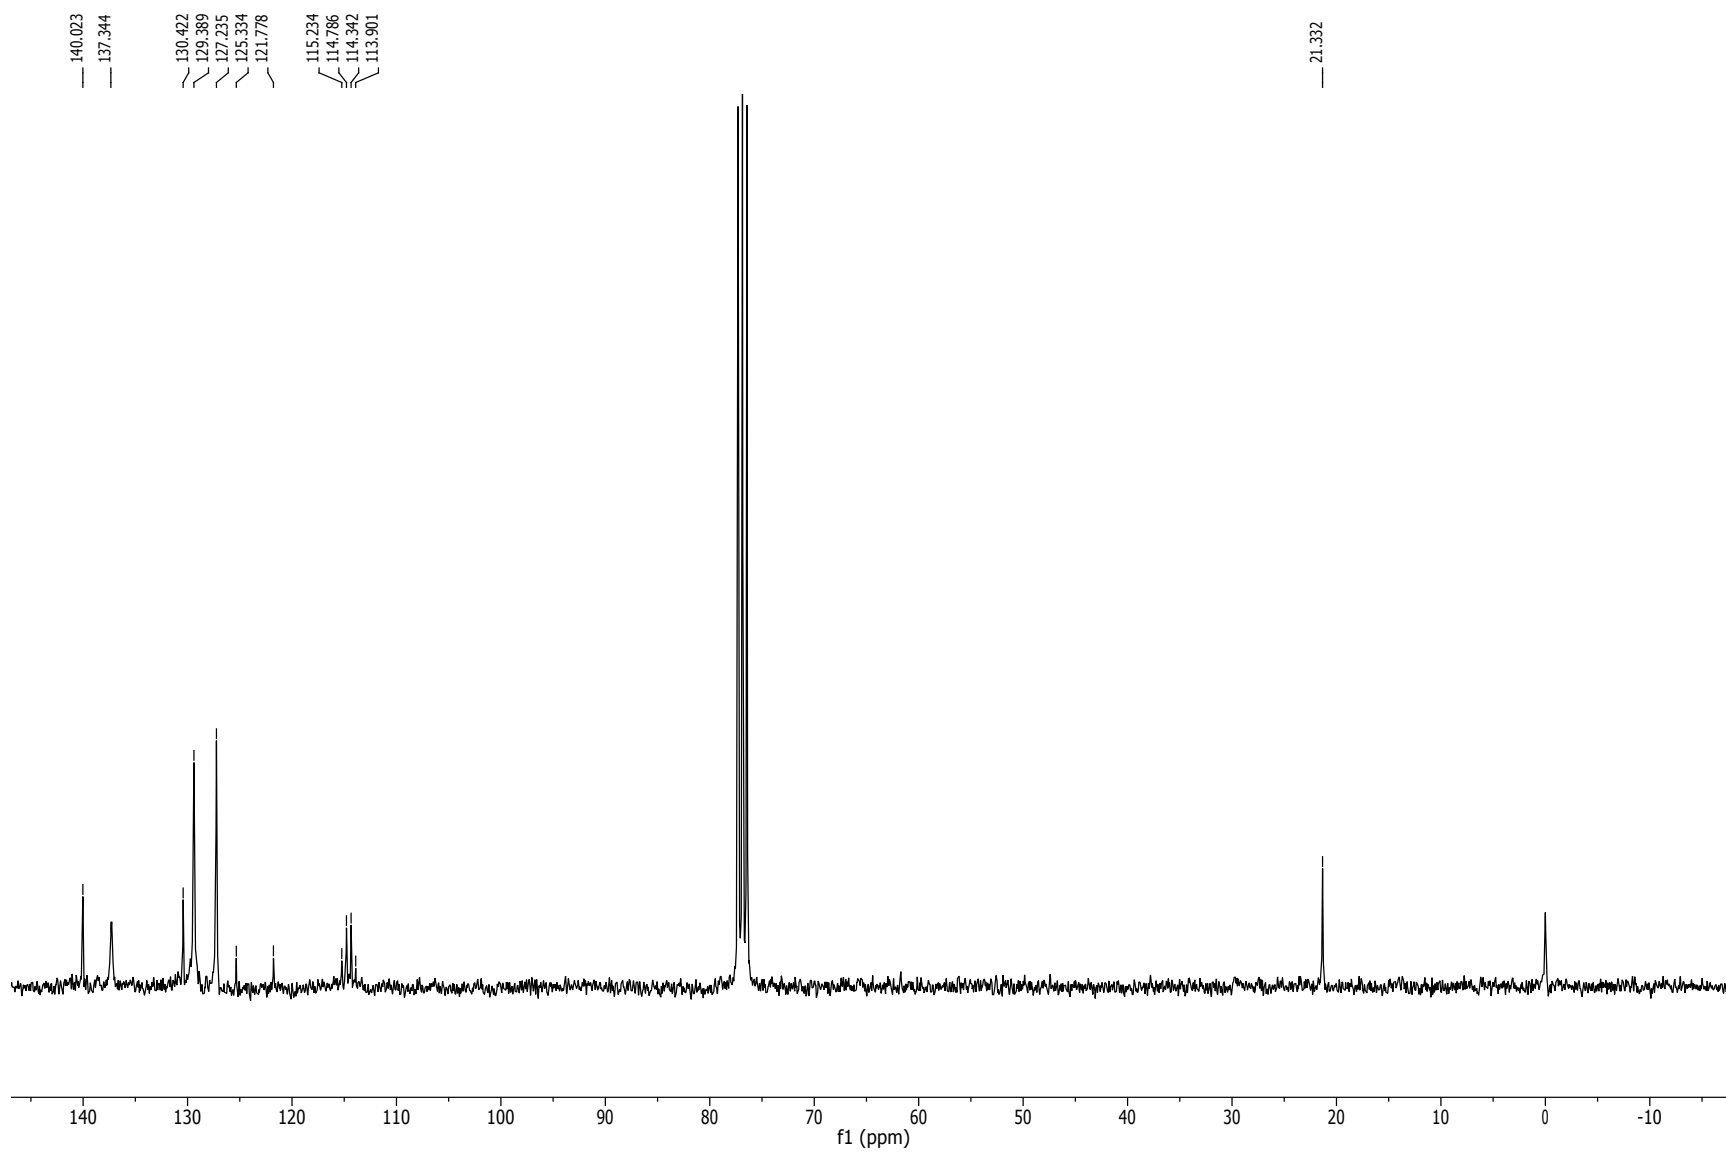

$^{13}\text{C}$  NMR Spectrum of (*E*)-1-methyl-4-(3,3,3-trifluoroprop-1-en-1-yl)benzene (**3b**)

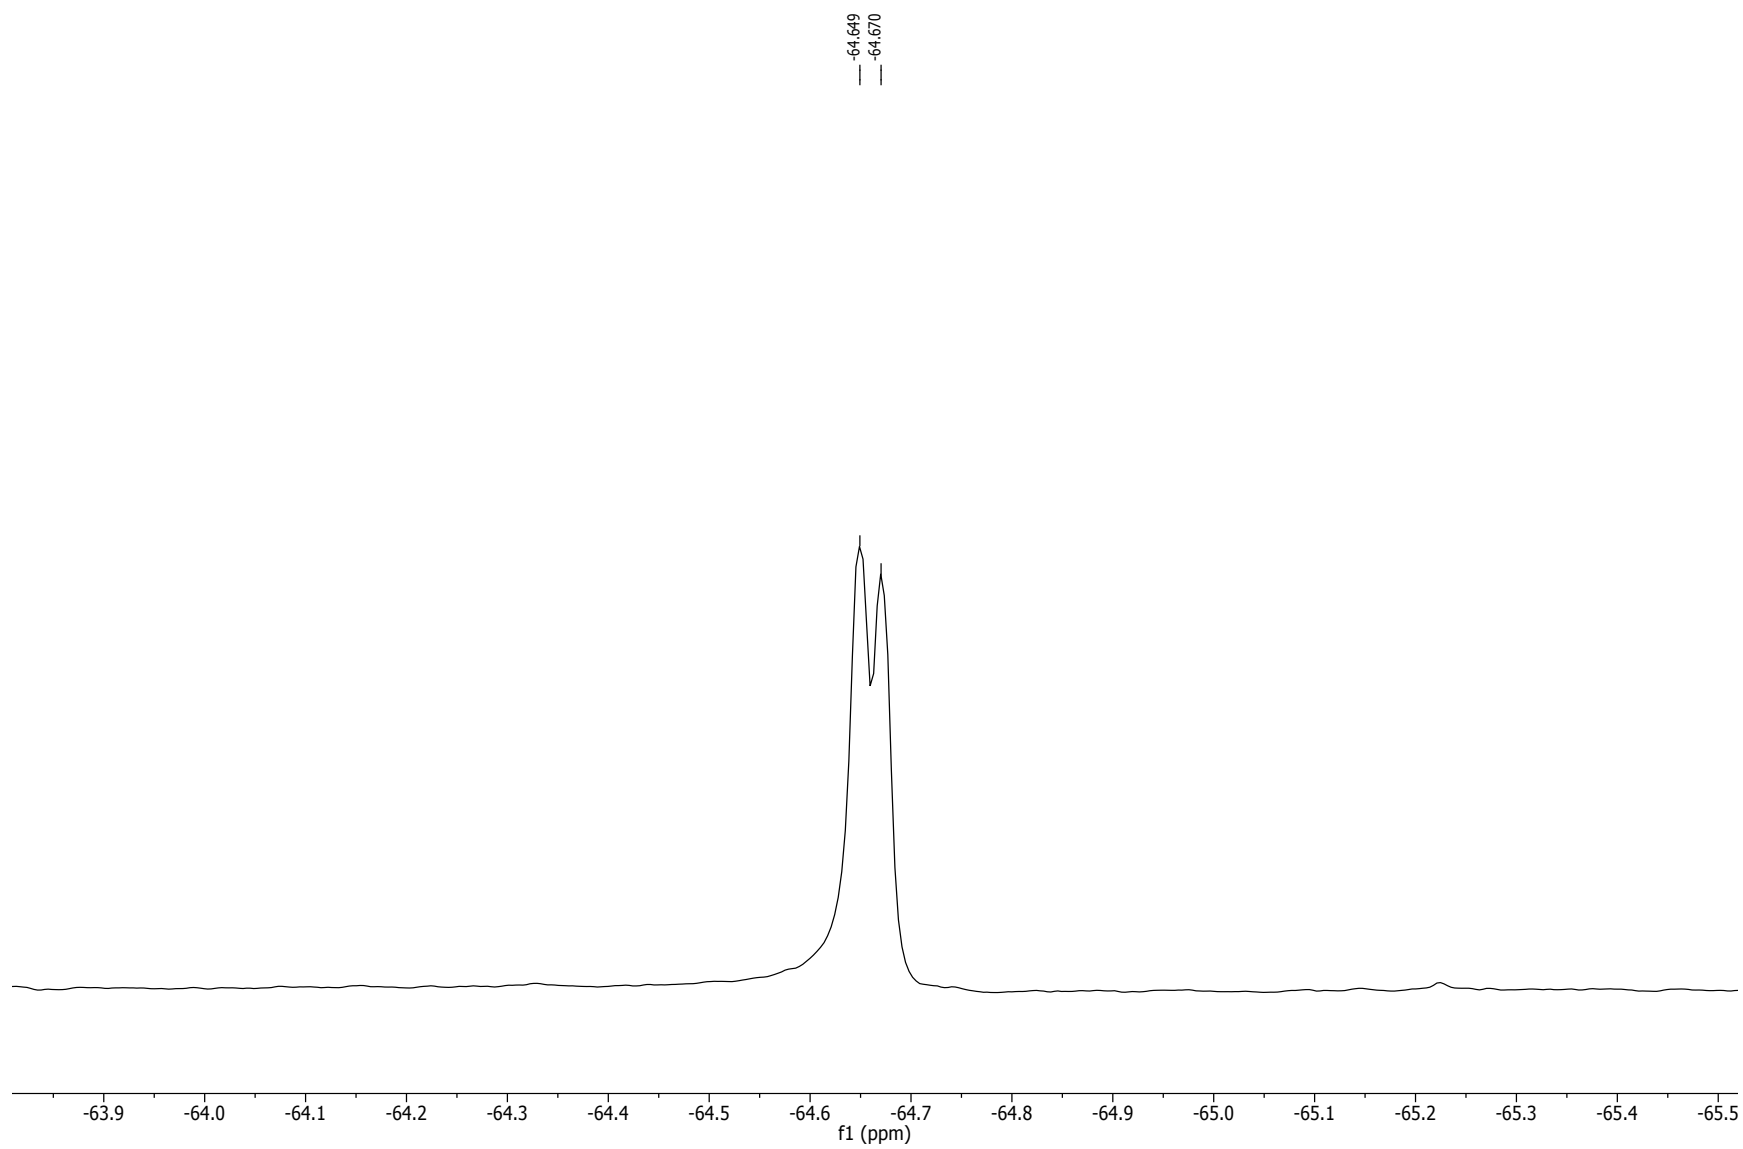

$^{19}\text{F}$  NMR Spectrum of (*E*)-1-methyl-4-(3,3,3-trifluoroprop-1-en-1-yl)benzene (**3b**)

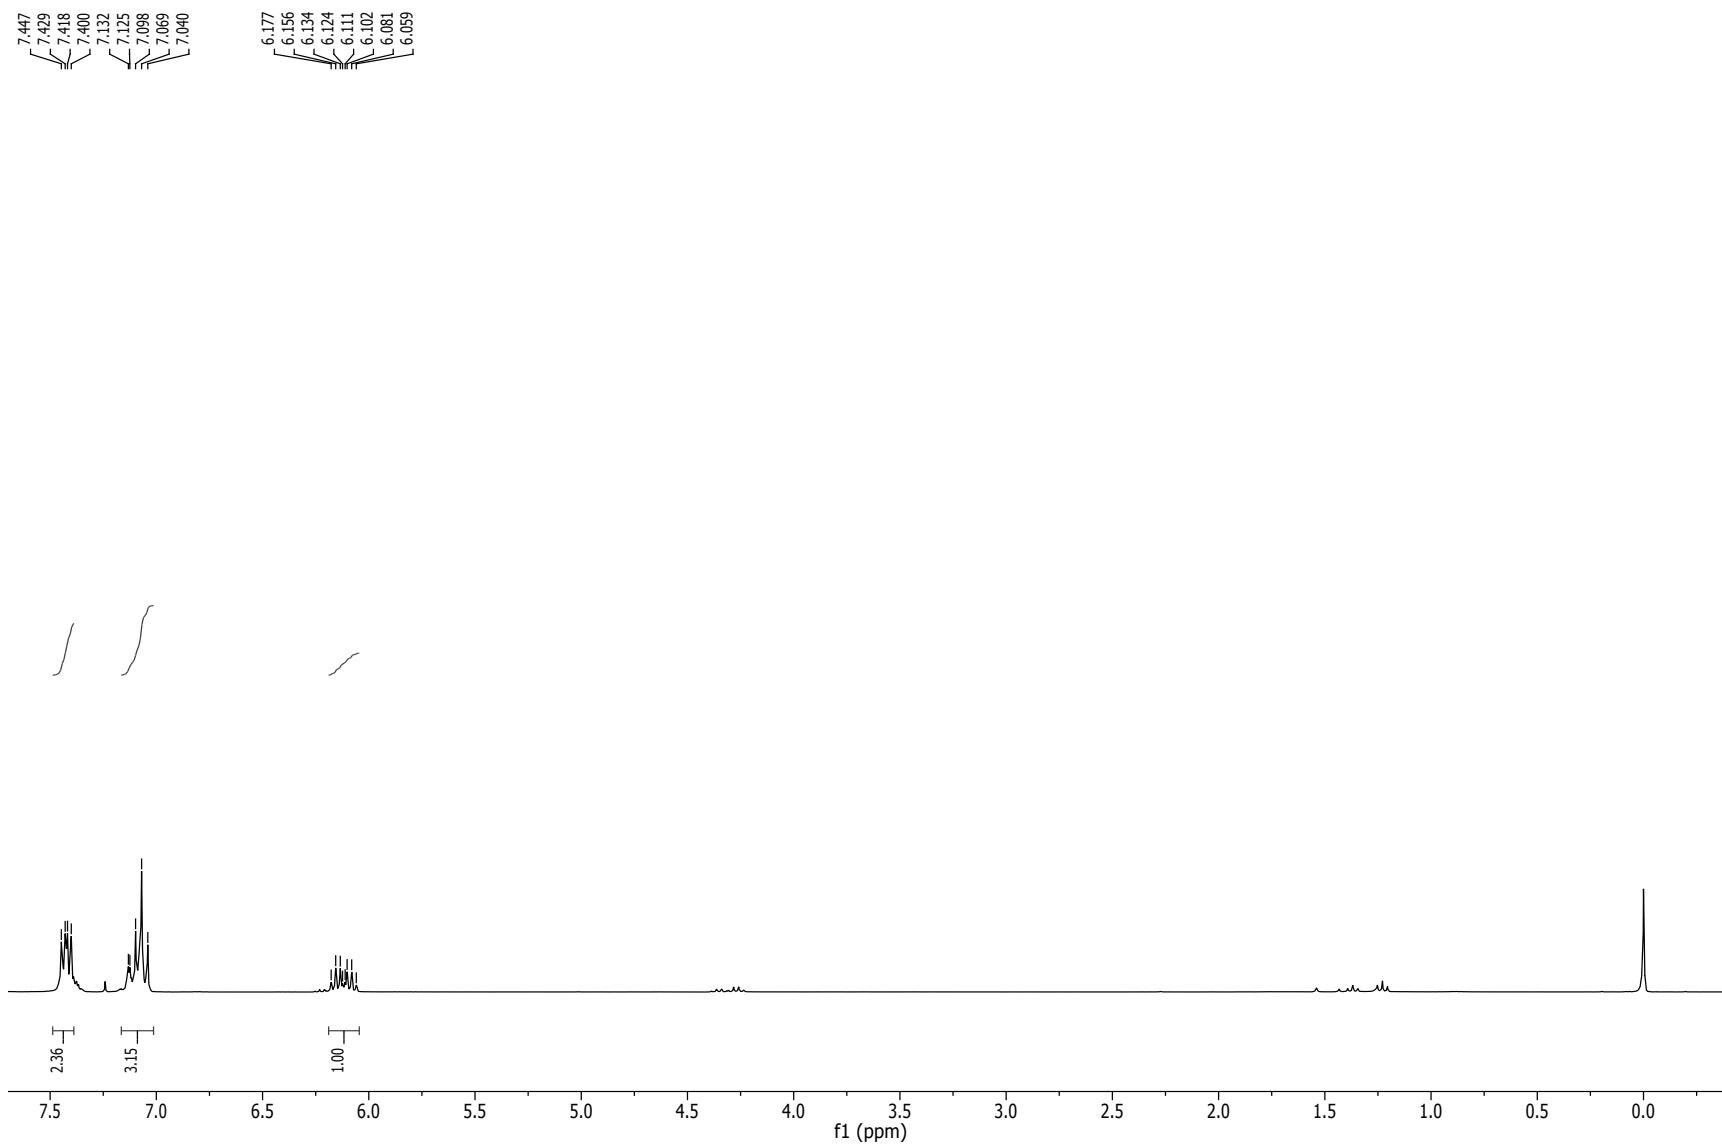

$^1\text{H}$  NMR Spectrum of (*E*)-1-fluoro-4-(3,3,3-trifluoroprop-1-en-1-yl)benzene (**3c**)

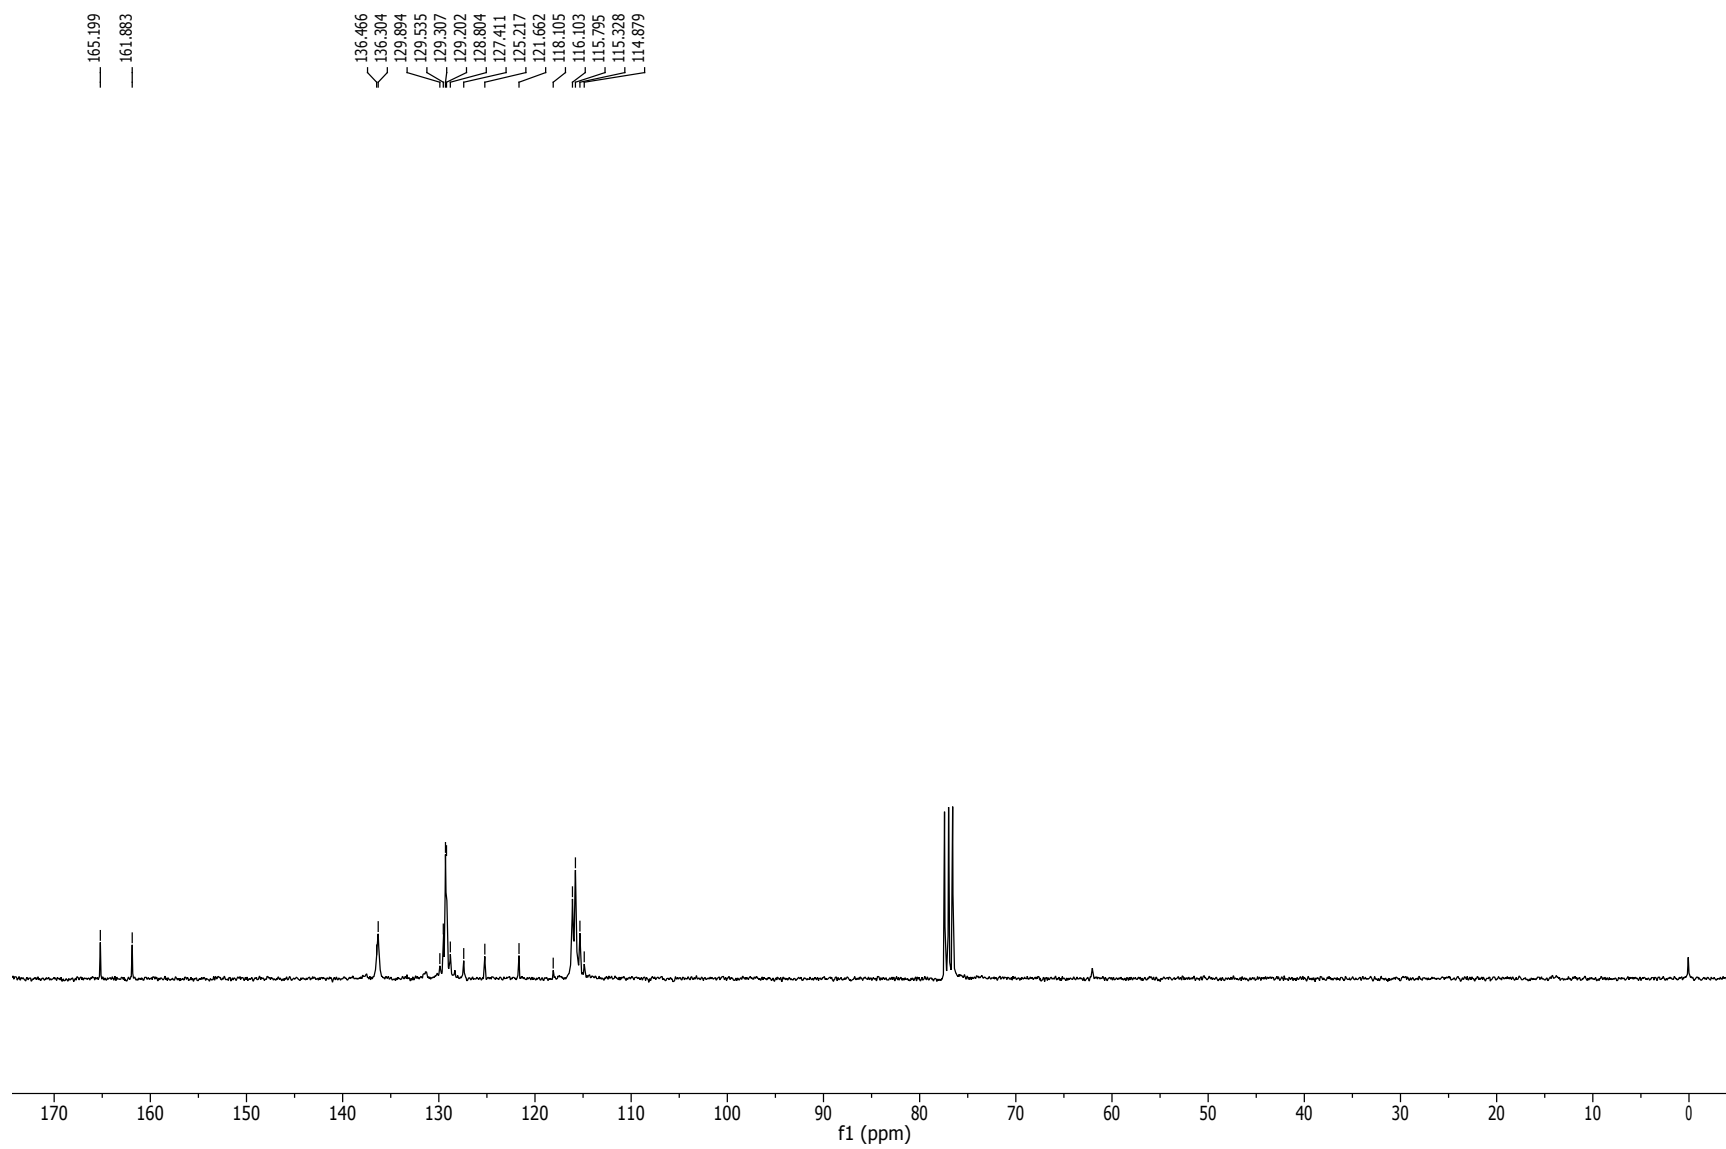

<sup>13</sup>C NMR Spectrum of (*E*)-1-fluoro-4-(3,3,3-trifluoroprop-1-en-1-yl)benzene (**3c**)

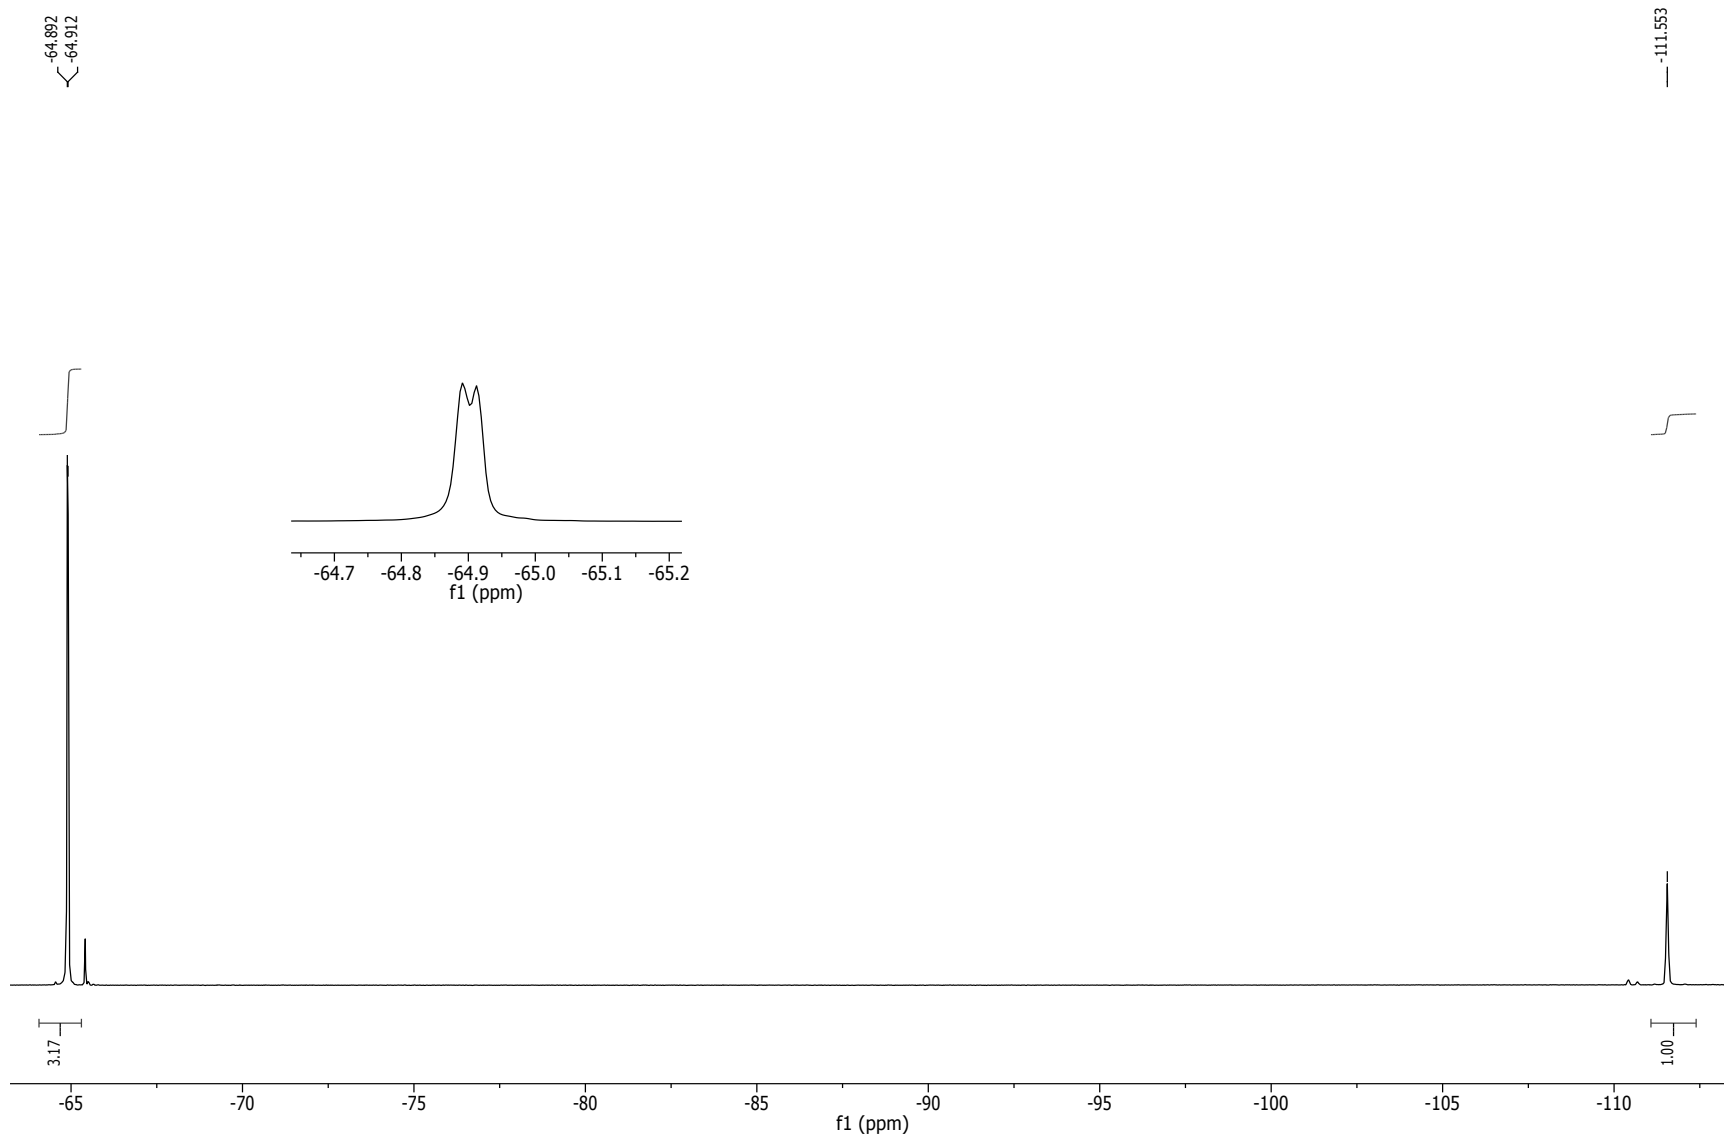

$^{19}\text{F}$  NMR Spectrum of *(E)*-1-fluoro-4-(3,3,3-trifluoroprop-1-en-1-yl)benzene (**3c**)



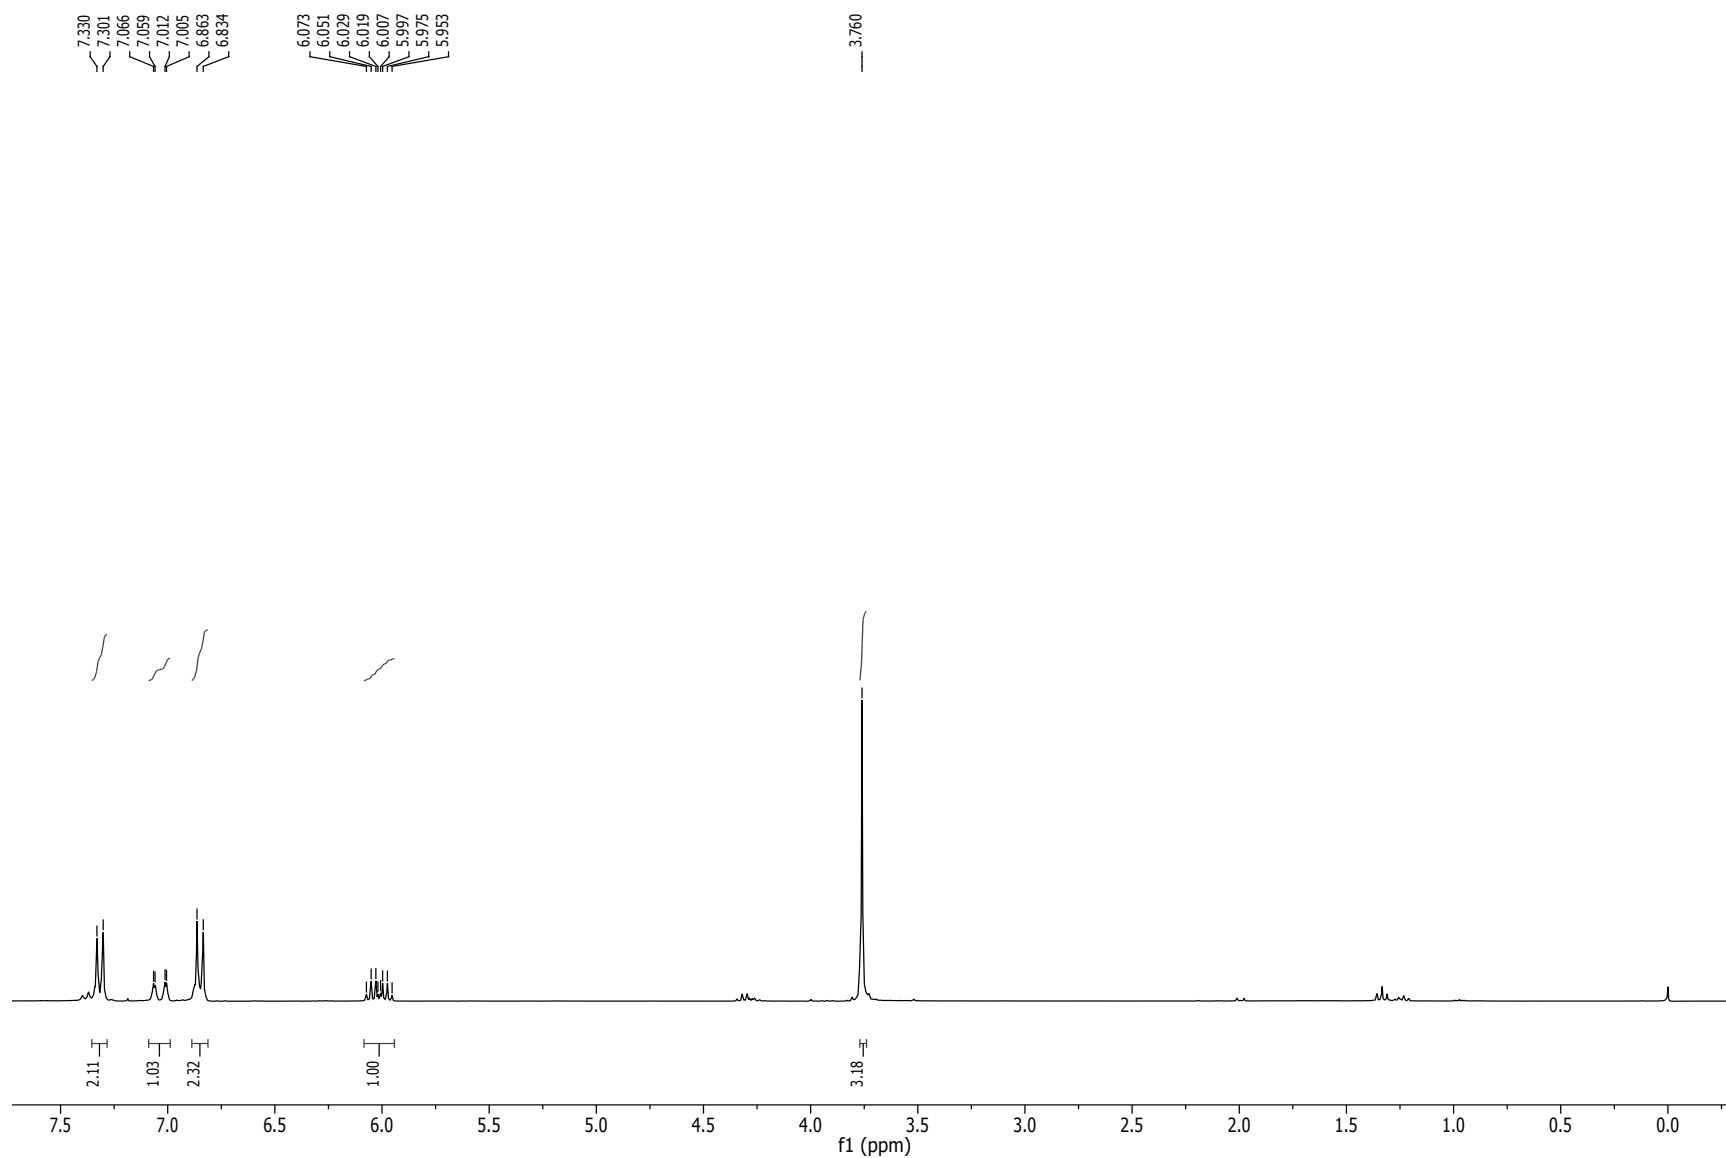

$^1\text{H}$  NMR Spectrum of (*E*)-1-methoxy-4-(3,3,3-trifluoroprop-1-en-1-yl)benzene (**3d**)

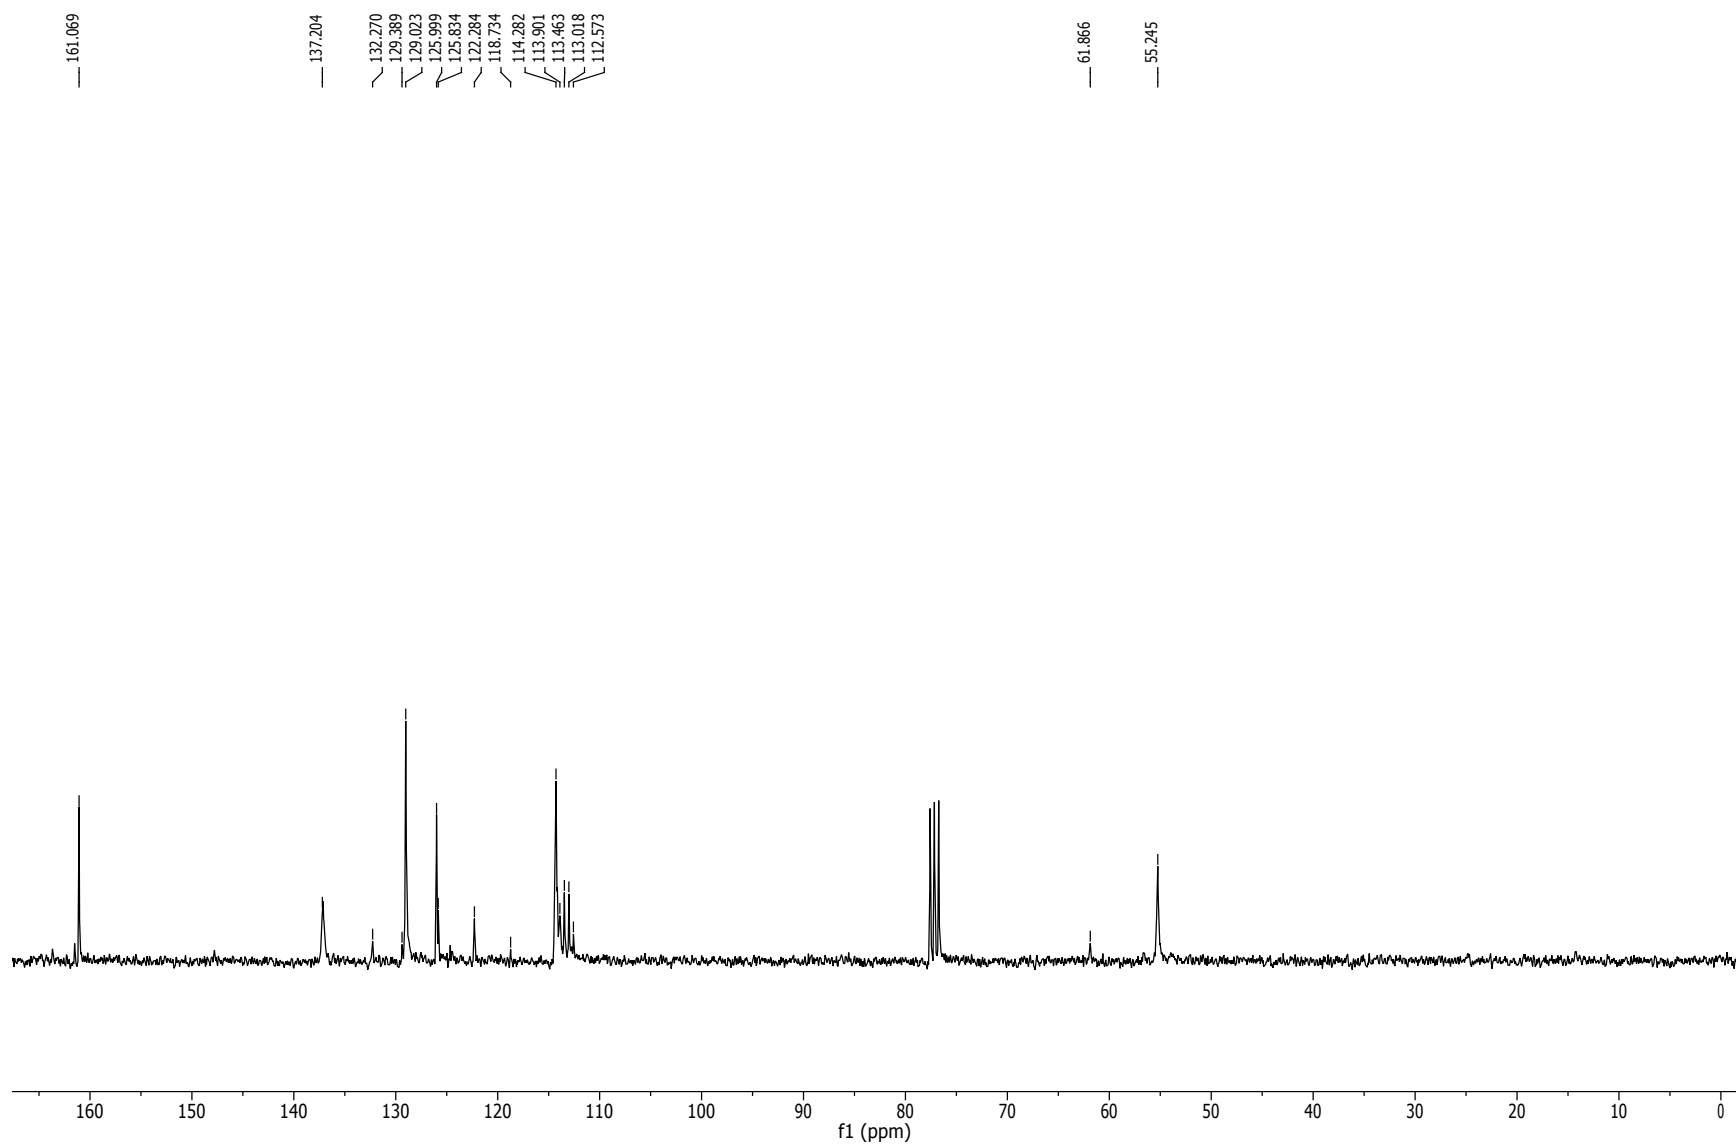

$^{13}\text{C}$  NMR Spectrum of (*E*)-1-methoxy-4-(3,3,3-trifluoroprop-1-en-1-yl)benzene (**3d**)

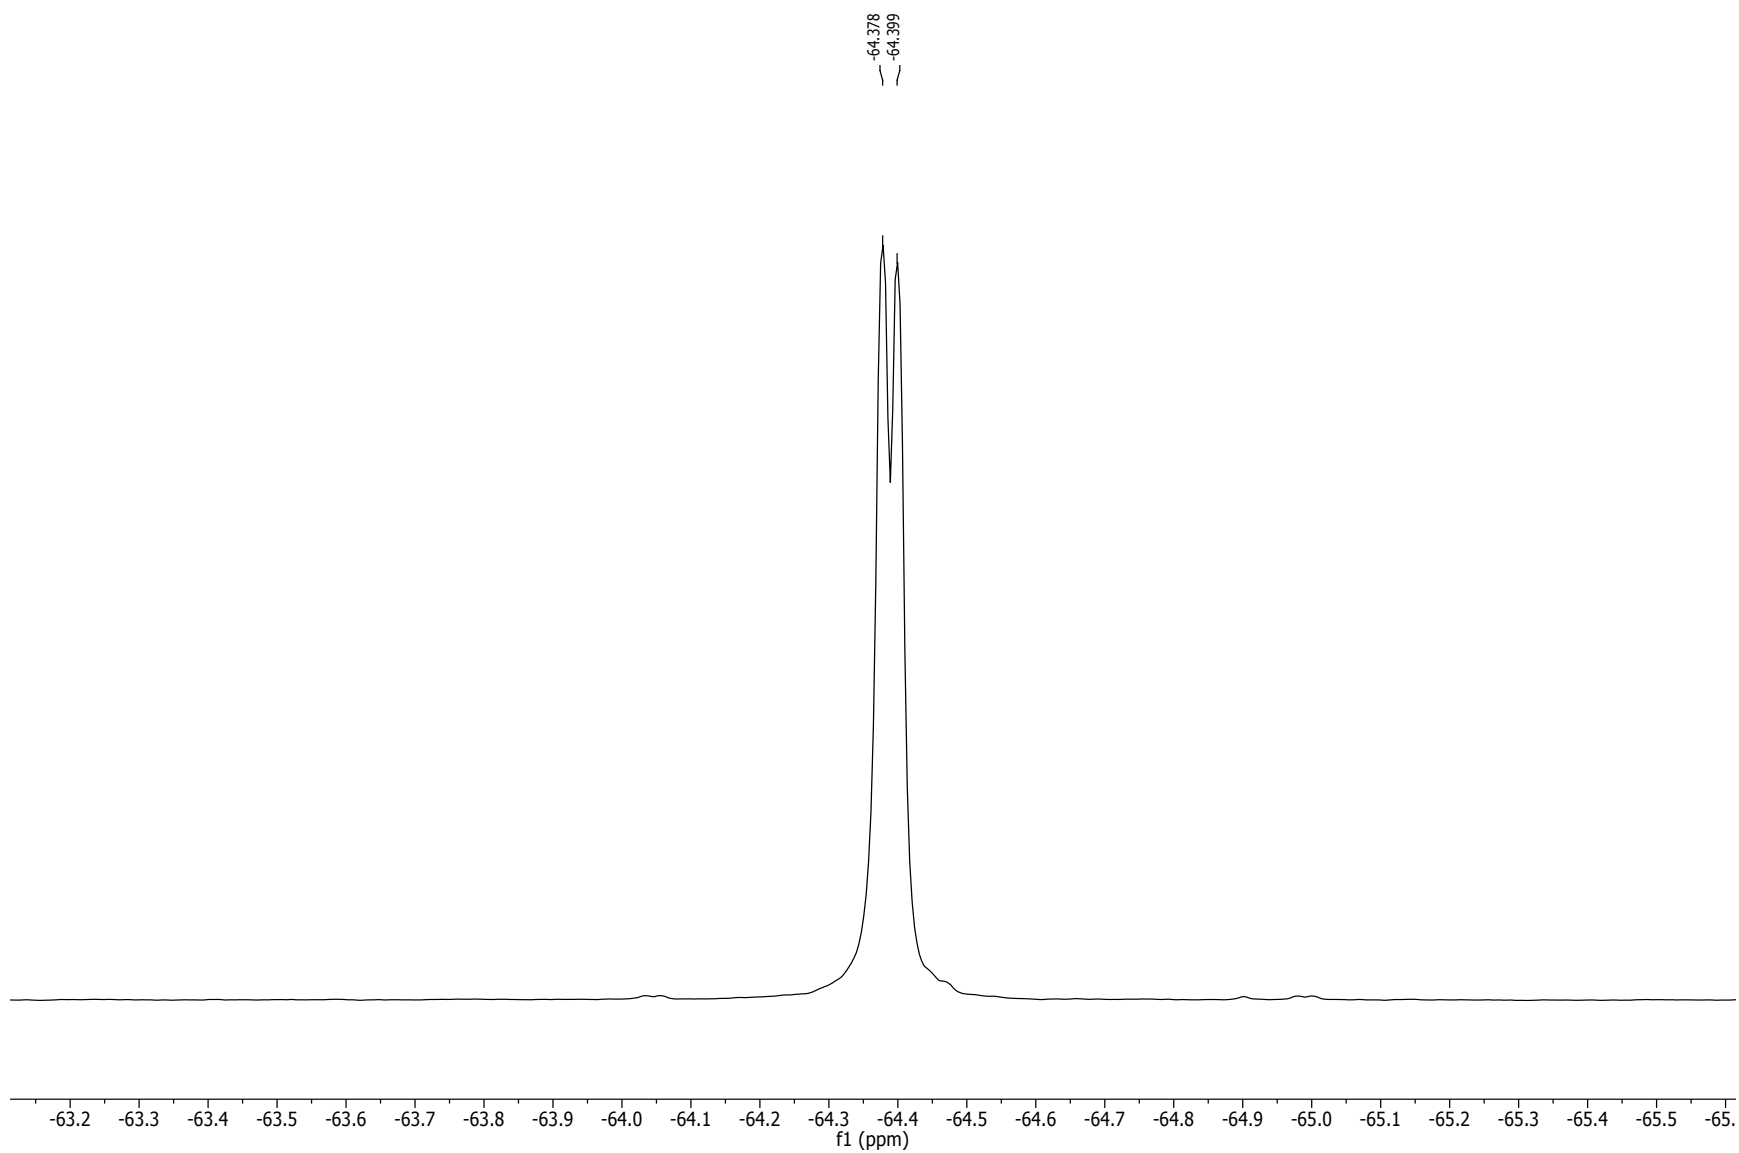

$^{19}\text{F}$  NMR Spectrum of (*E*)-1-methoxy-4-(3,3,3-trifluoroprop-1-en-1-yl)benzene (**3d**)

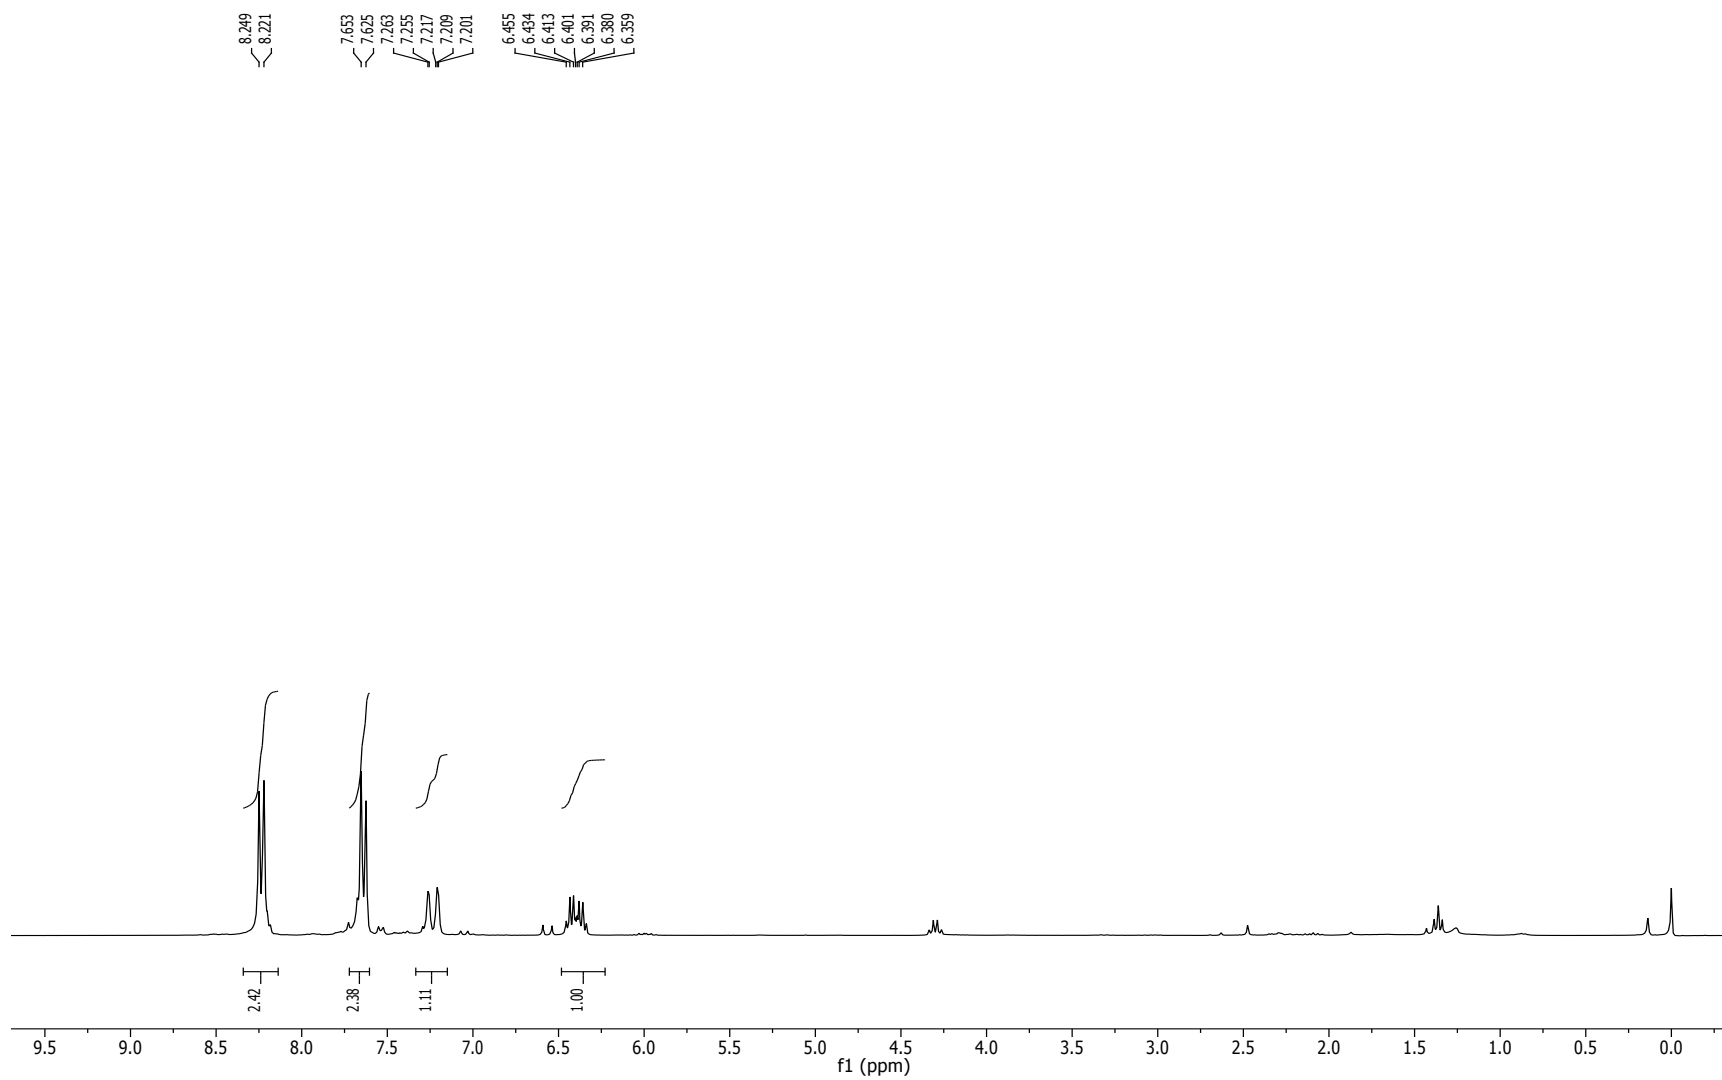

$^1\text{H}$  NMR Spectrum of (*E*)-1-nitro-4-(3,3,3-trifluoroprop-1-en-1-yl)benzene (**3e**)

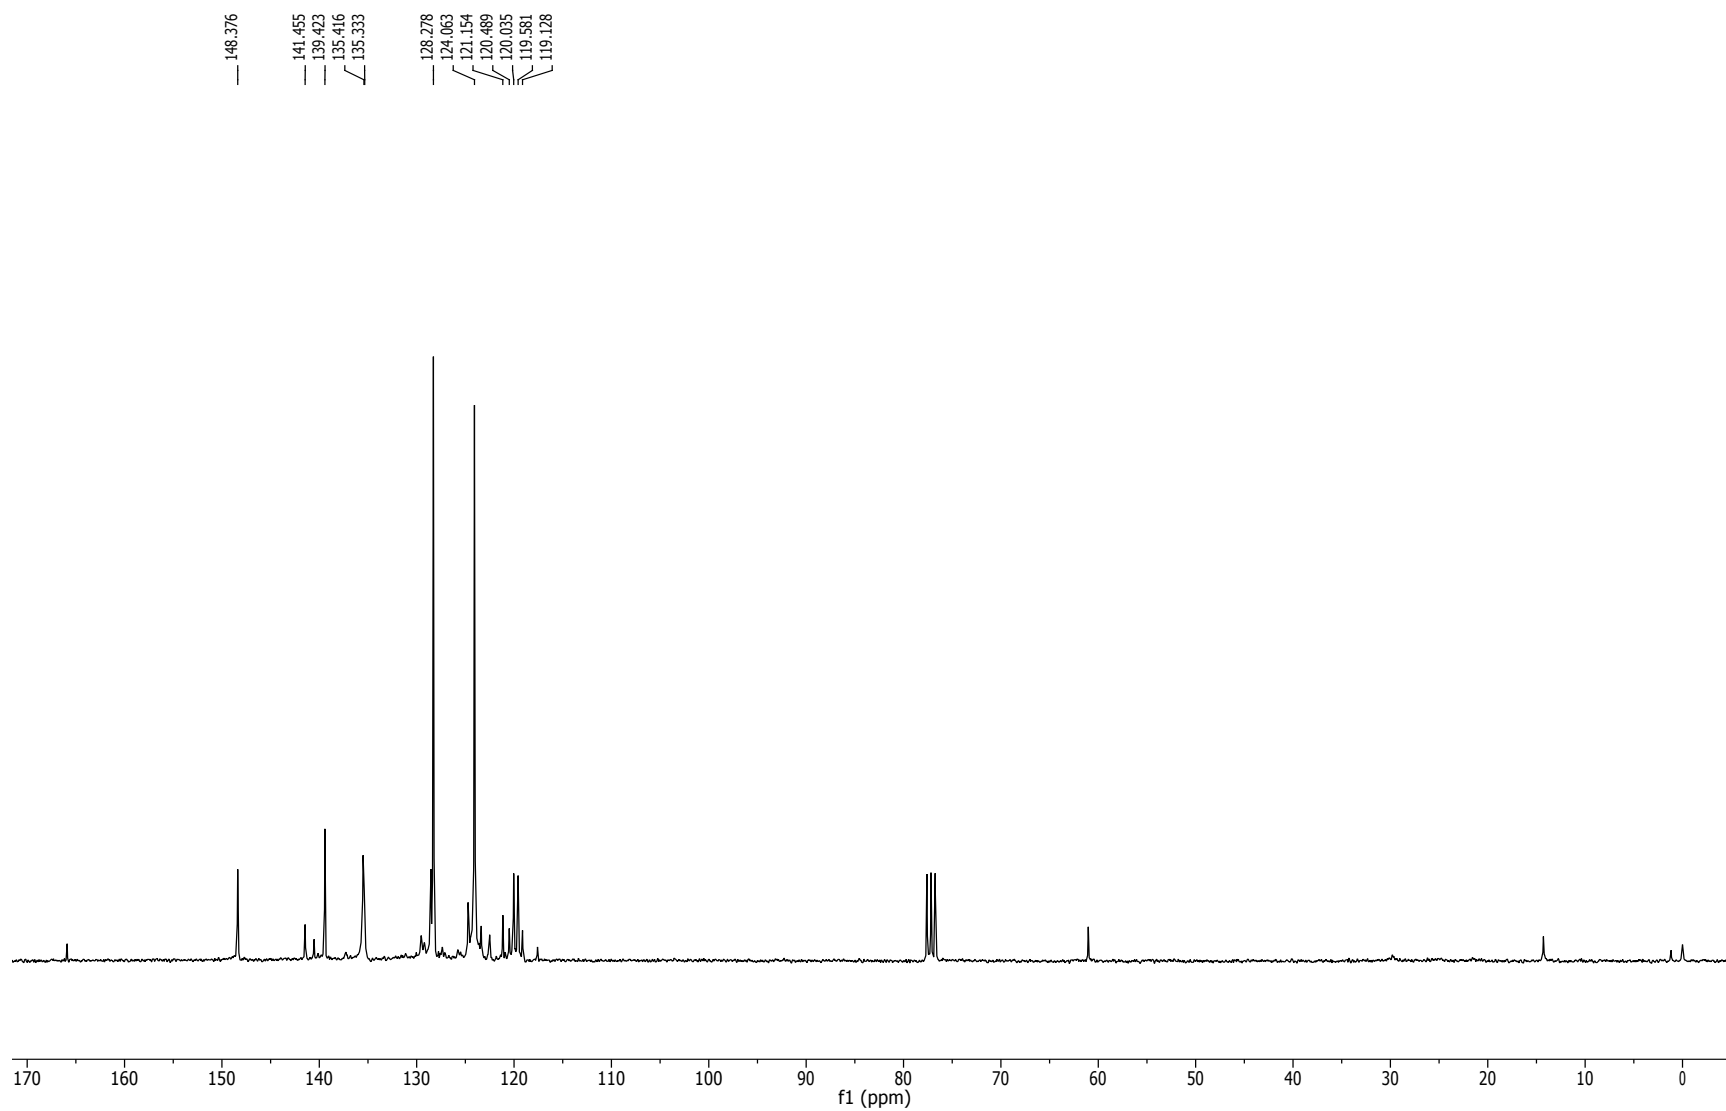

$^{13}\text{C}$  NMR Spectrum of (*E*)-1-nitro-4-(3,3,3-trifluoroprop-1-en-1-yl)benzene (3e)

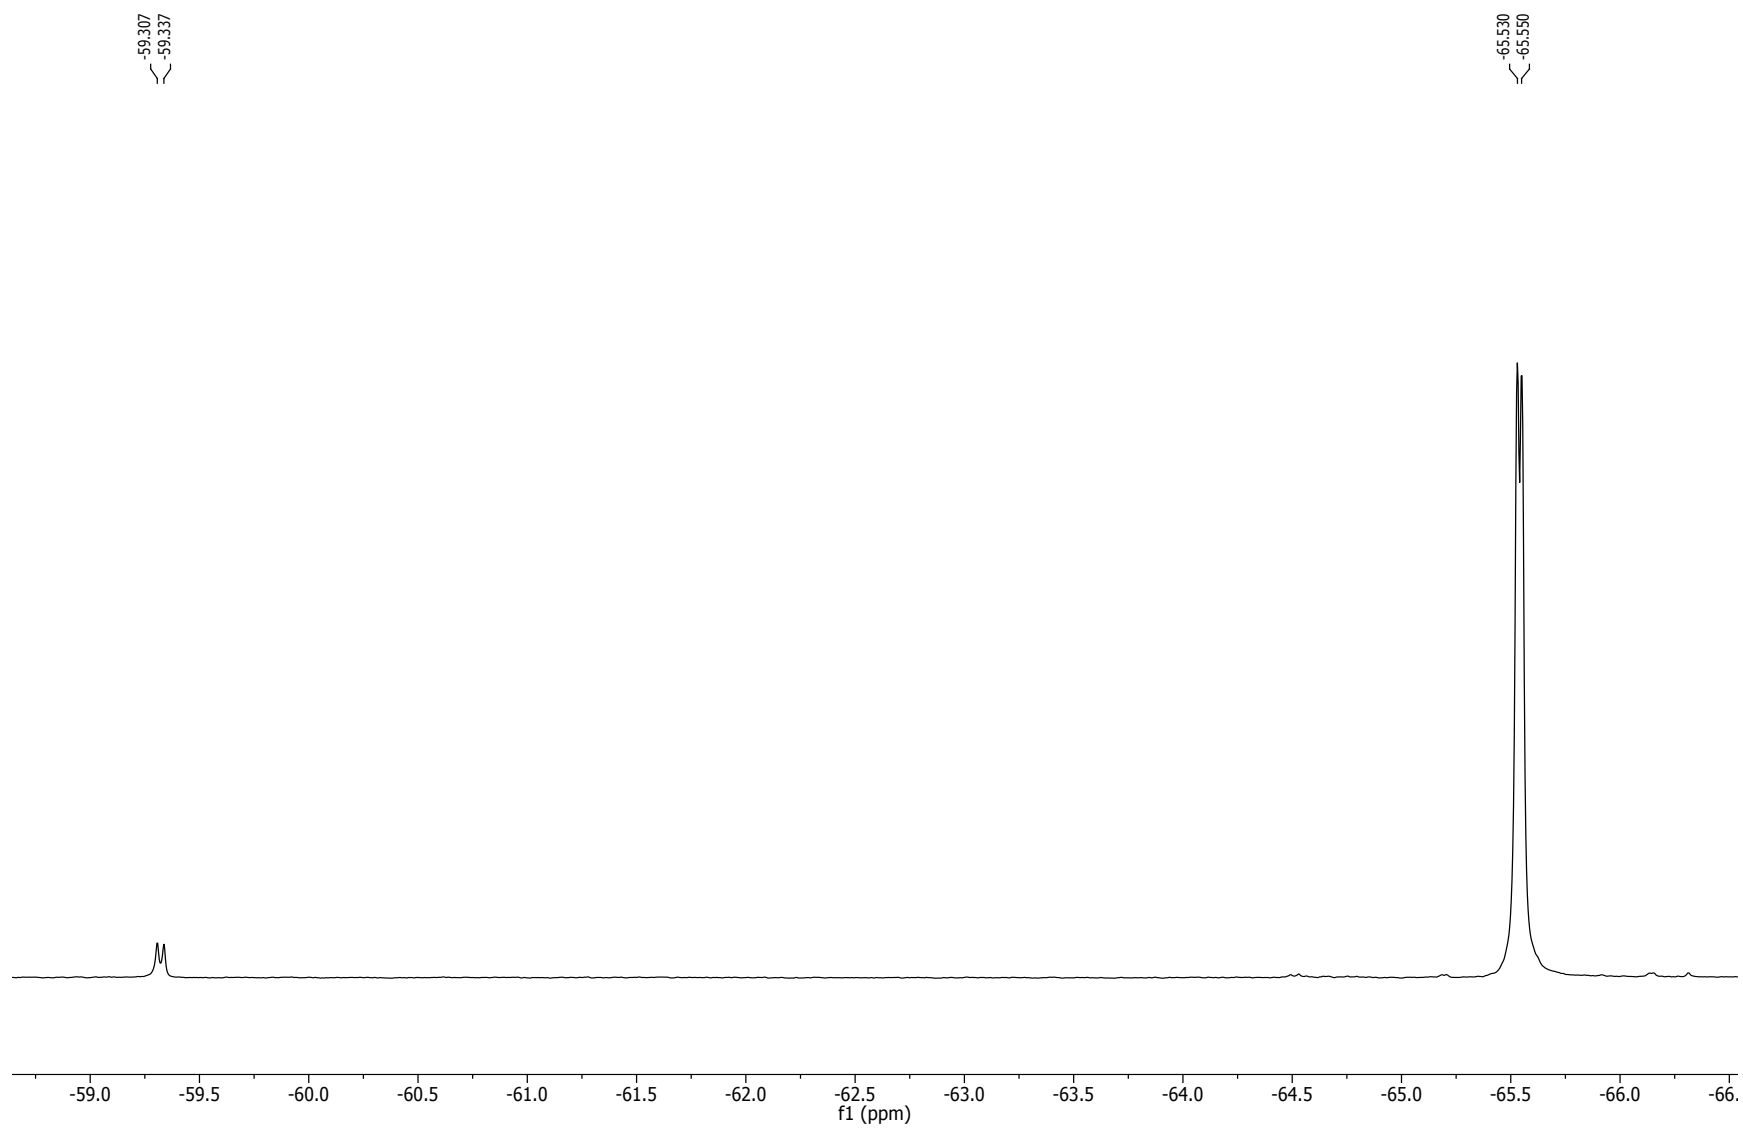

$^{19}\text{F}$  NMR Spectrum of (*E*)-1-nitro-4-(3,3,3-trifluoroprop-1-en-1-yl)benzene (**3e**)

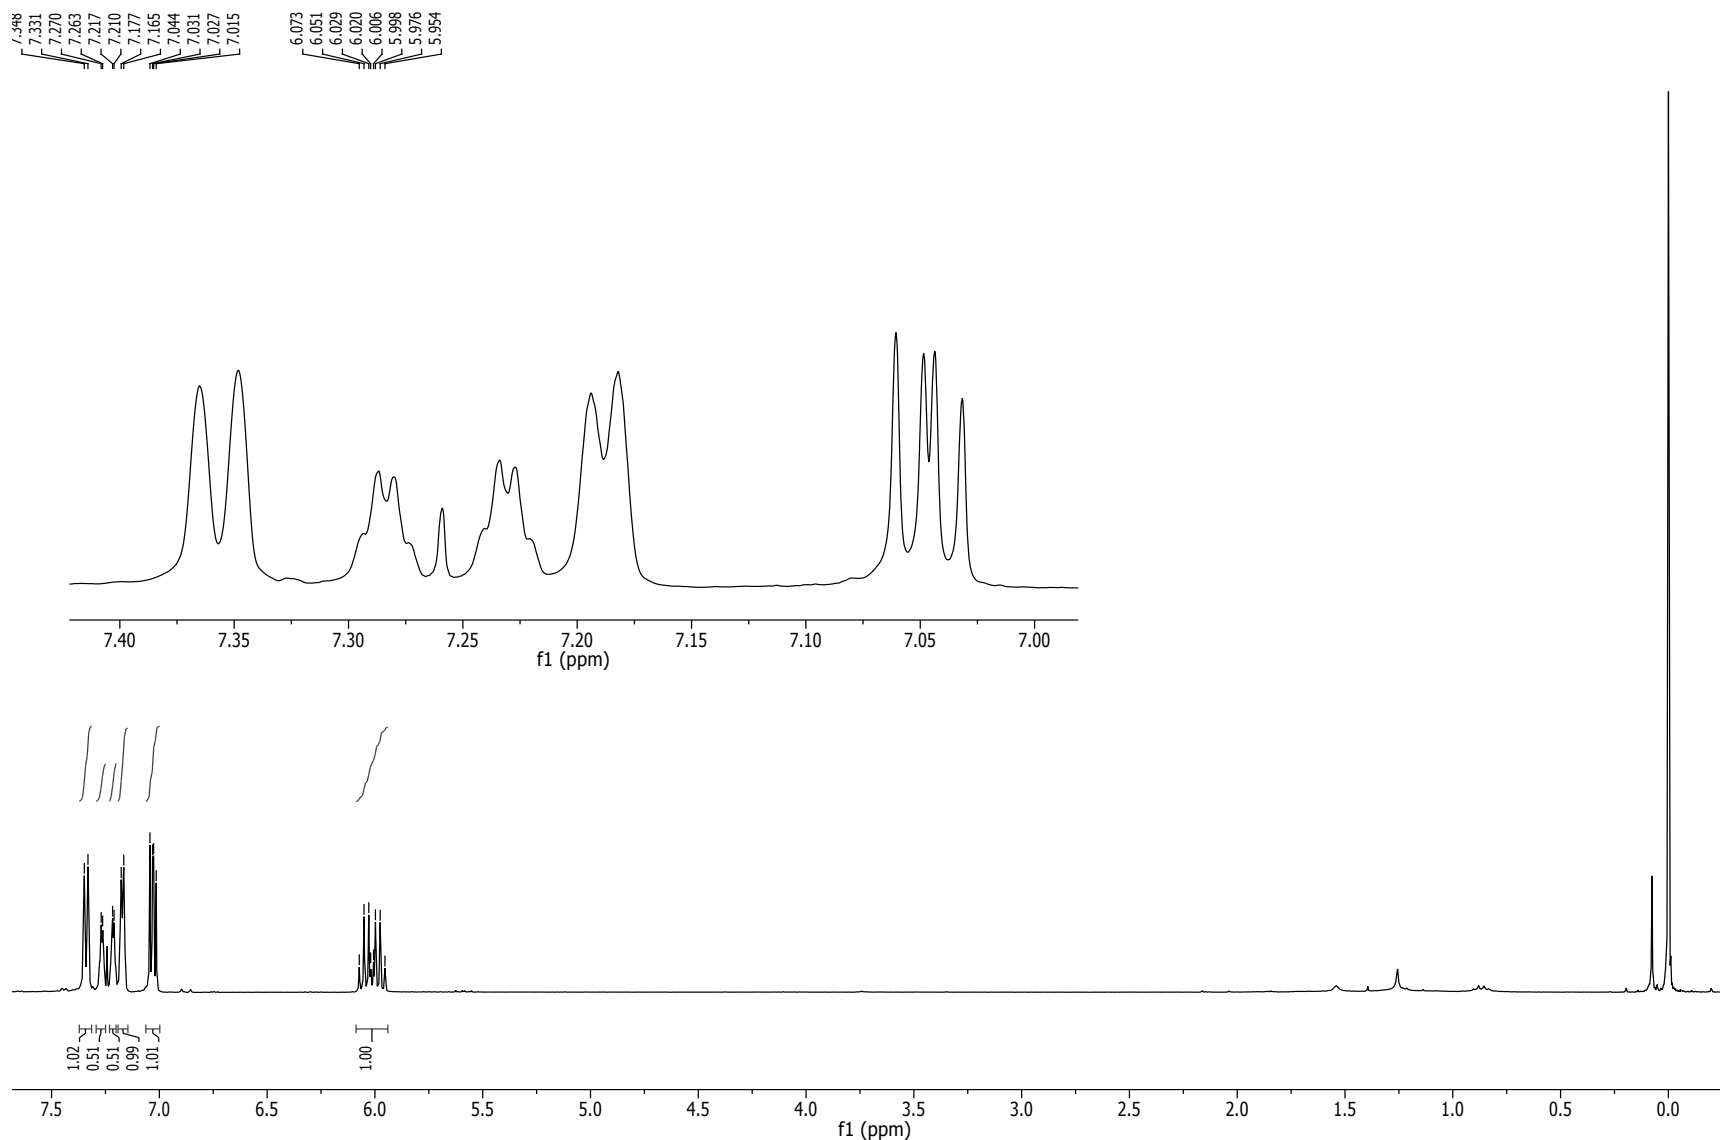

$^1\text{H}$  NMR Spectrum of *(E)*-2-(3,3,3-trifluoroprop-1-en-1-yl)thiophene (**3f**)

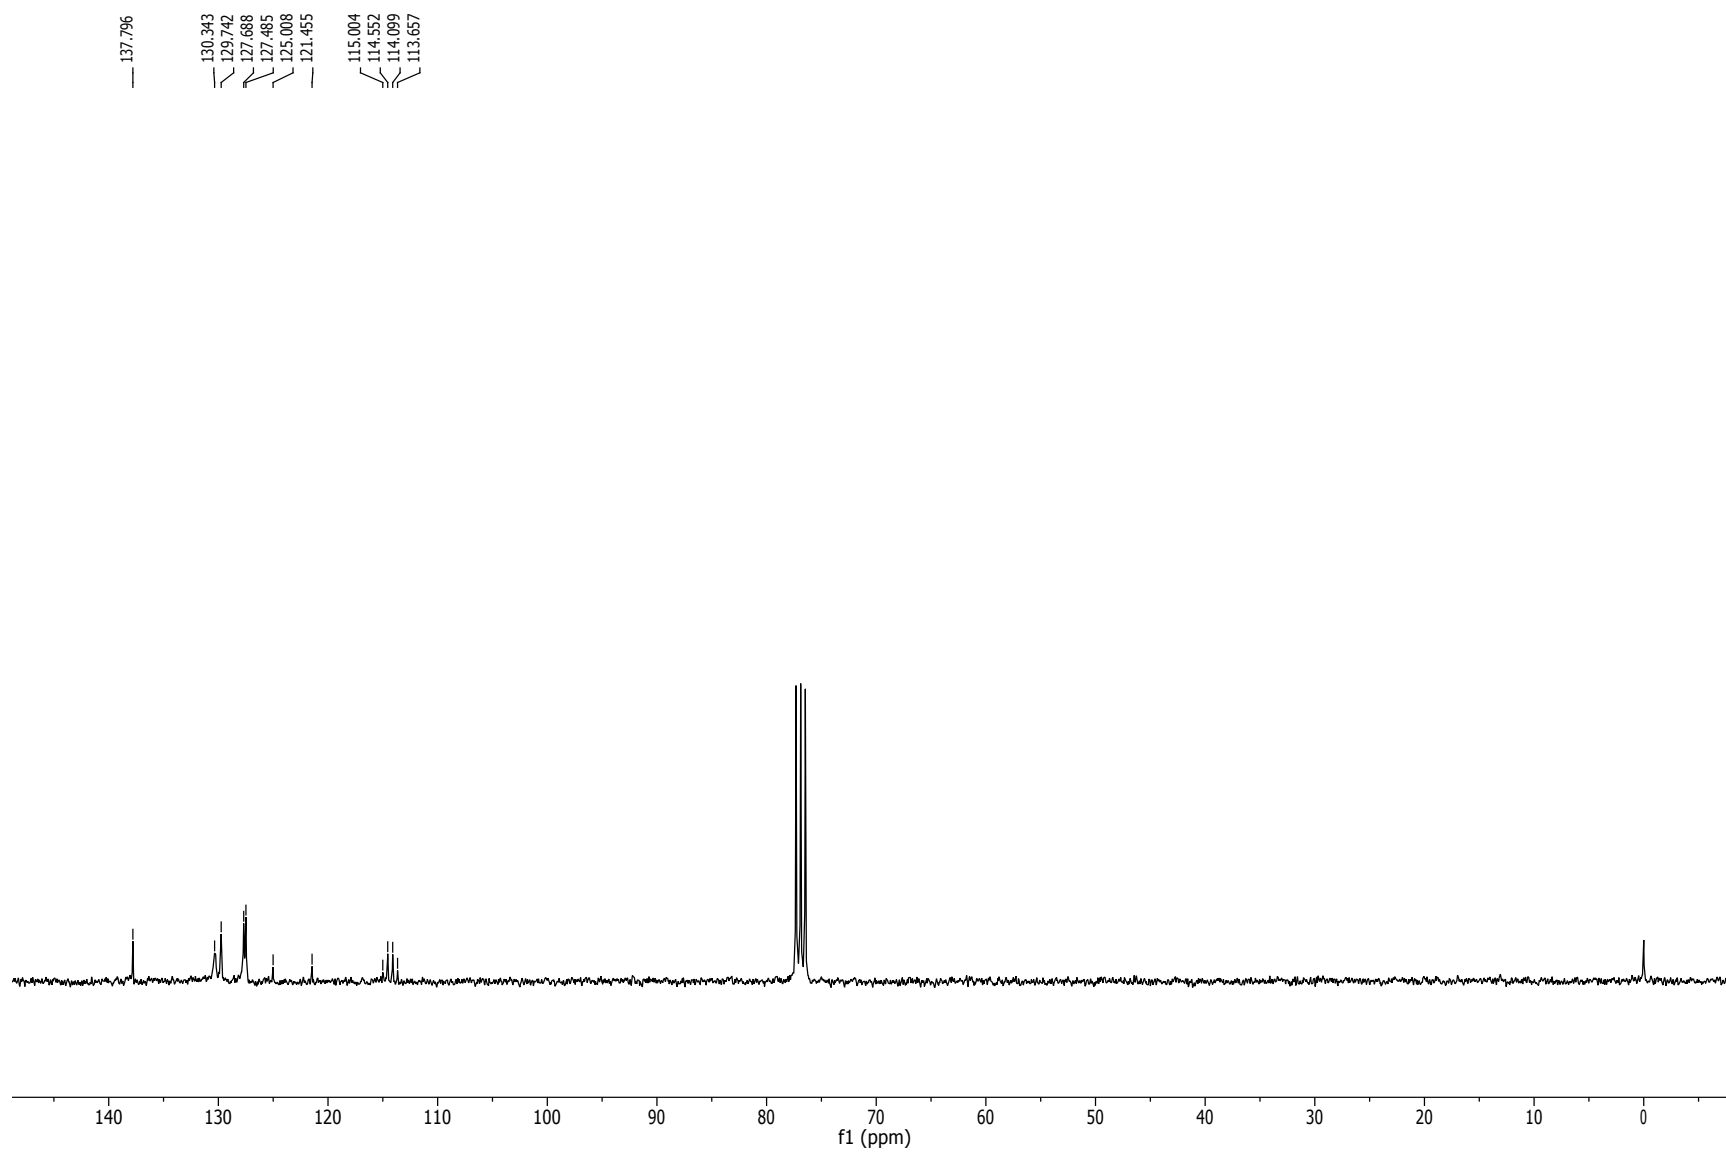

$^{13}\text{C}$  NMR Spectrum of (*E*)-2-(3,3,3-trifluoroprop-1-en-1-yl)thiophene (**3f**)



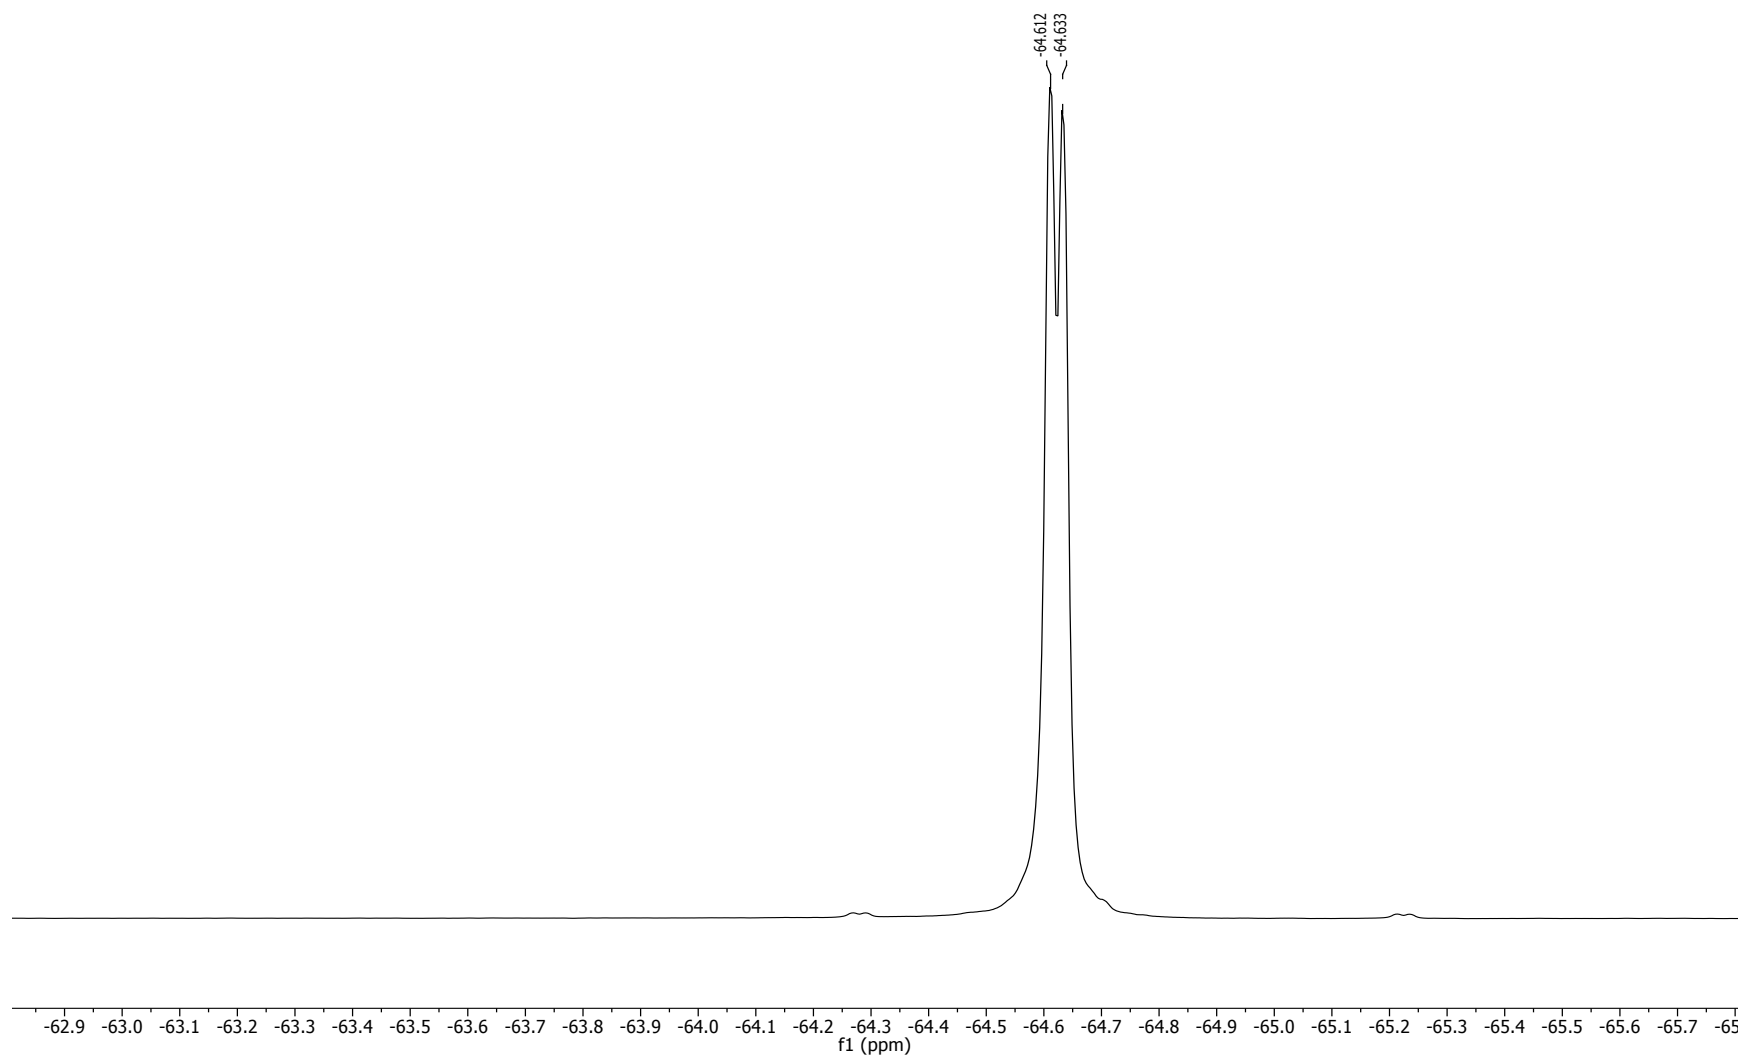

$^{19}\text{F}$  NMR Spectrum of (*E*)-2-(3,3,3-trifluoroprop-1-en-1-yl)thiophene (**3f**)

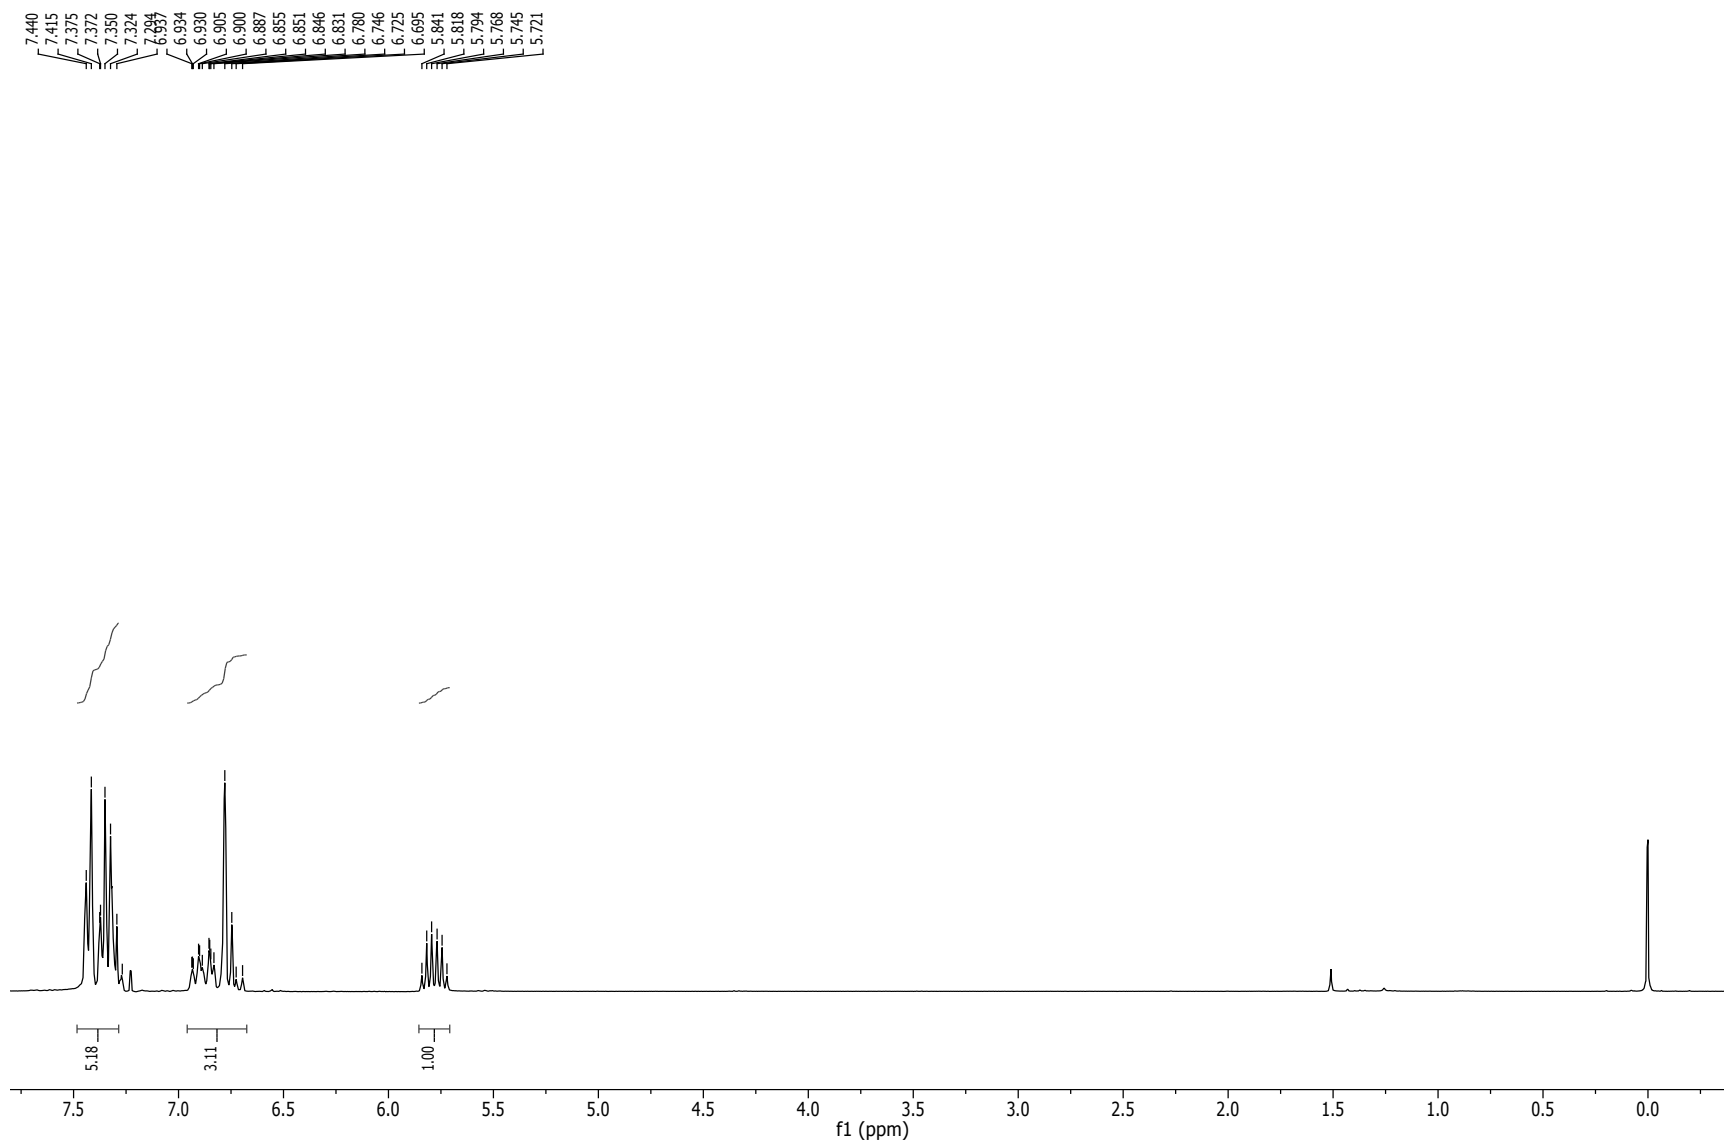

<sup>1</sup>H NMR Spectrum of ((1*E*,3*E*)-5,5,5-trifluoropenta-1,3-dien-1-yl)benzene (**3g**)

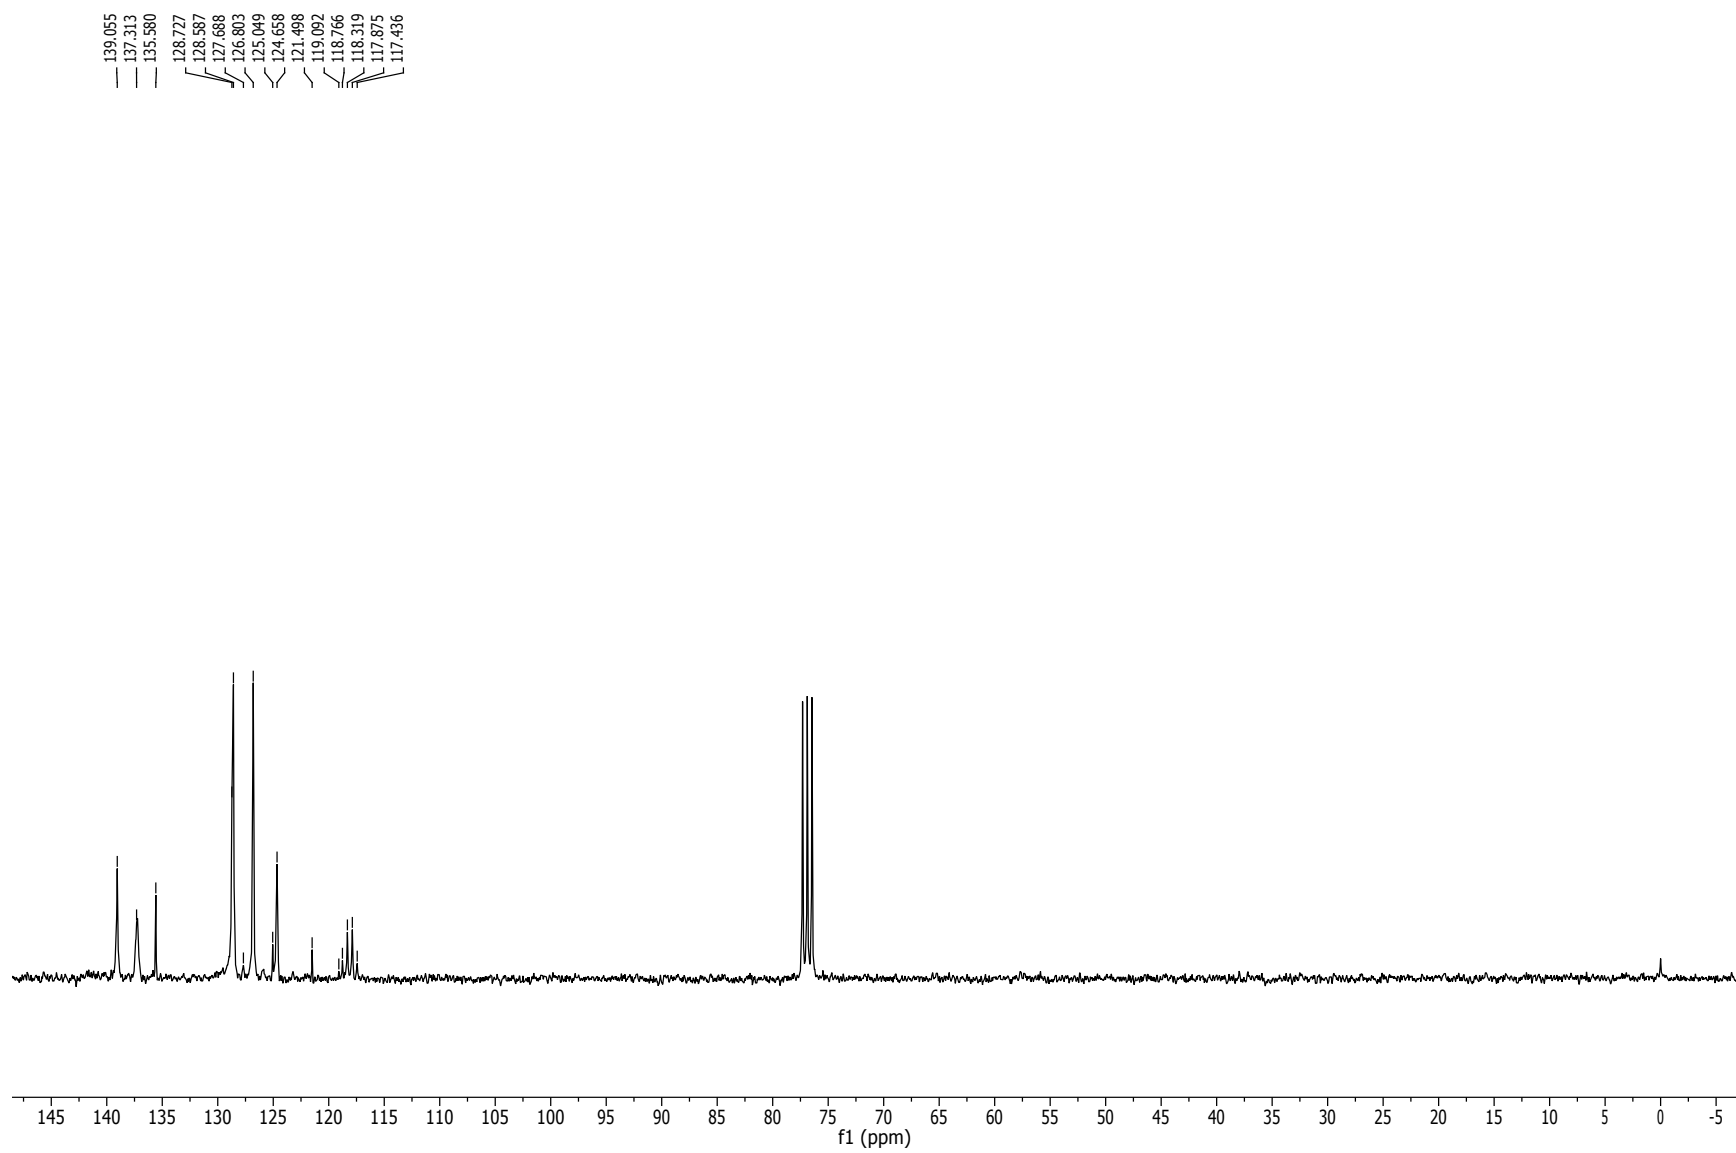

$^{13}\text{C}$  NMR Spectrum of ((1*E*,3*E*)-5,5,5-trifluoropenta-1,3-dien-1-yl)benzene (**3g**)

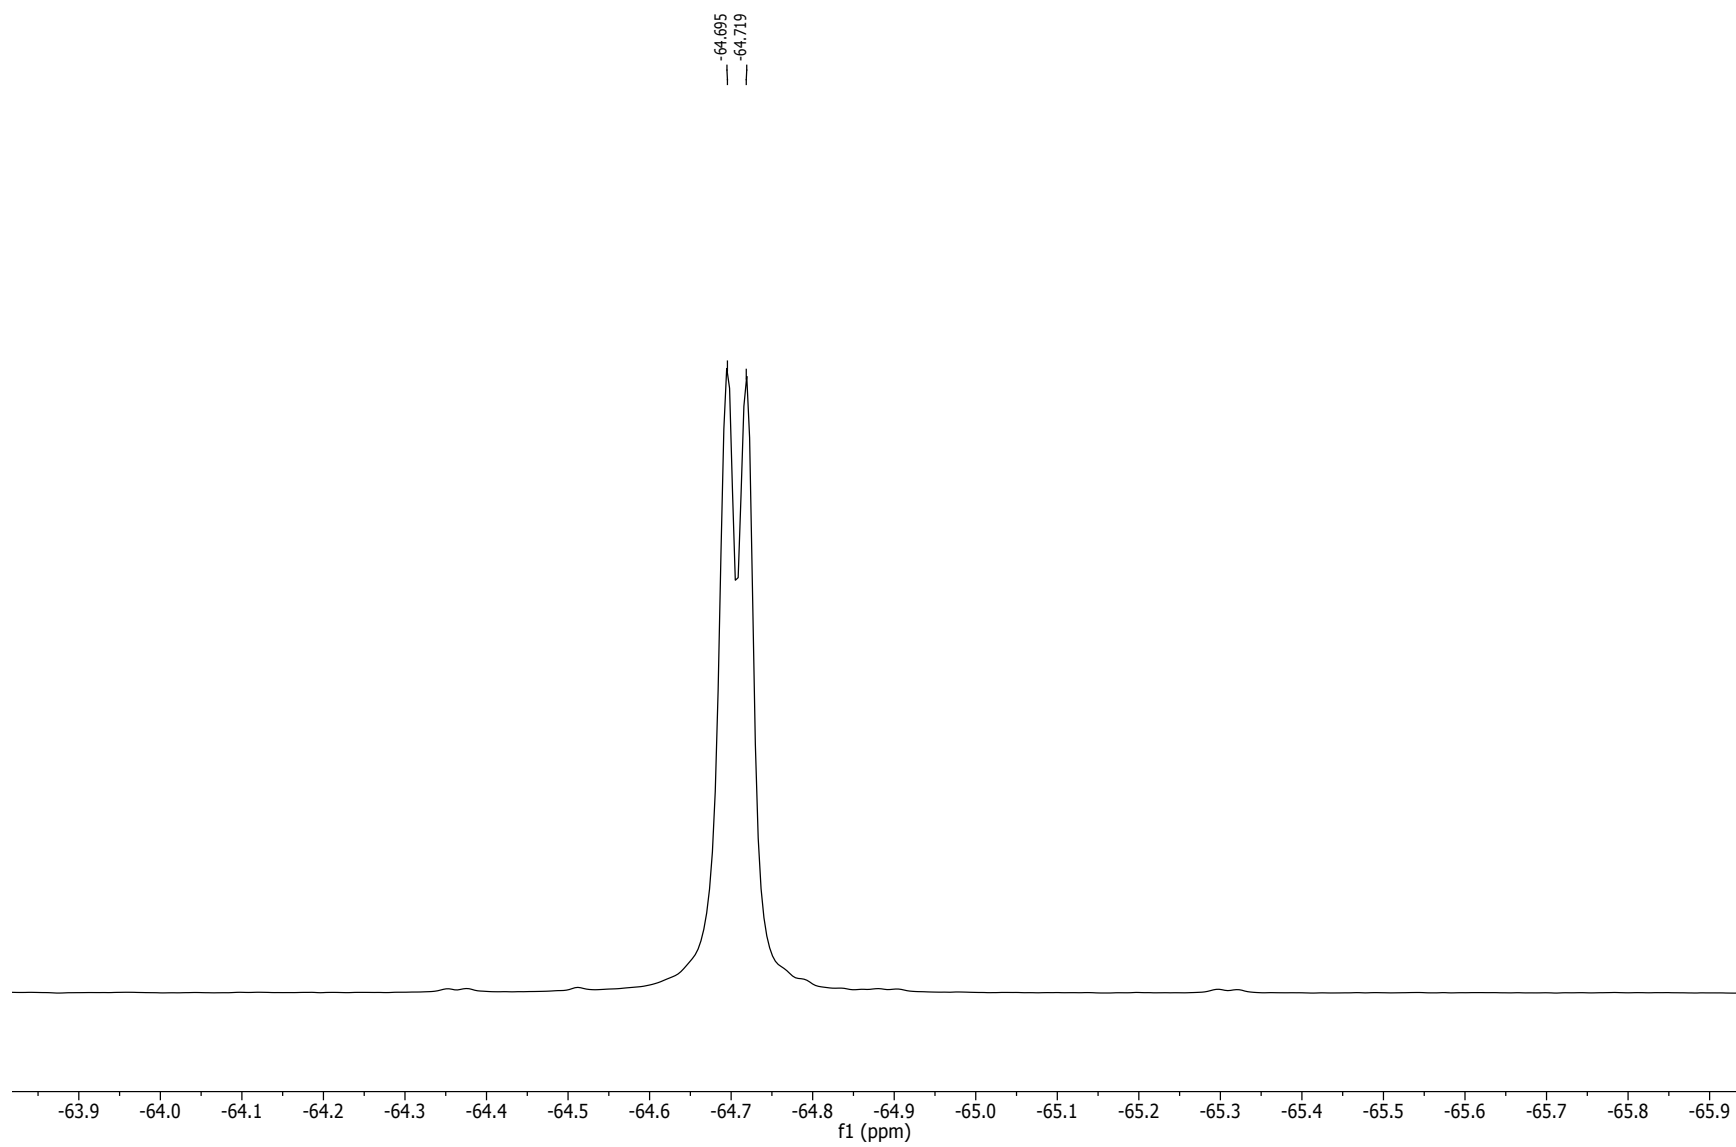

$^{19}\text{F}$  NMR Spectrum of ((1*E*,3*E*)-5,5,5-trifluoropenta-1,3-dien-1-yl)benzene (**3g**)

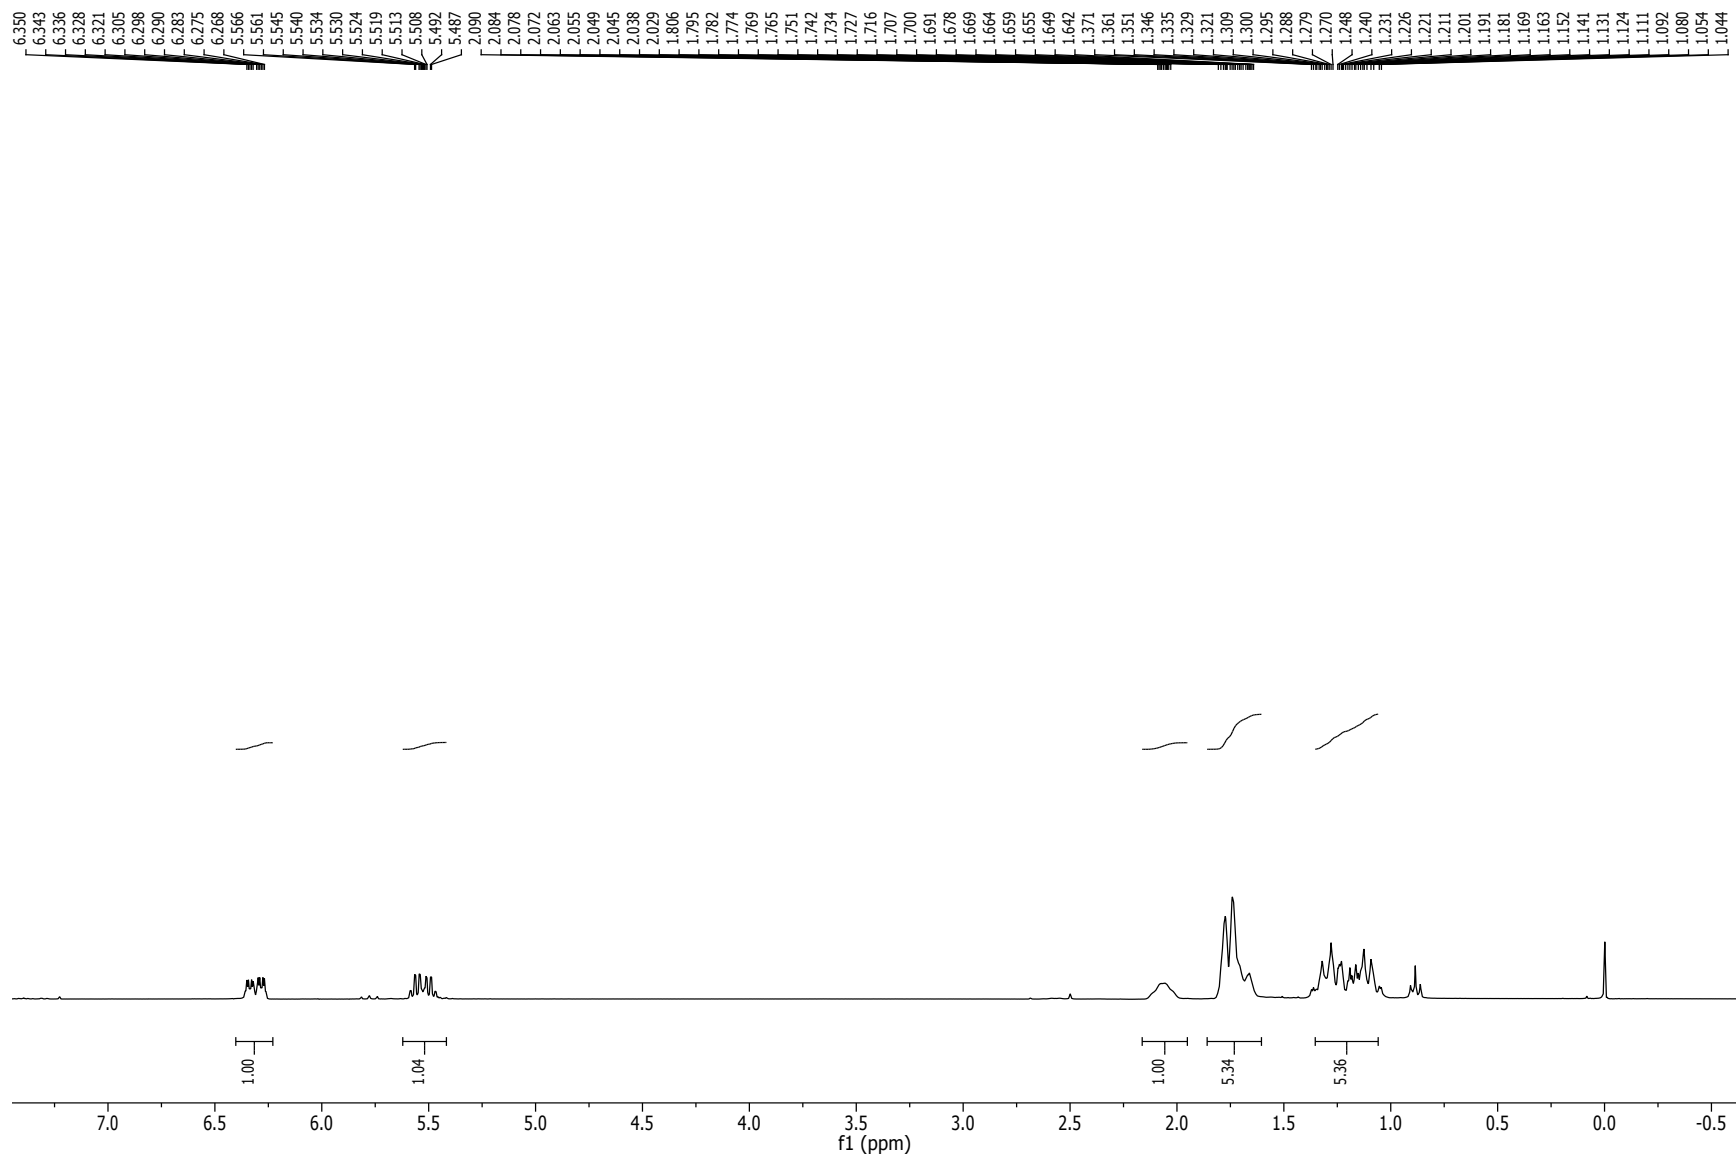

<sup>1</sup>H NMR Spectrum of (*E*)-(3,3,3-trifluoroprop-1-en-1-yl)cyclohexane (**3h**)

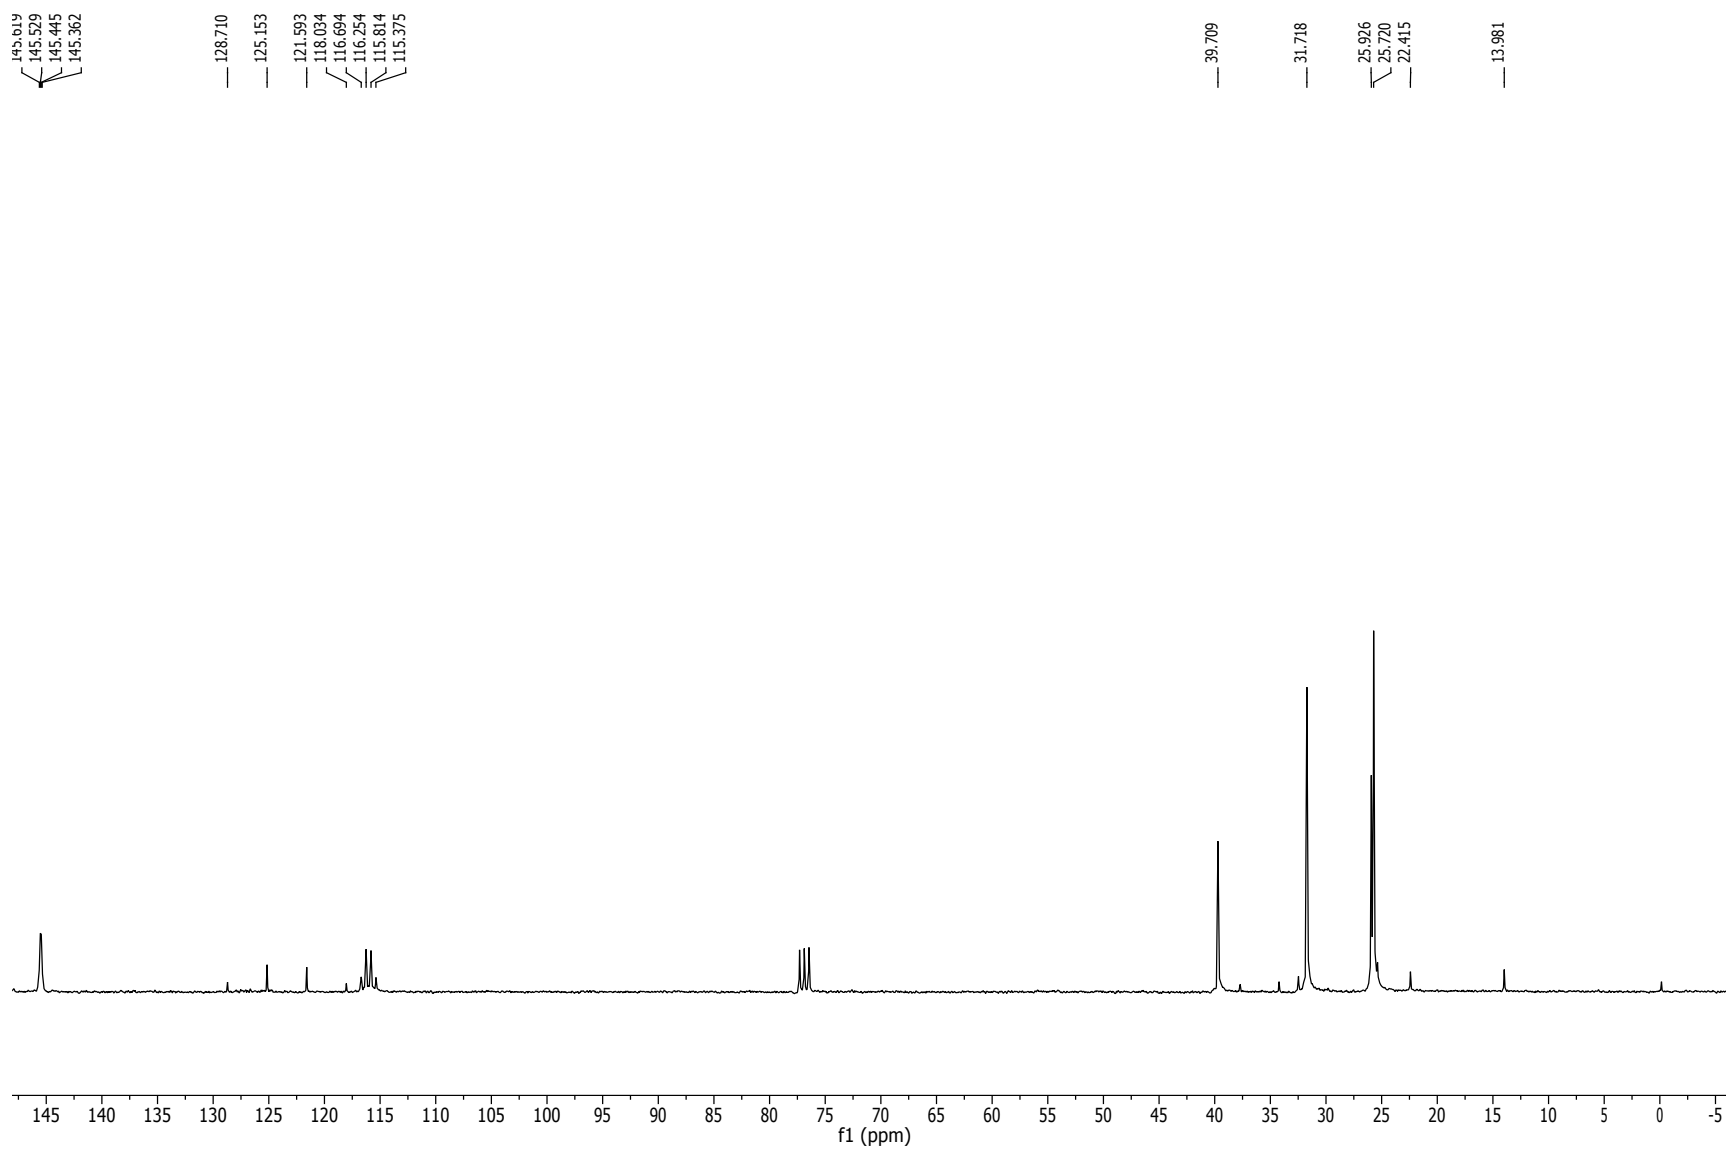

$^{13}\text{C}$  NMR Spectrum of (*E*)-(3,3,3-trifluoroprop-1-en-1-yl)cyclohexane (**3h**)

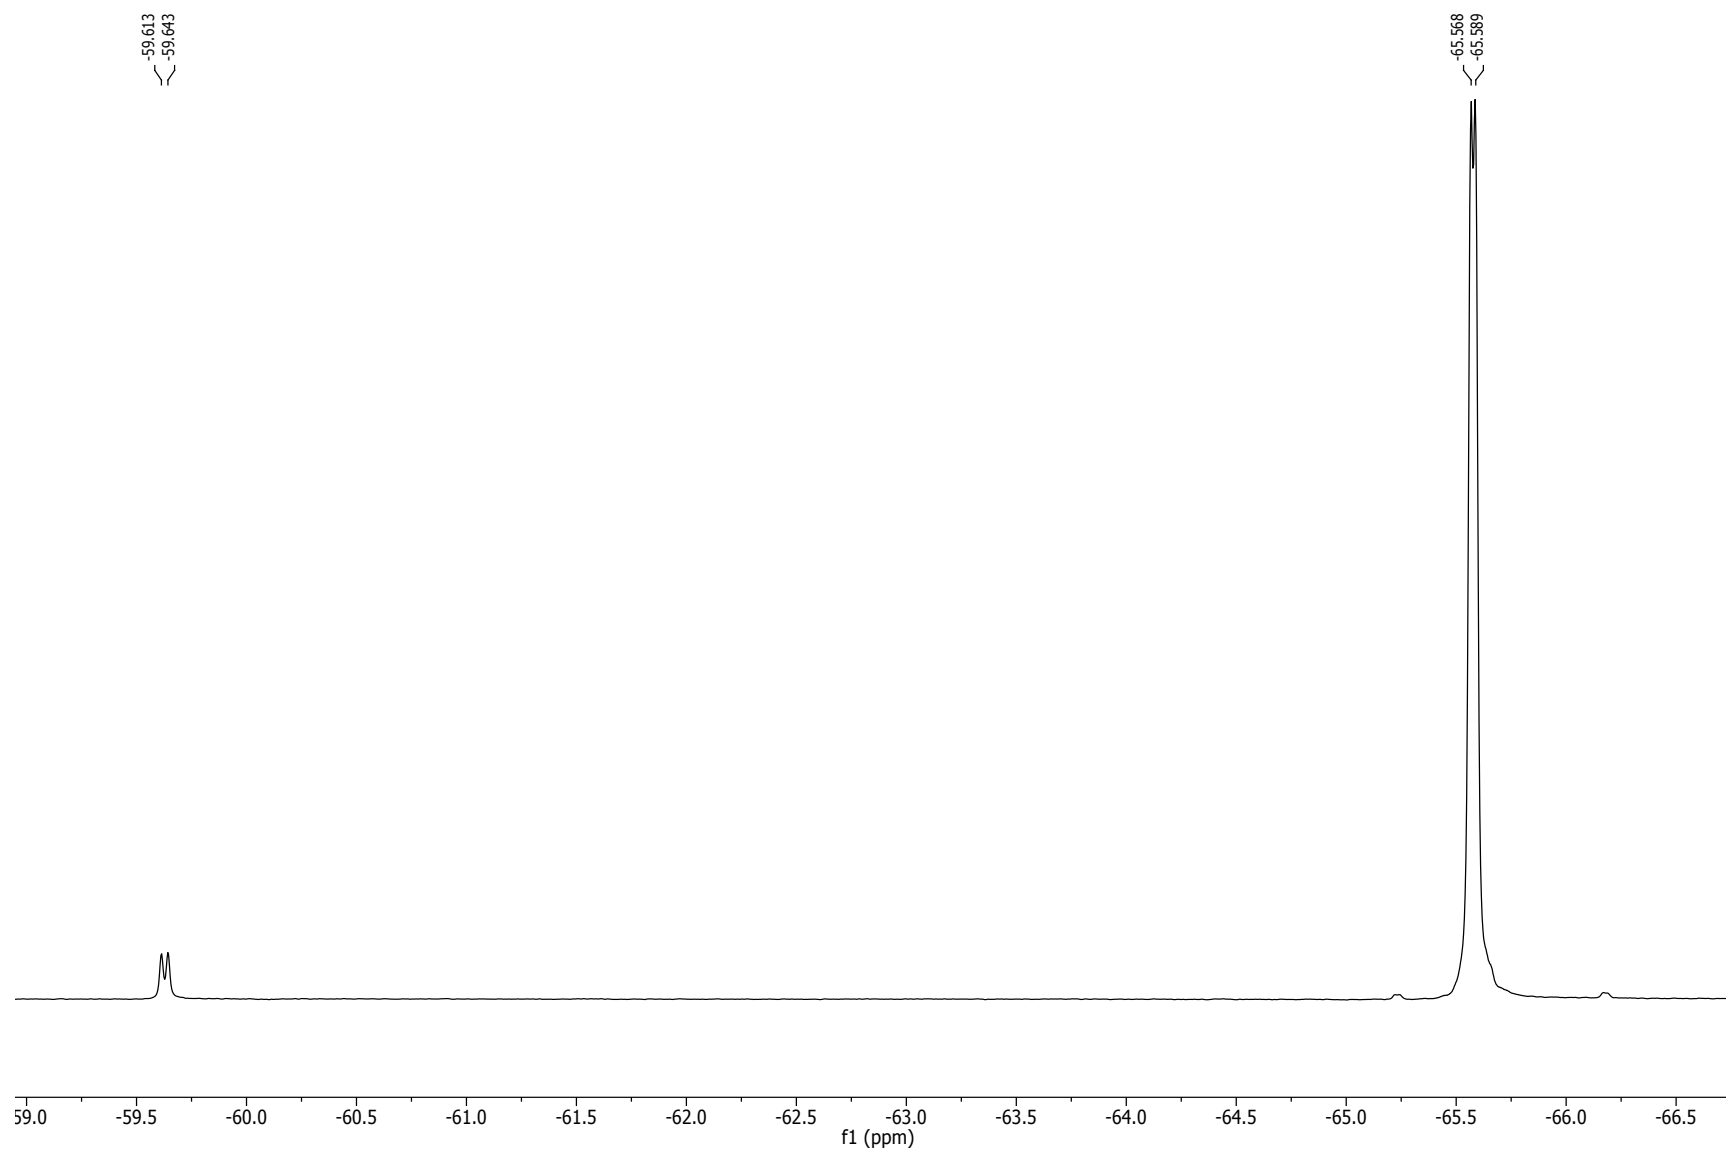

$^{19}\text{F}$  NMR Spectrum of *(E)*-(3,3,3-trifluoroprop-1-en-1-yl)cyclohexane (**3h**)

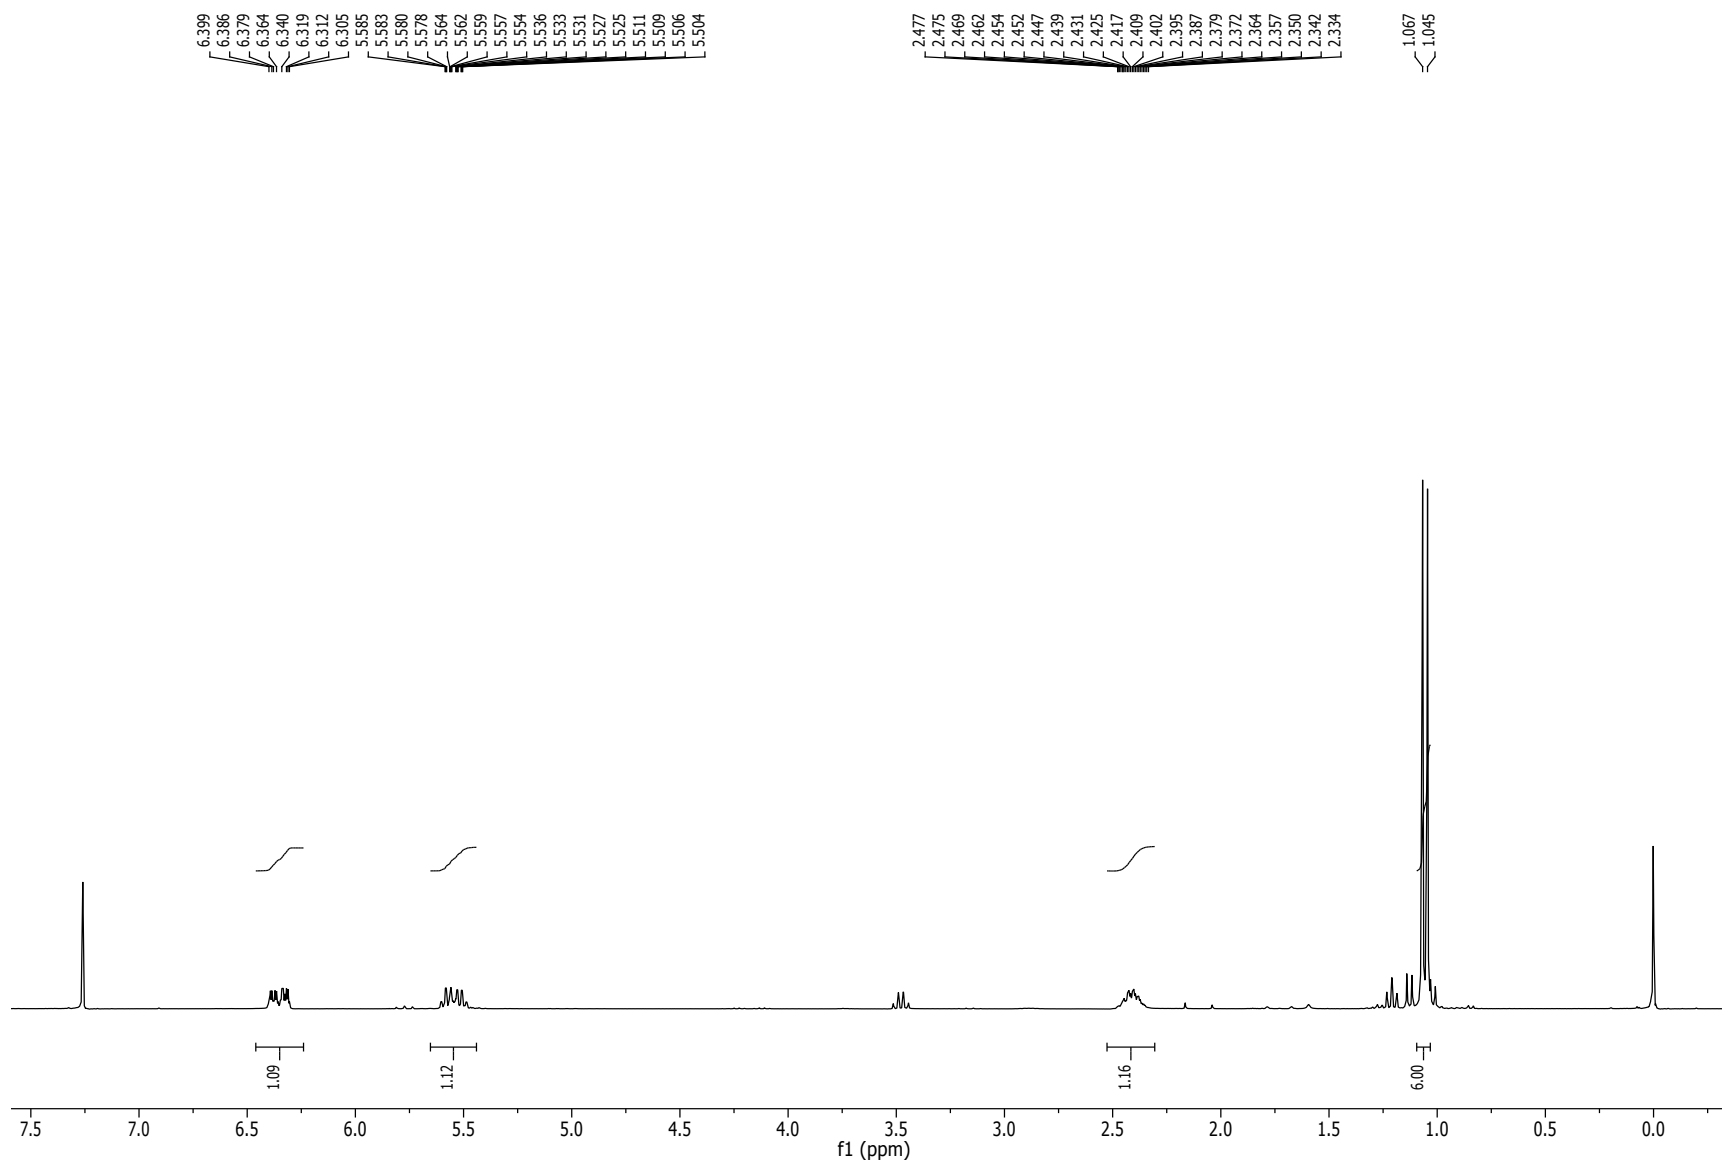

$^1\text{H}$  NMR Spectrum of (*E*)-1,1,1-trifluoro-4-methylpent-2-ene (**3i**)



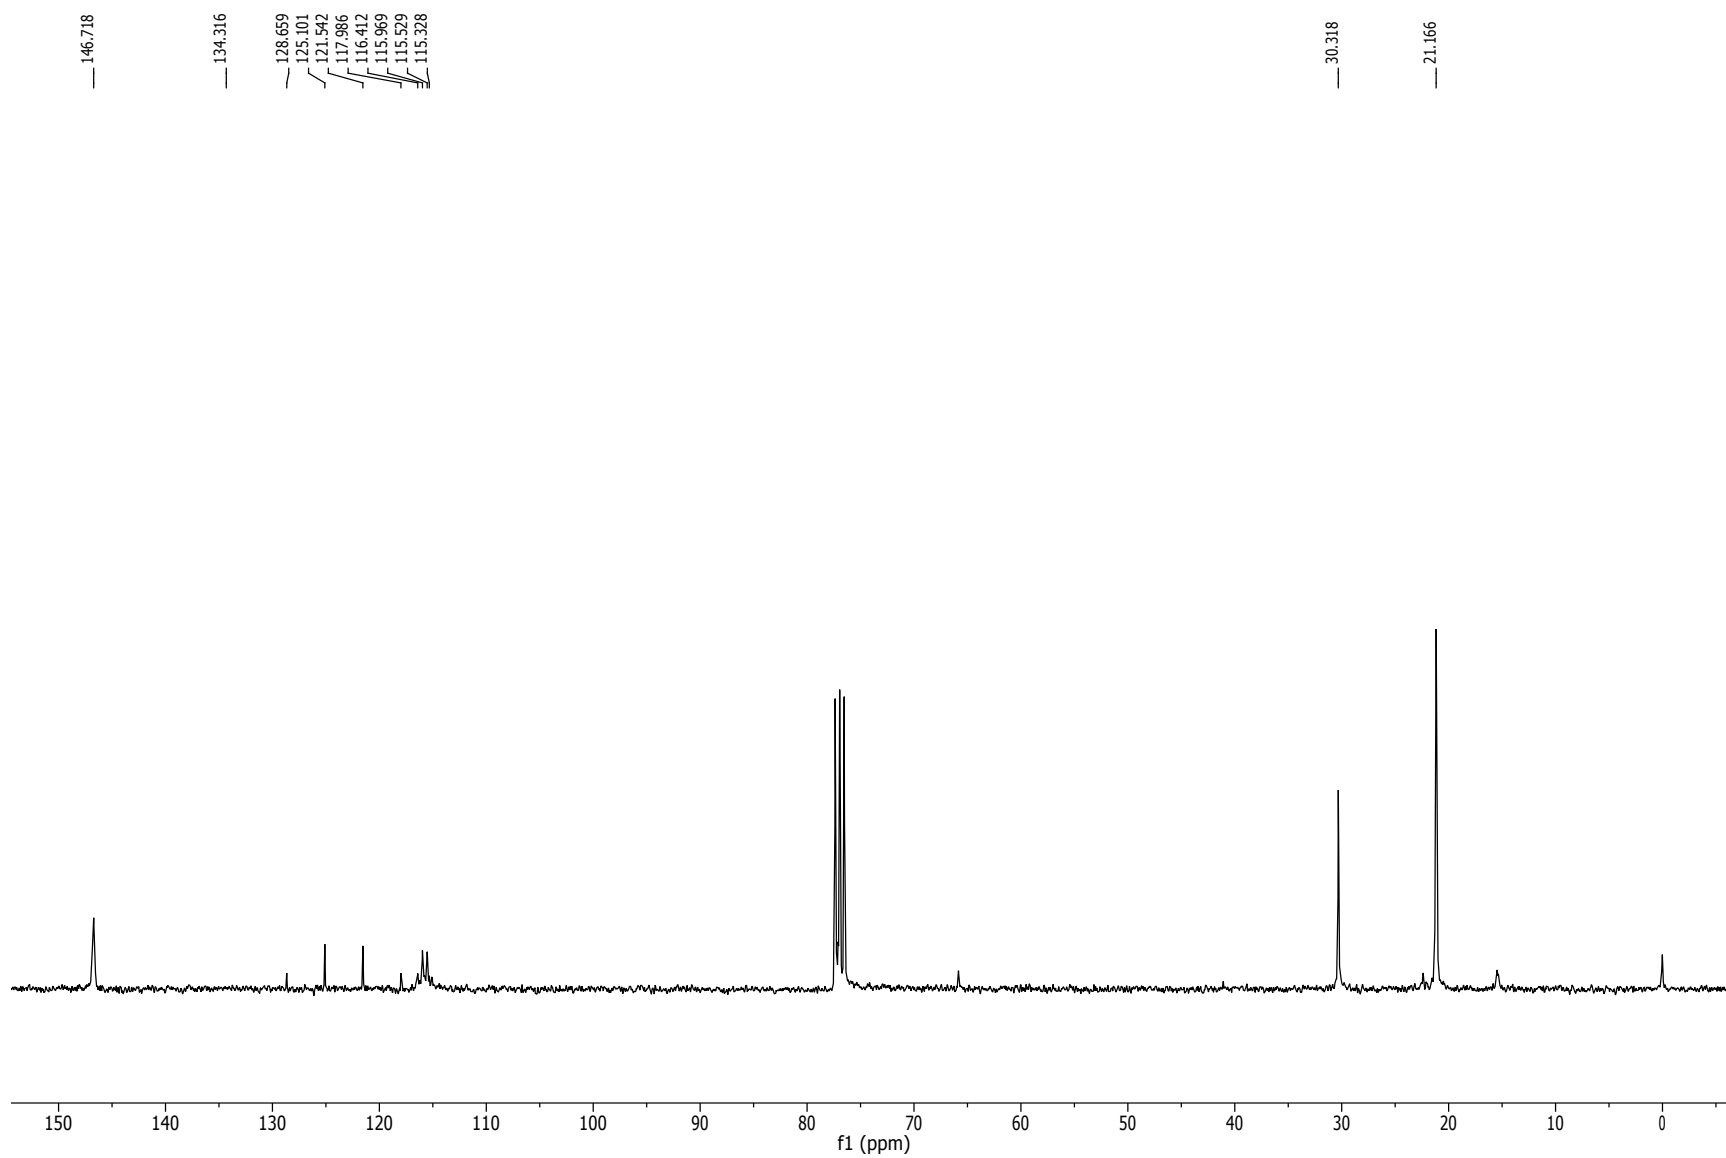

$^{13}\text{C}$  NMR Spectrum of (*E*)-1,1,1-trifluoro-4-methylpent-2-ene (**3i**)

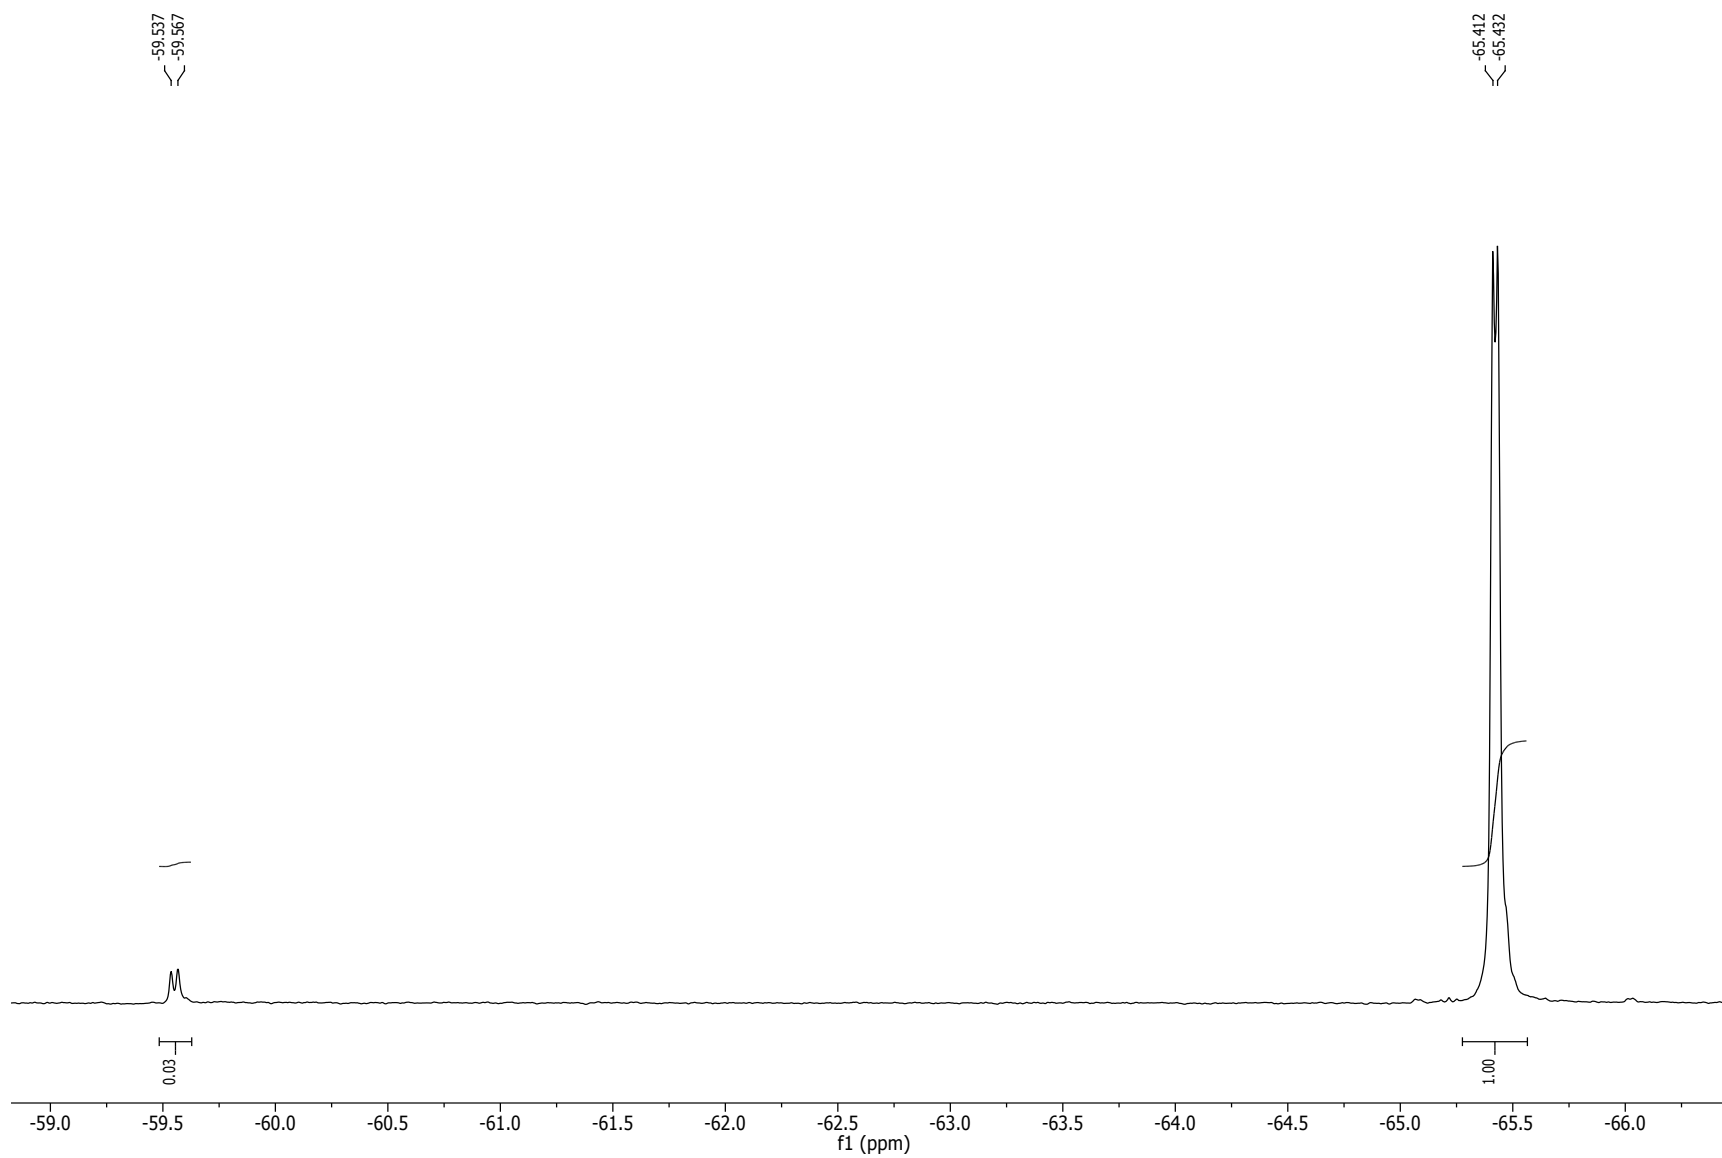

<sup>19</sup>F NMR Spectrum of (*E*)-1,1,1-trifluoro-4-methylpent-2-ene (**3i**)

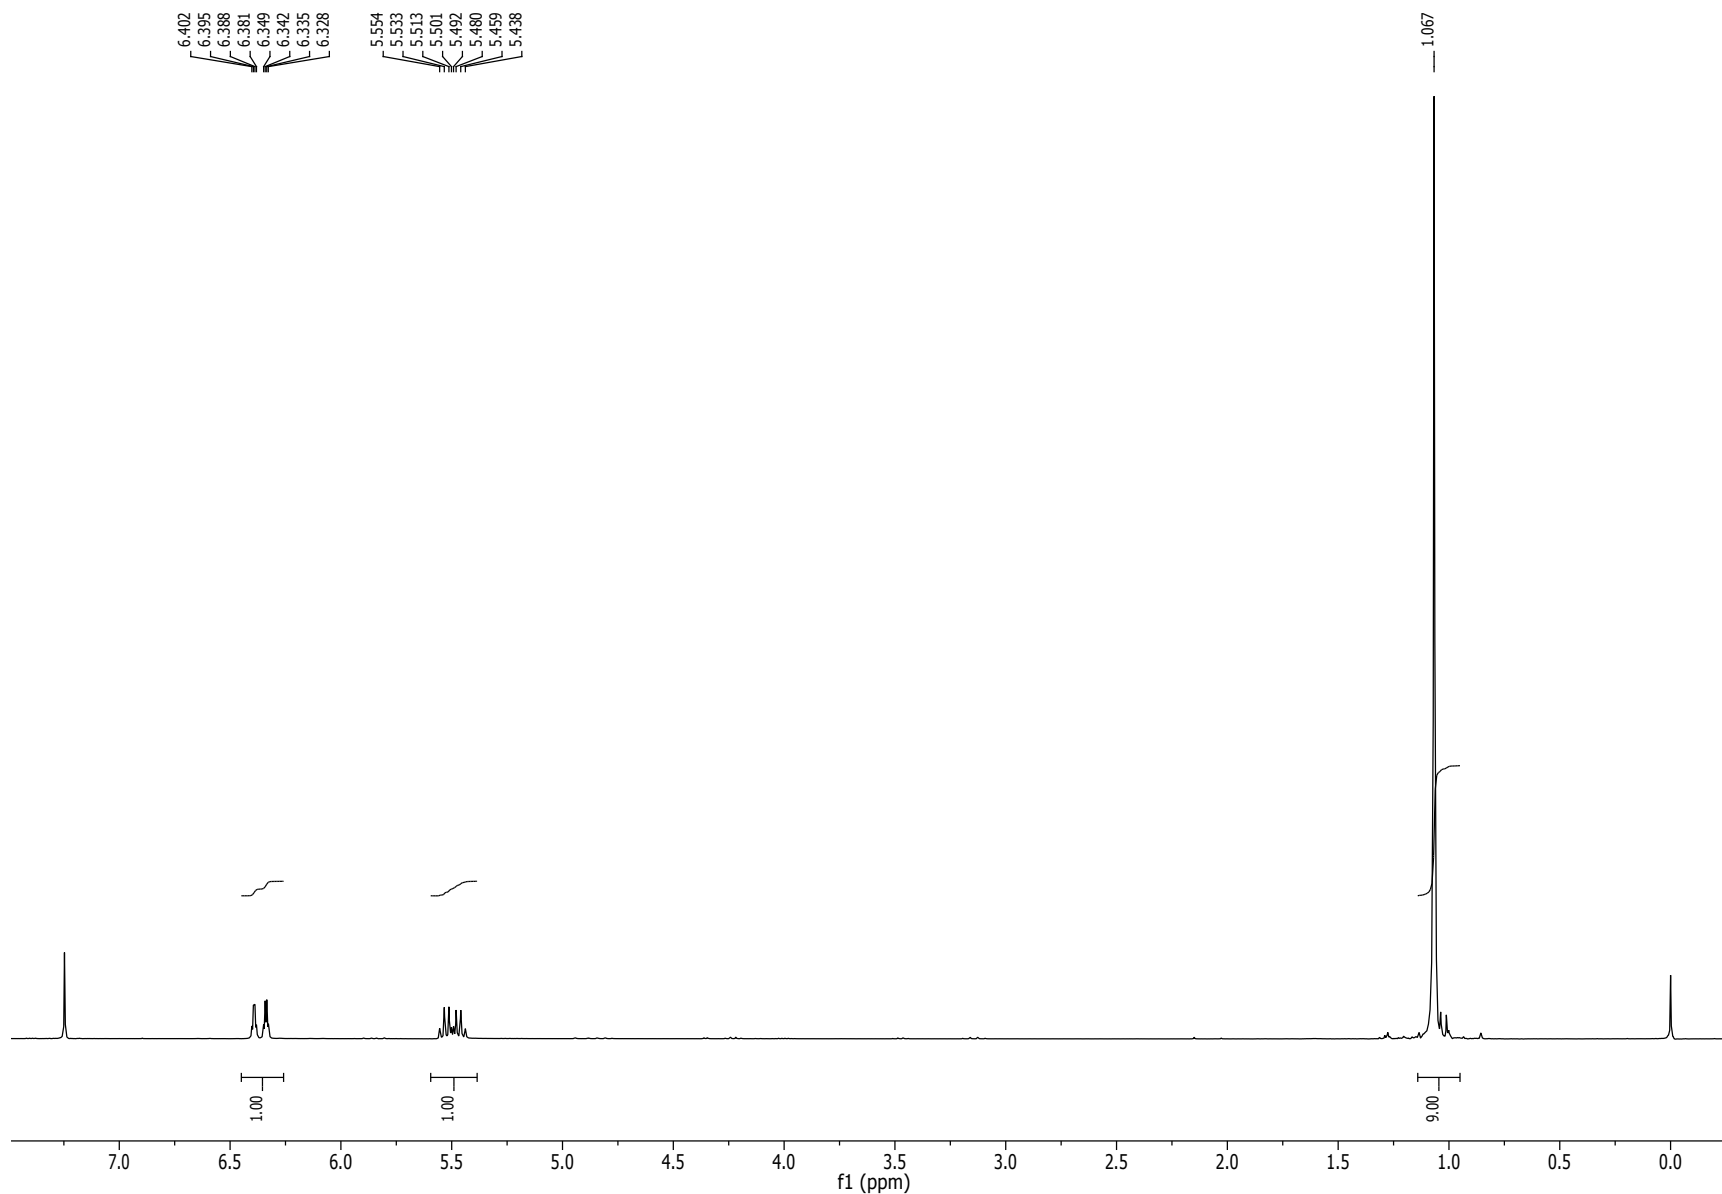

$^1\text{H}$  NMR Spectrum of (*E*)-1,1,1-trifluoro-4,4-dimethylpent-2-ene (**3j**)

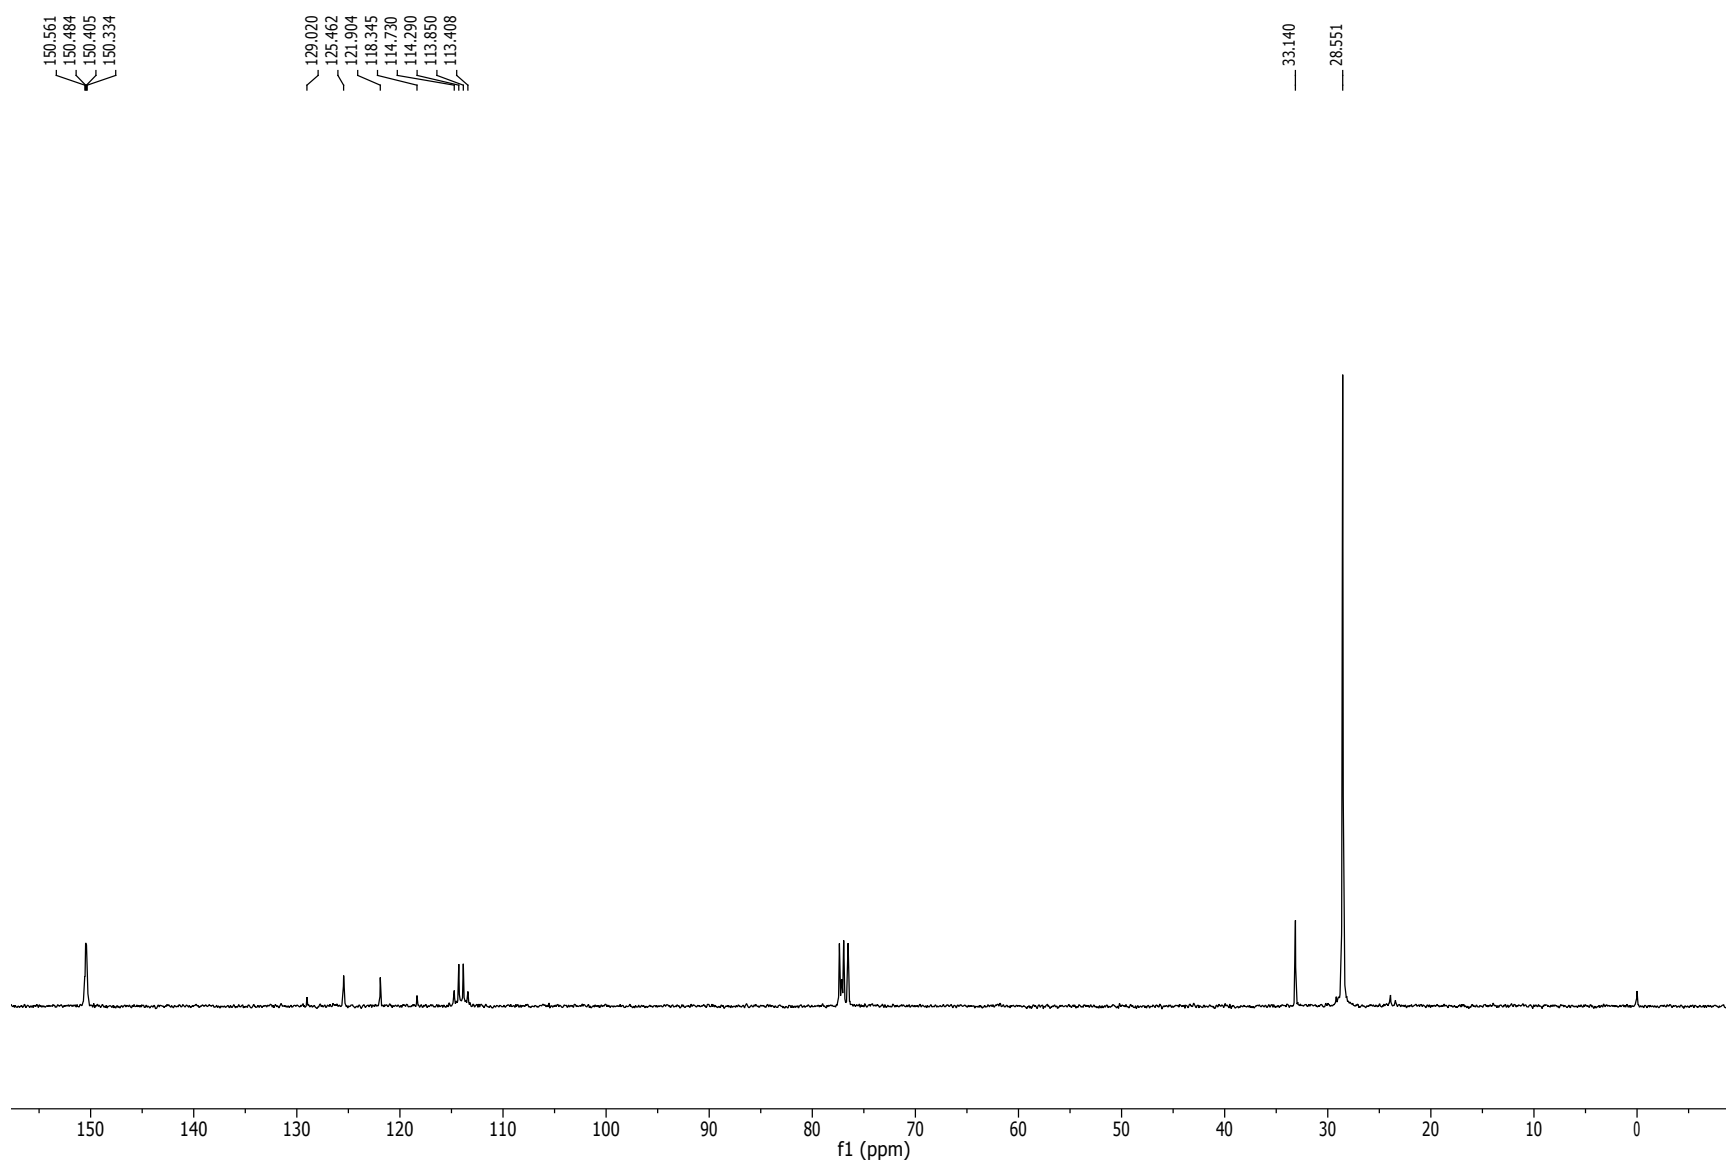

$^{13}\text{C}$  NMR Spectrum of (*E*)-1,1,1-trifluoro-4,4-dimethylpent-2-ene (**3j**)

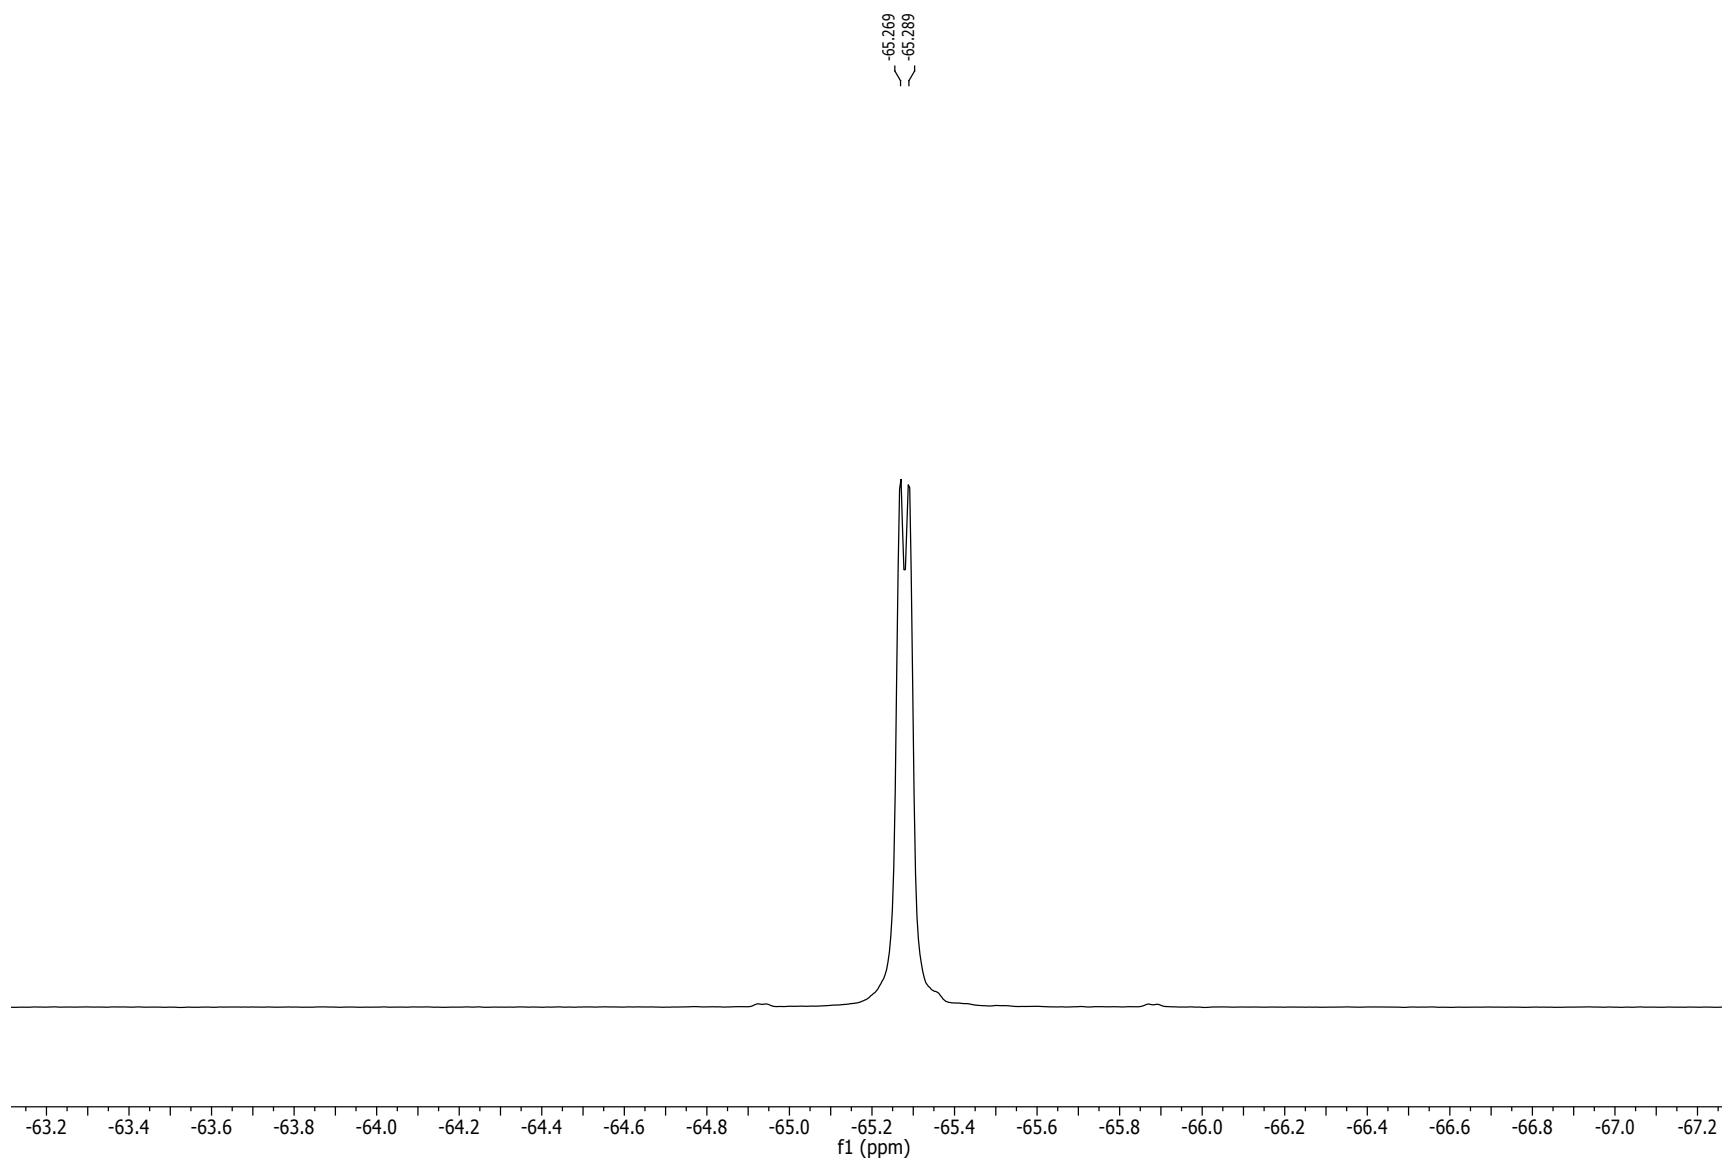

$^{19}\text{F}$  NMR Spectrum of (*E*)-1,1,1-trifluoro-4,4-dimethylpent-2-ene (**3j**)
